# Supplementary material for: New protein tyrosine phosphatase inhibitors from fungus Aspergillus gorakhpurensis F07ZB1707
Source: Royal Society of Chemistry journal article supplement (doi:10.1039/d1ra00788b), 2021-01-01
Supplement: d1ra00788b1.pdf [file d1ra00788b1.pdf]

## Supplementary Information

### New protein tyrosine phosphatase inhibitors from fungus

#### *Aspergillus gorakhpurensis* F07ZB1707†

Yannan Ji <sup>a</sup>, Qiqi Zhou <sup>a</sup>, Guosheng Liu <sup>a</sup>, Tianhui Zhu <sup>a</sup>, Yufang Wang <sup>a</sup>, Yan Fu <sup>a</sup>, Yeying Li <sup>b</sup>,  
Ruolan Li <sup>b</sup>, Xuexia Zhang <sup>b</sup>, Mei Dong <sup>c</sup>, Françoise Sauriol <sup>d</sup>, Yucheng Gu <sup>e</sup>, Qingwen Shi <sup>\*,a,c</sup>,  
Xinhua Lu <sup>\*,b</sup> and Zhiyu Ni <sup>\*,f</sup>

<sup>a</sup>School of Pharmaceutical Sciences, Hebei Medical University, Shijiazhuang 050017, China; jiyannan@yeah.net (Y.J.); chuxinzqq@163.com (Q.Z.); lgs199504@163.com (G.L.); tian\_hui\_zhu@126.com (T.Z.); wang-yufang@163.com (Y.W.); fuyan0228@hebm.u.edu.cn (Y.F.)

<sup>b</sup>New Drug Research & Development Center of North China Pharmaceutical Group Corporation, National Microbial Medicine Engineering & Research Center, Hebei Industry Microbial Metabolic Engineering & Technology Research Center, Key Laboratory for New Drug Screening Technology of Shijiazhuang City, Shijiazhuang 050015, China; li\_yeying@sohu.com (Y.L.); liruolan2013@163.com (R.L.); zhangxuexiazxx@163.com (X.Z.)

<sup>c</sup>Hebei Key Laboratory of Forensic Medicine, and Collaborative Innovation Center of Forensic Medical Molecular Identification, Hebei Medical University, Shijiazhuang 050017, China; meimeidong11@126.com

<sup>d</sup>Department of Chemistry, Queen's University, Kingston, K7L 3N6, Canada; francoise.sauriol@chem.queensu.ca

<sup>e</sup>Syngenta Jealott's Hill International Research Centre, Bracknell, Berkshire, RG42 6EY, UK; yucheng.gu@syngenta.com

<sup>f</sup>School of Basic Medical Science, Hebei University, Baoding 071002, China; nizhiyu@hbu.edu.cn

\*Correspondence: shiqingwen405@163.com (Q.S.); luxinhua89@yeah.net (X.L.); nizhiyu@hbu.edu.cn (Z.N.);

Tel.: +86-311-8626-1270 (Q.S.); +86-311-8815-2439 (X.L.); +86-312-507-9625 (Z.N.)

#### Table of Contents

**S1** <sup>1</sup>H NMR (700 MHz, CDCl<sub>3</sub>) spectrum of aspergorakhins A (**1**).

**S2** <sup>13</sup>C NMR (175 MHz, CDCl<sub>3</sub>) spectrum of aspergorakhins A (**1**).

**S3** HSQC spectrum of aspergorakhins A (**1**).

**S4** COSY spectrum of aspergorakhins A (**1**).

**S5** HMBC spectrum of aspergorakhins A (**1**).

**S6** NOESY spectrum of aspergorakhins A (**1**).

**S7** (+)-HRESIMS spectrum of aspergorakhins A (**1**).

**S8** UV spectrum of aspergorakhins A (**1**).

S9 IR spectrum of aspergorakhins A (1).  
S10 <sup>1</sup>H NMR (700 MHz, CDCl<sub>3</sub>) spectrum of aspergorakhins B (2).  
S11 <sup>13</sup>C NMR (175 MHz, CDCl<sub>3</sub>) spectrum of aspergorakhins B (2).  
S12 DEPT135 spectrum of aspergorakhins B (2).  
S13 HSQC spectrum of aspergorakhins B (2).  
S14 COSY spectrum of aspergorakhins B (2).  
S15 HMBC spectrum of aspergorakhins B (2).  
S16 NOESY spectrum of aspergorakhins B (2).  
S17 (+)-HRESIMS spectrum of aspergorakhins B (2).  
S18 UV spectrum of aspergorakhins B (2).  
S19 IR spectrum of aspergorakhins B (2).  
S20 <sup>1</sup>H NMR (700 MHz, CD<sub>3</sub>OD) spectrum of aspergorakhins C (3).  
S21 <sup>13</sup>C NMR (175 MHz, CD<sub>3</sub>OD) spectrum of aspergorakhins C (3).  
S22 DEPT135 spectrum of aspergorakhins C (3).  
S23 HSQC spectrum of aspergorakhins C (3).  
S24 COSY spectrum of aspergorakhins C (3).  
S25 HMBC spectrum of aspergorakhins C (3).  
S26 NOESY spectrum of aspergorakhins C (3).  
S27 (+)-HRESIMS spectrum of aspergorakhins C (3).  
S28 UV spectrum of aspergorakhins C (3).  
S29 IR spectrum of aspergorakhins C (3).  
S30 <sup>1</sup>H NMR (700 MHz, CD<sub>3</sub>OD) spectrum of aspergorakhins D (4).  
S31 <sup>13</sup>C NMR (175 MHz, CD<sub>3</sub>OD) spectrum of aspergorakhins D (4).  
S32 DEPT135 spectrum of aspergorakhins D (4).  
S33 HSQC spectrum of aspergorakhins D (4).  
S34 COSY spectrum of aspergorakhins D (4).  
S35 HMBC spectrum of aspergorakhins D (4).  
S36 NOESY spectrum of aspergorakhins D (4).  
S37 (+)-HRESIMS spectrum of aspergorakhins D (4).  
S38 UV spectrum of aspergorakhins D (4).  
S39 IR spectrum of aspergorakhins D (4).  
S40 <sup>1</sup>H NMR (600 MHz, CD<sub>3</sub>OD) spectrum of aspergorakhins E (5).  
S41 <sup>13</sup>C NMR (150 MHz, CD<sub>3</sub>OD) spectrum of aspergorakhins E (5).  
S42 HSQC spectrum of aspergorakhins E (5).  
S43 COSY spectrum of aspergorakhins E (5).  
S44 HMBC spectrum of aspergorakhins E (5).  
S45 ESIMS spectrum of aspergorakhins E (5).  
S46 (+)-HRESIMS spectrum of aspergorakhins E (5).  
S47 UV spectrum of aspergorakhins E (5).  
S48 IR spectrum of aspergorakhins E (5).  
S49 <sup>1</sup>H NMR (600 MHz, CD<sub>3</sub>OD) spectrum of aspergorakhins F (6).  
S50 <sup>13</sup>C NMR (150 MHz, CD<sub>3</sub>OD) spectrum of aspergorakhins F (6).  
S51 HSQC spectrum of aspergorakhins F (6).  
S52 COSY spectrum of aspergorakhins F (6).

S53 HMBC spectrum of aspergorakhins F (6).  
S54 ESIMS spectrum of aspergorakhins F (6).  
S55 (+)-HRESIMS spectrum of aspergorakhins F (6).  
S56 UV spectrum of aspergorakhins F (6).  
S57 IR spectrum of aspergorakhins F (6).  
S58 <sup>1</sup>H NMR (600 MHz, CD<sub>3</sub>OD) spectrum of aspergorakhins G (7).  
S59 <sup>13</sup>C NMR (150 MHz, CD<sub>3</sub>OD) spectrum of aspergorakhins G (7).  
S60 HSQC spectrum of aspergorakhins G (7).  
S61 COSY spectrum of aspergorakhins G (7).  
S62 HMBC spectrum of aspergorakhins G (7).  
S63 ESIMS spectrum of aspergorakhins G (7).  
S64 (+)-HRESIMS spectrum of aspergorakhins G (7).  
S65 UV spectrum of aspergorakhins G (7).  
S66 IR spectrum of aspergorakhins G (7).  
S67 <sup>1</sup>H NMR (600 MHz, CD<sub>3</sub>OD) spectrum of aspergorakhins H (8).  
S68 <sup>13</sup>C NMR (150 MHz, CD<sub>3</sub>OD) spectrum of aspergorakhins H (8).  
S69 HSQC spectrum of aspergorakhins H (8).  
S70 COSY spectrum of aspergorakhins H (8).  
S71 HMBC spectrum of aspergorakhins H (8).  
S72 NOESY spectrum of aspergorakhins H (8).  
S73 ESIMS spectrum of aspergorakhins H (8).  
S74 (+)-HRESIMS spectrum of aspergorakhins H (8).  
S75 UV spectrum of aspergorakhins H (8).  
S76 IR spectrum of aspergorakhins H (8).  
S77 <sup>1</sup>H NMR (600 MHz, CD<sub>3</sub>OD) spectrum of aspergorakhins I (9).  
S78 <sup>13</sup>C NMR (150 MHz, CD<sub>3</sub>OD) spectrum of aspergorakhins I (9).  
S79 HSQC spectrum of aspergorakhins I (9).  
S80 COSY spectrum of aspergorakhins I (9).  
S81 HMBC spectrum of aspergorakhins I (9).  
S82 NOESY spectrum of aspergorakhins I (9).  
S83 ESIMS spectrum of aspergorakhins I (9).  
S84 (+)-HRESIMS spectrum of aspergorakhins I (9).  
S85 UV spectrum of aspergorakhins I (9).  
S86 IR spectrum of aspergorakhins I (9).  
S87 <sup>1</sup>H NMR (600 MHz, CD<sub>3</sub>OD) spectrum of aspergorakhins J (10).  
S88 <sup>13</sup>C NMR (150 MHz, CD<sub>3</sub>OD) spectrum of aspergorakhins J (10).  
S89 HSQC spectrum of aspergorakhins J (10).  
S90 COSY spectrum of aspergorakhins J (10).  
S91 HMBC spectrum of aspergorakhins J (10).  
S92 ESIMS spectrum of aspergorakhins J (10).  
S93 (+)-HRESIMS spectrum of aspergorakhins J (10).  
S94 UV spectrum of aspergorakhins J (10).  
S95 IR spectrum of aspergorakhins J (10).  
S96 <sup>1</sup>H NMR (700 MHz, CDCl<sub>3</sub>) spectrum of aspergorakhins K (11).

- S97**  $^{13}\text{C}$  NMR (175 MHz,  $\text{CDCl}_3$ ) spectrum of aspergorakhins K (**11**).
- S98** HSQC spectrum of aspergorakhins K (**11**).
- S99** COSY spectrum of aspergorakhins K (**11**).
- S100** HMBC spectrum of aspergorakhins K (**11**).
- S101** (+)-HRESIMS spectrum of aspergorakhins K (**11**).
- S102** UV spectrum of aspergorakhins K (**11**).
- S103** IR spectrum of aspergorakhins K (**11**).
- S104**  $^1\text{H}$  NMR (600 MHz, Acetone- $d_6$ ) spectrum of aspergorakhins L (**12**).
- S105**  $^{13}\text{C}$  NMR (150 MHz, Acetone- $d_6$ ) spectrum of aspergorakhins L (**12**).
- S106** HSQC spectrum of aspergorakhins L (**12**).
- S107** COSY spectrum of aspergorakhins L (**12**).
- S108** HMBC spectrum of aspergorakhins L (**12**).
- S109** NOESY spectrum of aspergorakhins L (**12**).
- S110** (+)-HRESIMS spectrum of aspergorakhins L (**12**).
- S111** UV spectrum of aspergorakhins L (**12**).
- S112** IR spectrum of aspergorakhins L (**12**).
- S113** Experimental ECD spectra of **5**, **8-11**.
- S114** Quantum chemical ECD and OR calculation of models **5**, **8-11**.
- S115** Possible isomers, experimental and calculated ECD of **5**, **8-11**.
- S116** Detailed procedure of inhibitory activity of enzymes assay.
- S117** ITS gene sequences of *Aspergillus gorakhpurensis* F07ZB1707.

S1  $^1\text{H}$  NMR (700 MHz,  $\text{CDCl}_3$ ) spectrum of aspergorakhins A (**1**).

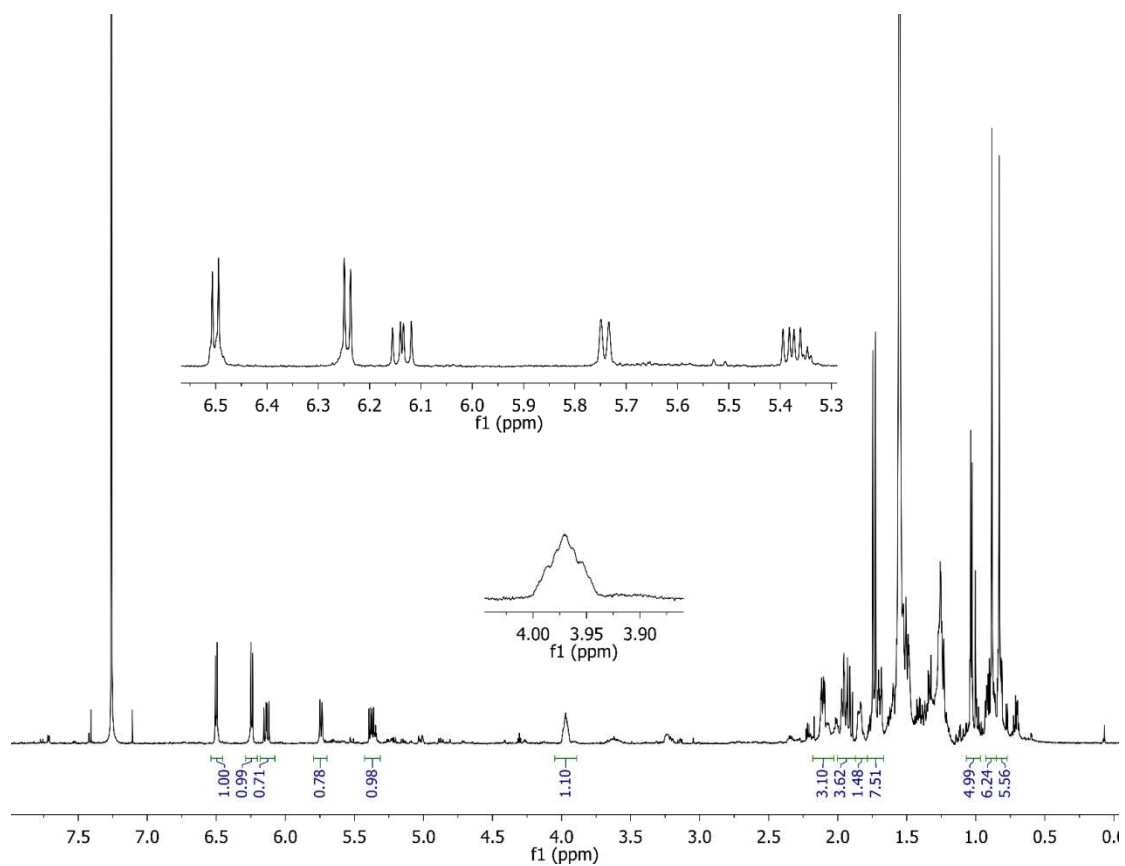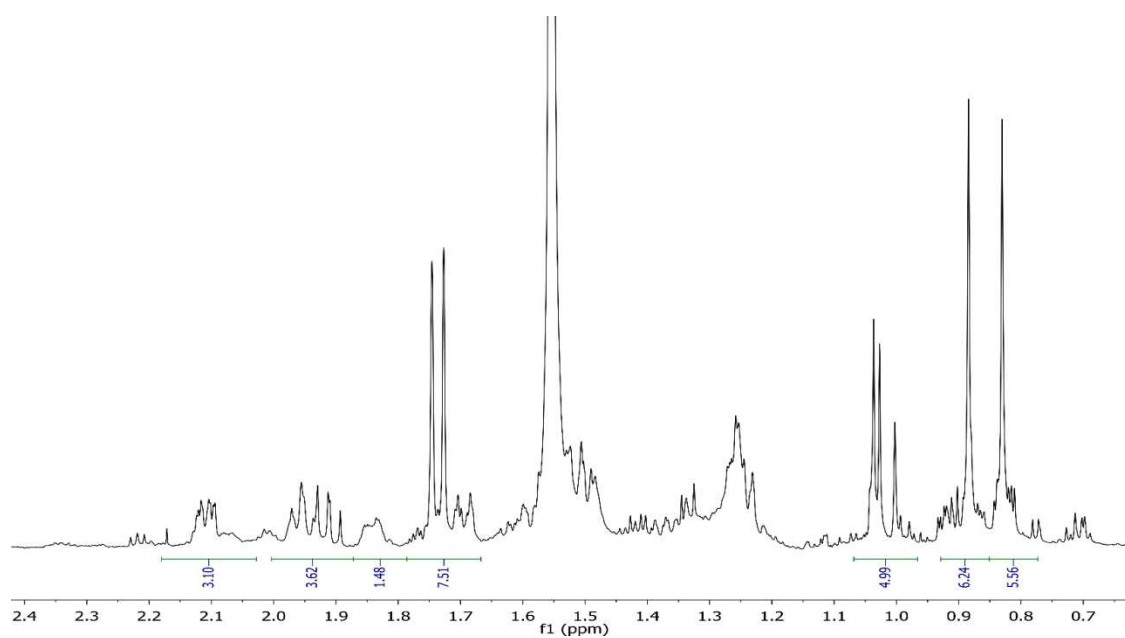

S2 <sup>13</sup>C NMR (175 MHz, CDCl<sub>3</sub>) spectrum of aspergorakhins A (1).

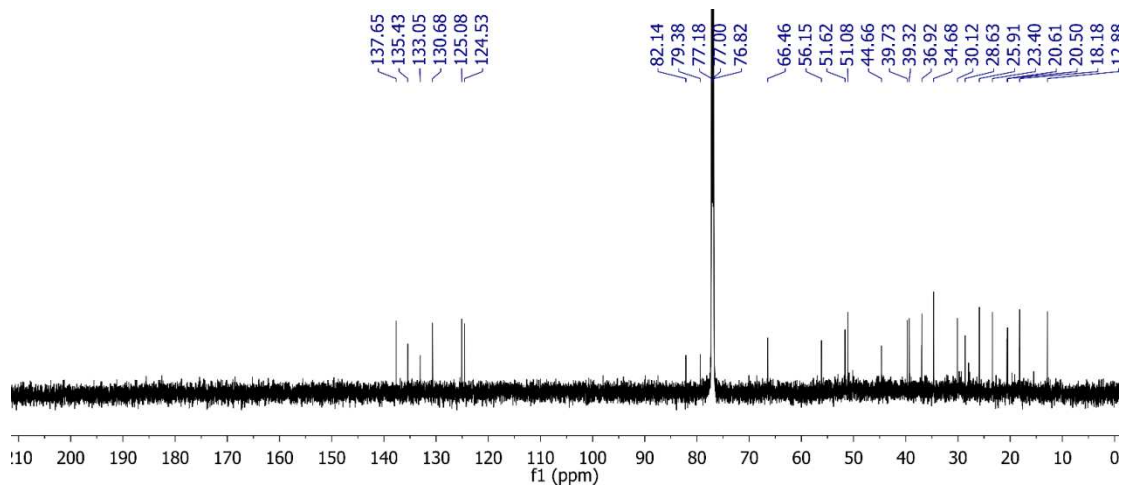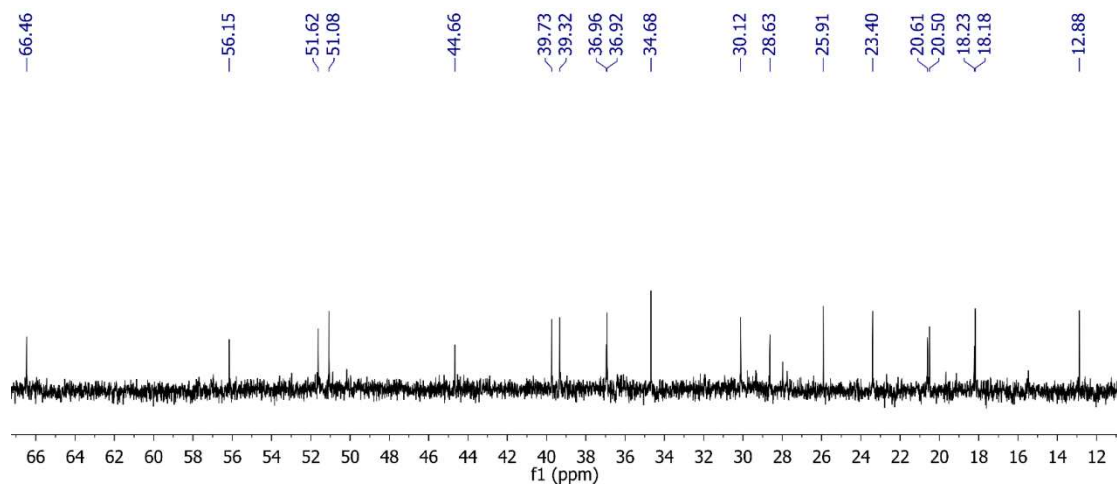

S3 HSQC spectrum of aspergorakhins A (1).

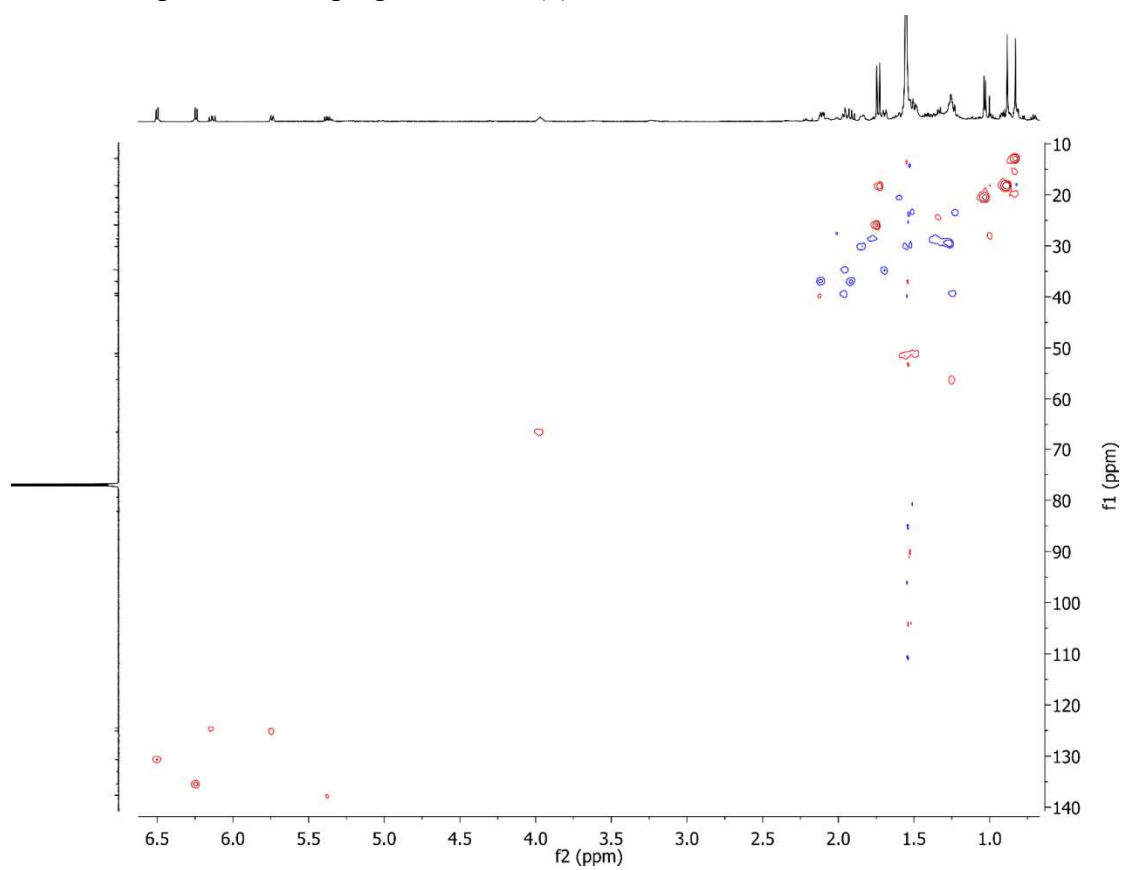

S4 COSY spectrum of aspergorakhins A (1).

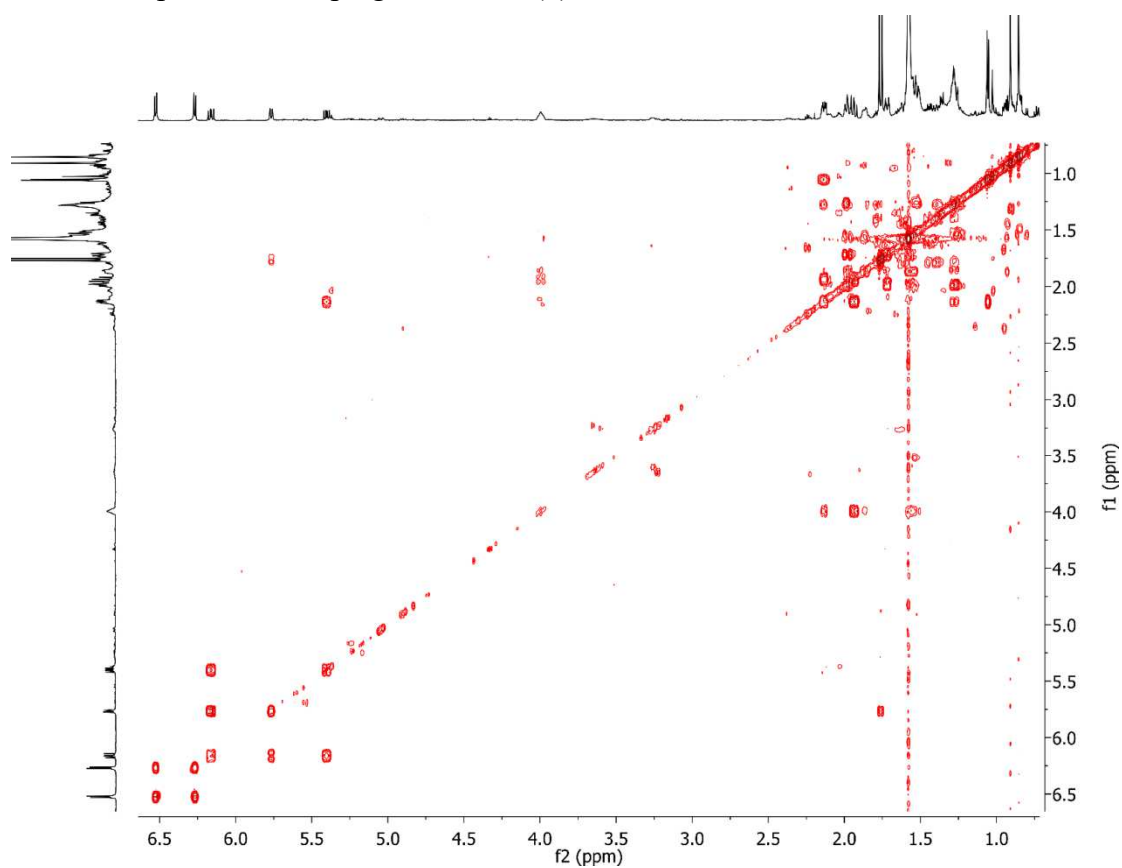

S5 HMBC spectrum of aspergorakhins A (1).

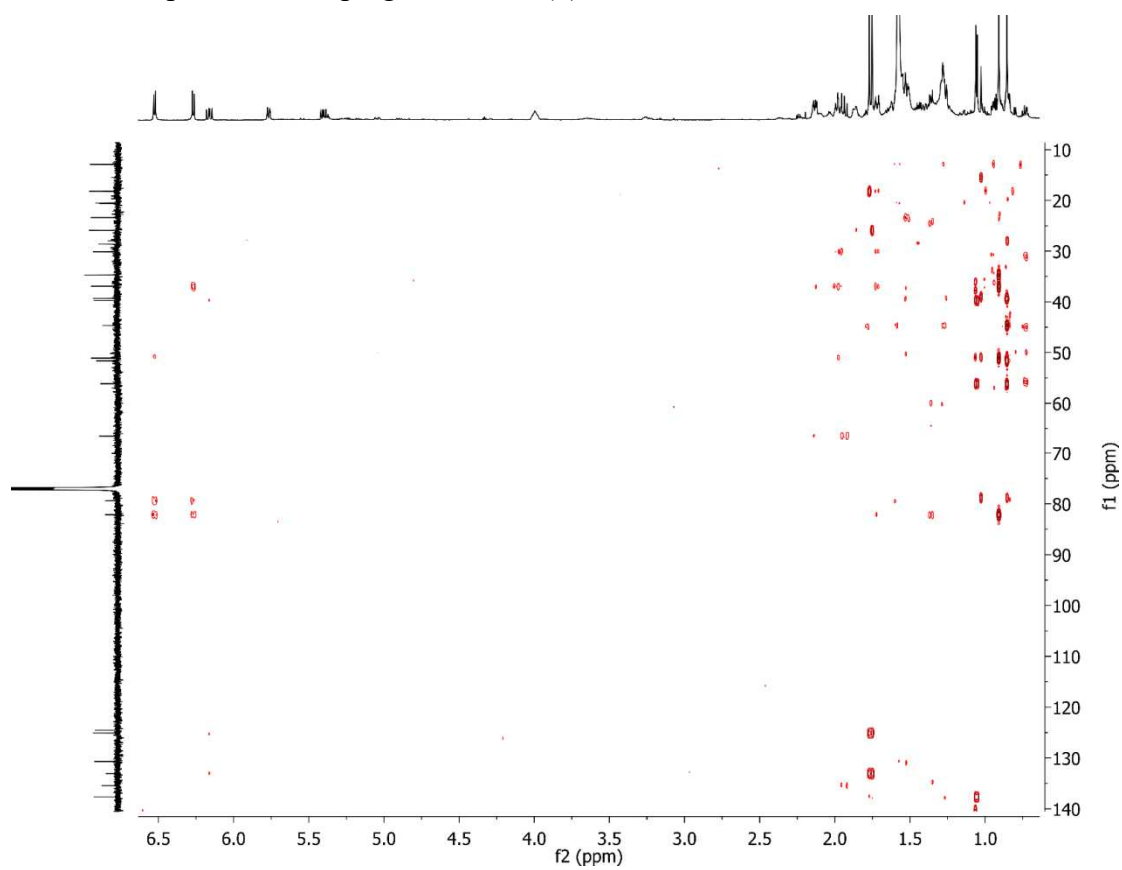

S6 NOESY spectrum of aspergorakhins A (1).

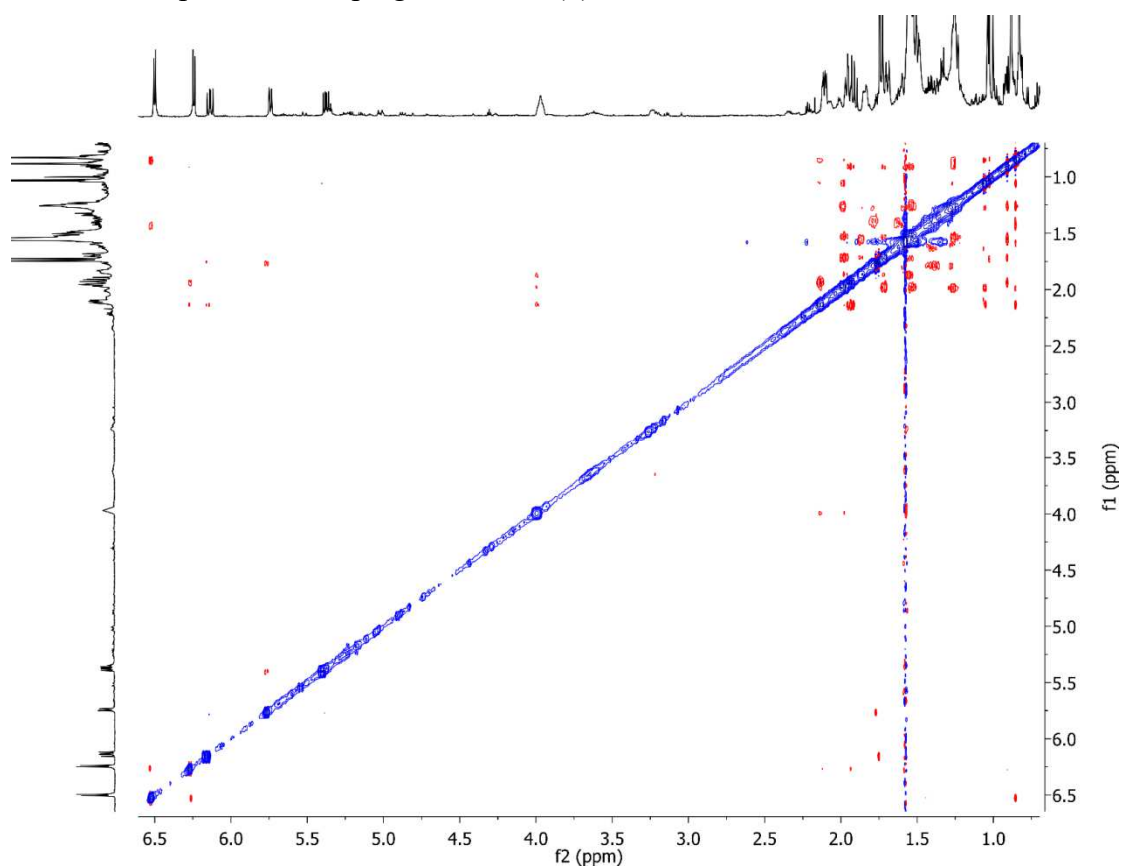



### S7 (+)-HRESIMS spectrum of aspergorakhins A (1).

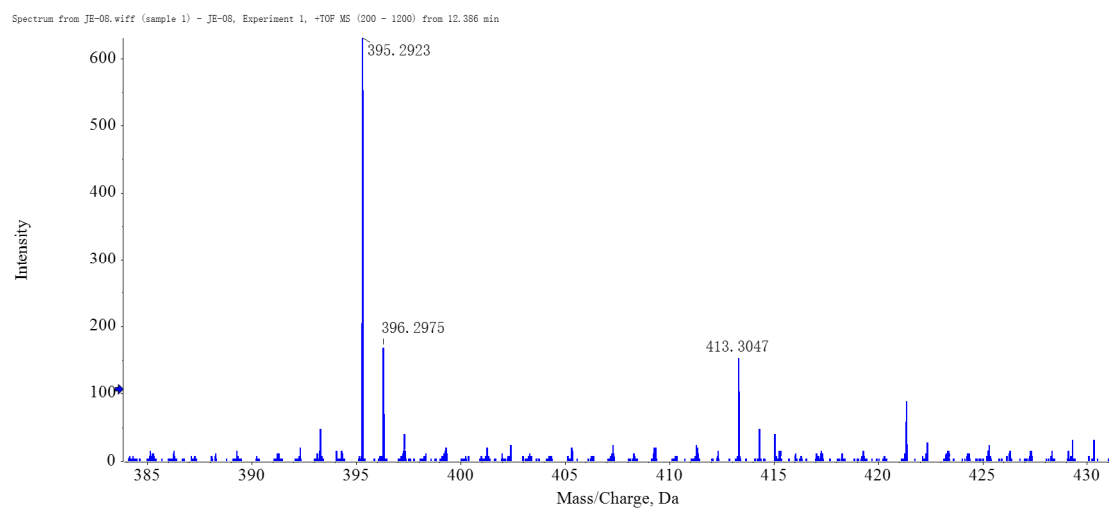

### S8 UV spectrum of aspergorakhins A (1).

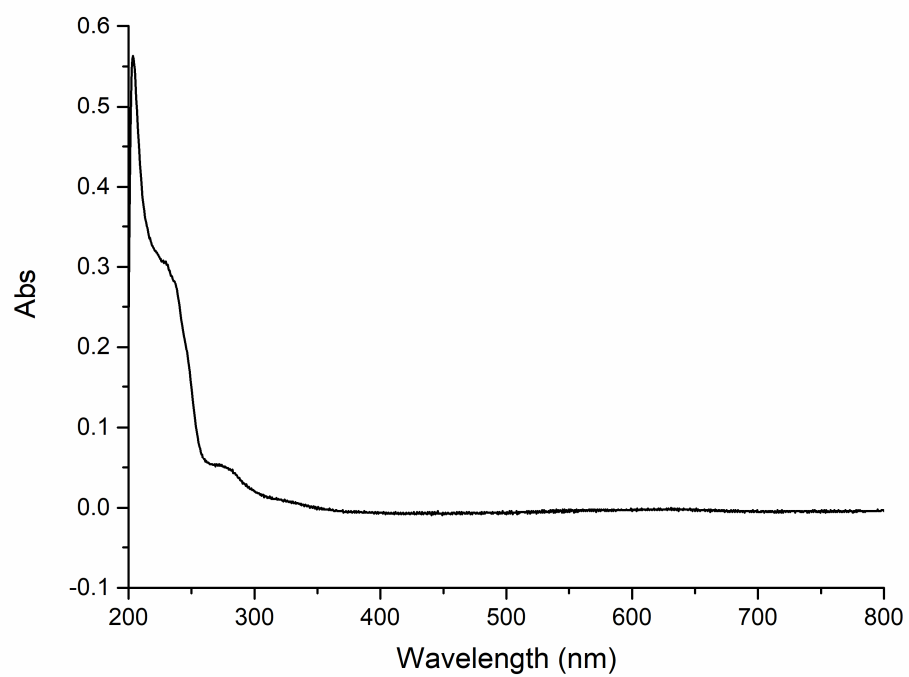

S9 IR spectrum of aspergorakhins A (1).

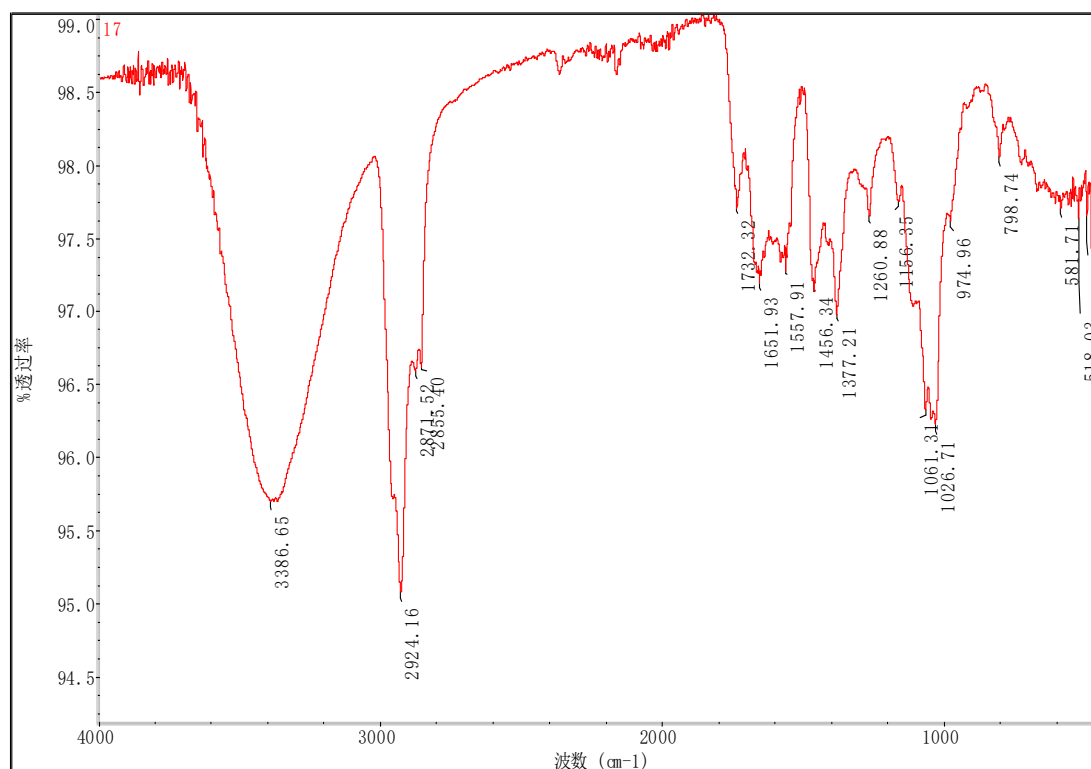

S10 <sup>1</sup>H NMR (700 MHz, CDCl<sub>3</sub>) spectrum of aspergorakhins B (2).

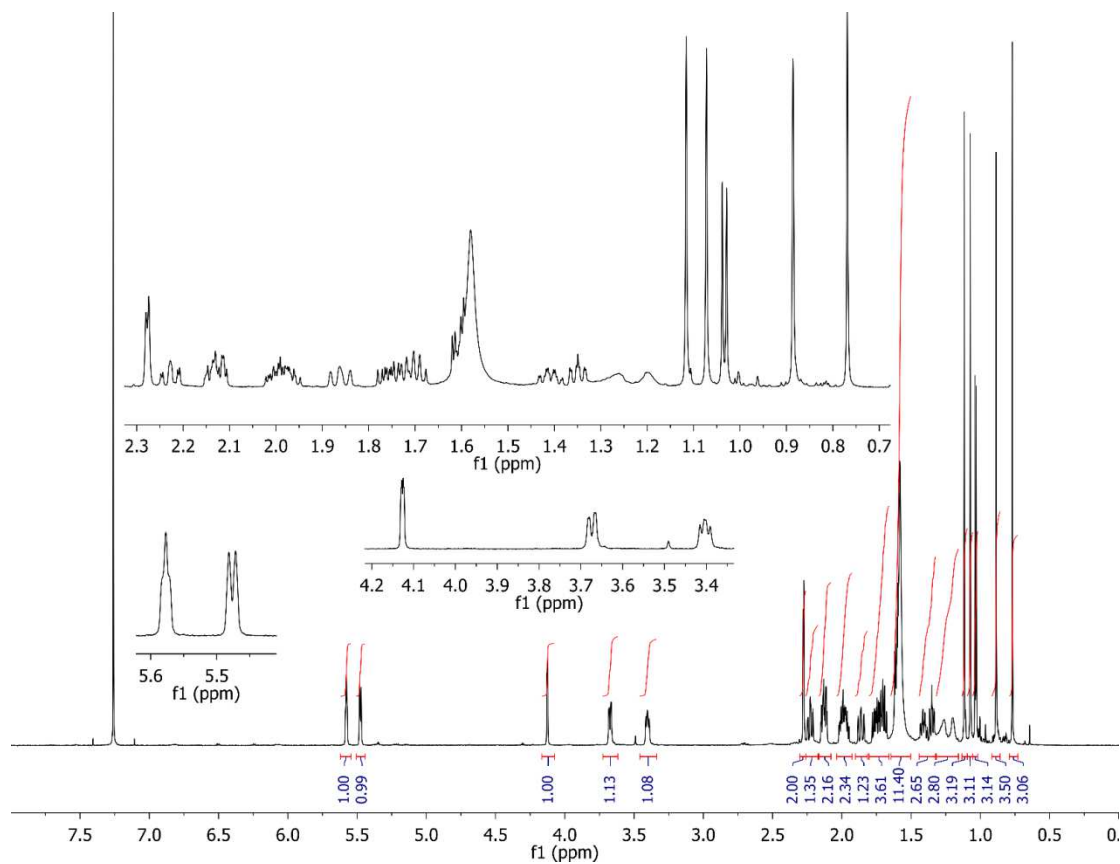

S11 <sup>13</sup>C NMR (175 MHz, CDCl<sub>3</sub>) spectrum of aspergorakhins B (2).

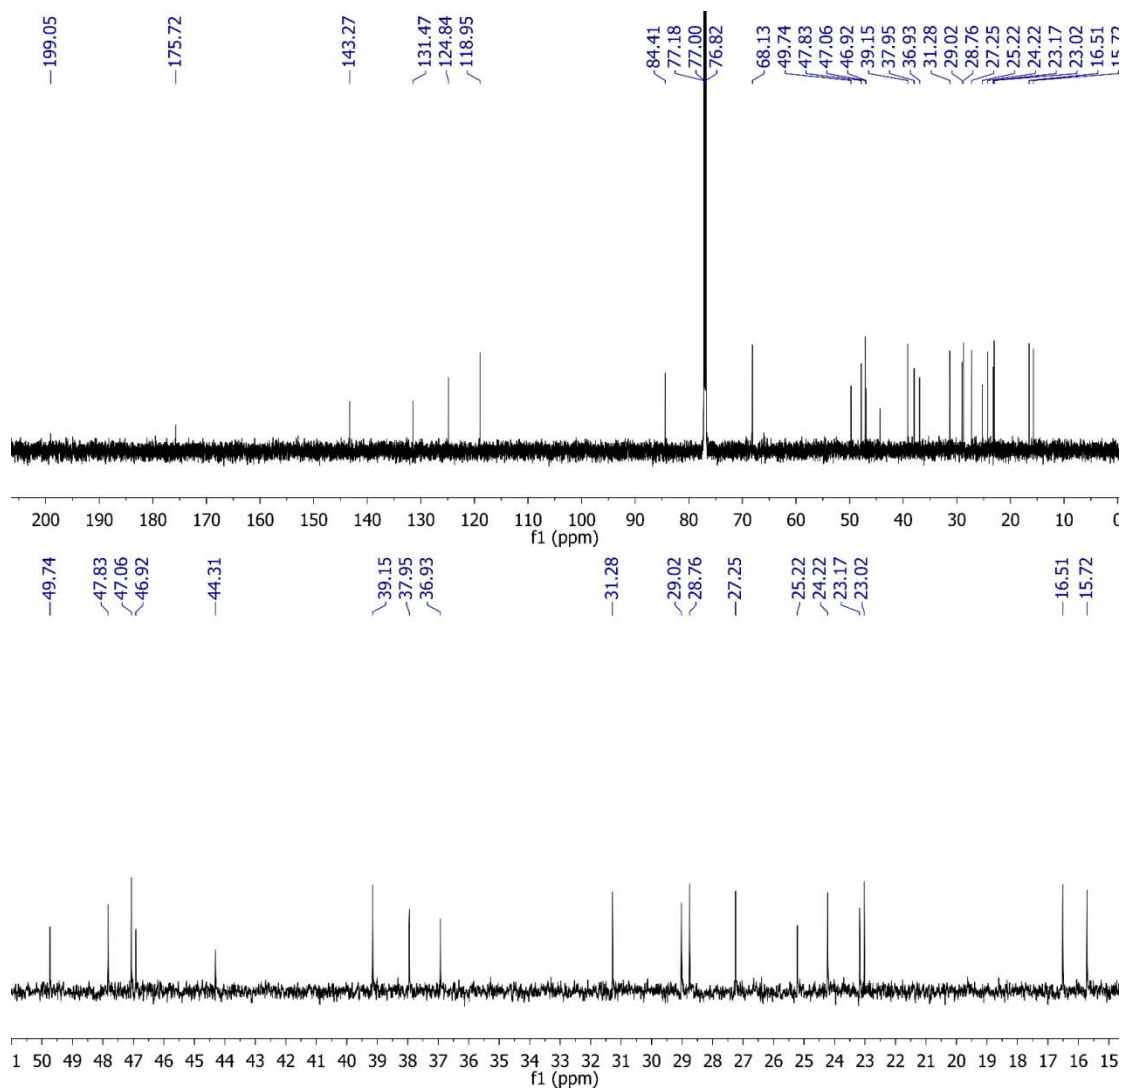

S12 DEPT135 spectrum of aspergorakhins B (2).

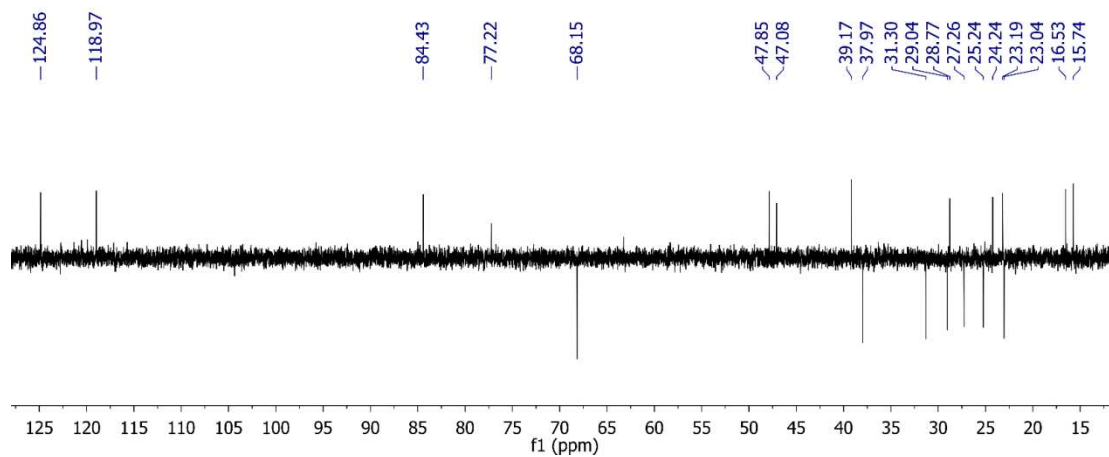

S13 HSQC spectrum of aspergorakhins B (2).

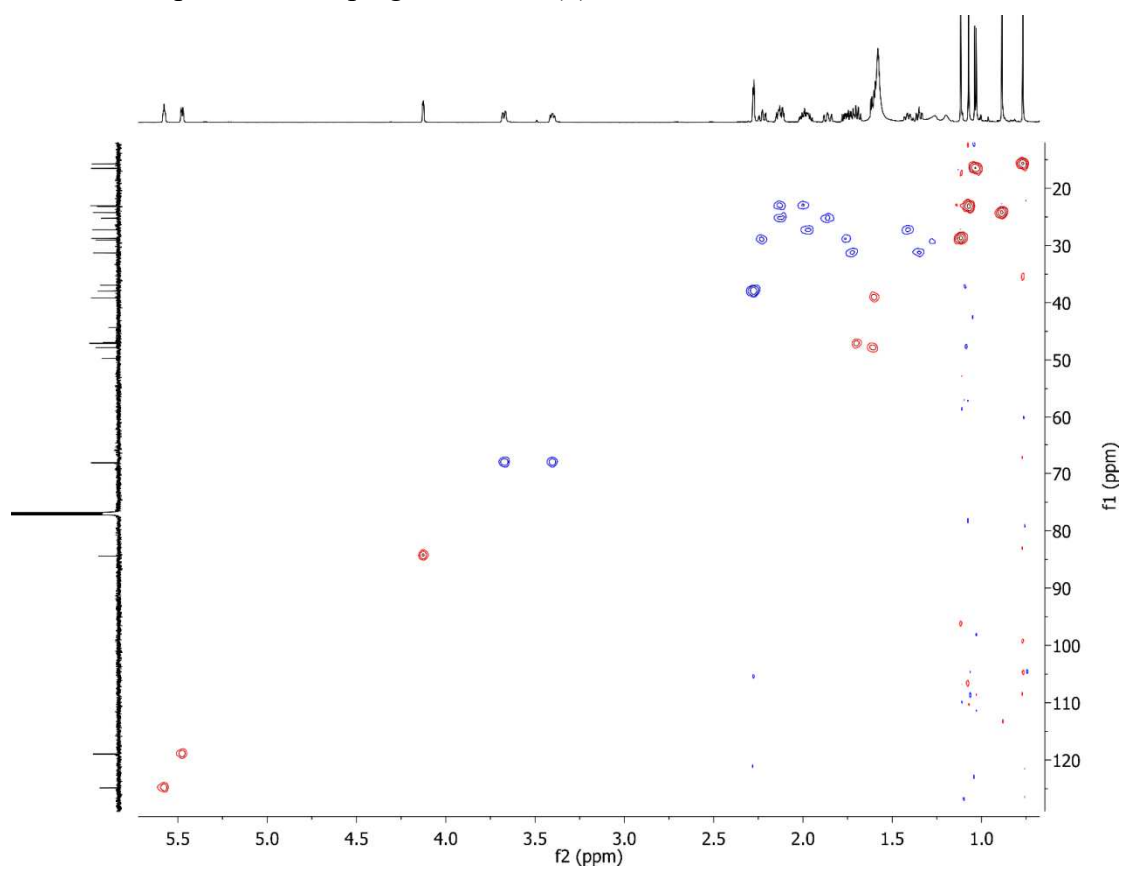

S14 COSY spectrum of aspergorakhins B (2).

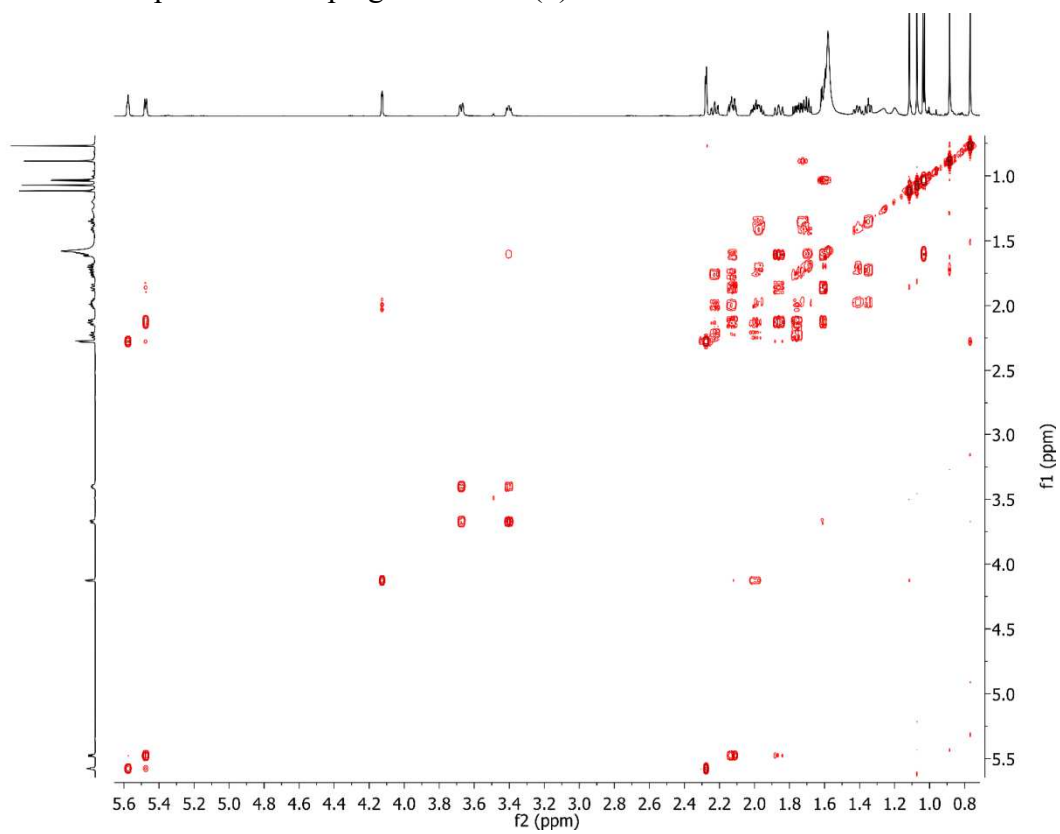

S15 HMBC spectrum of aspergorakhins B (2).

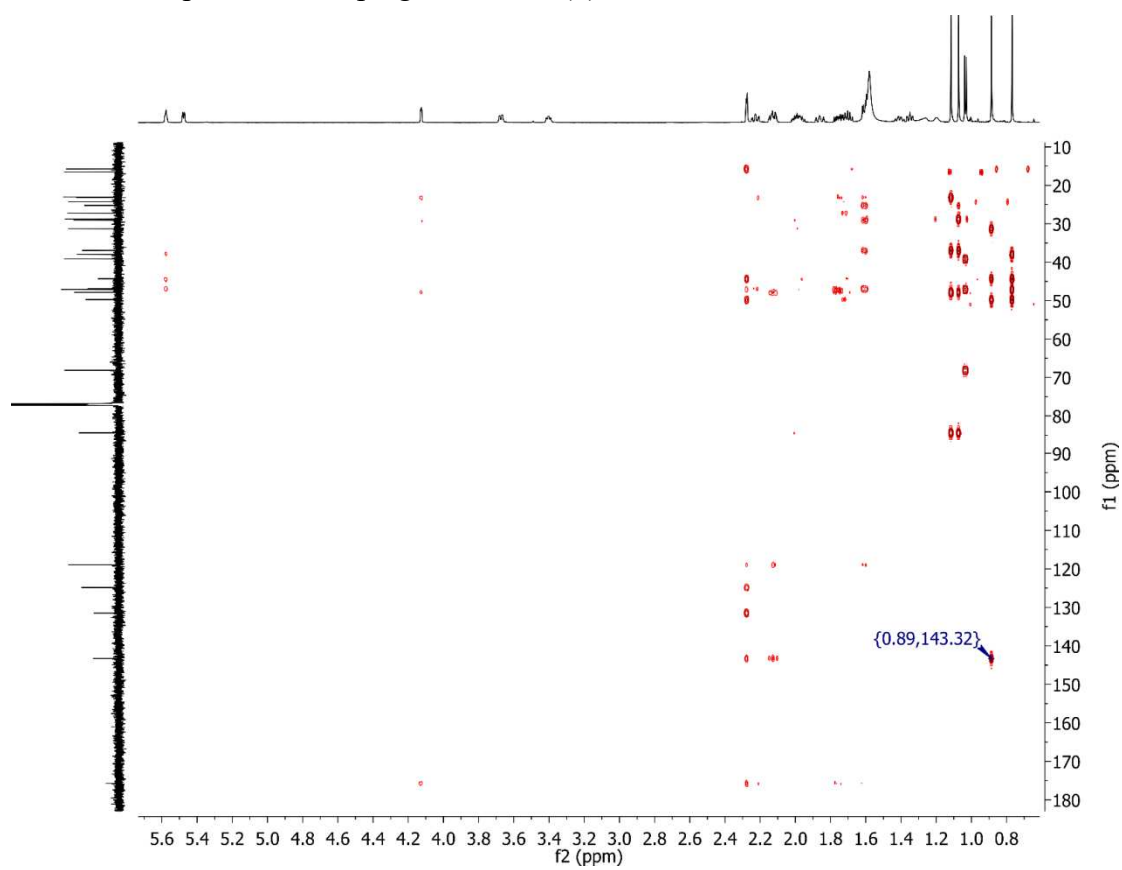

S16 NOESY spectrum of aspergorakhins B (2).

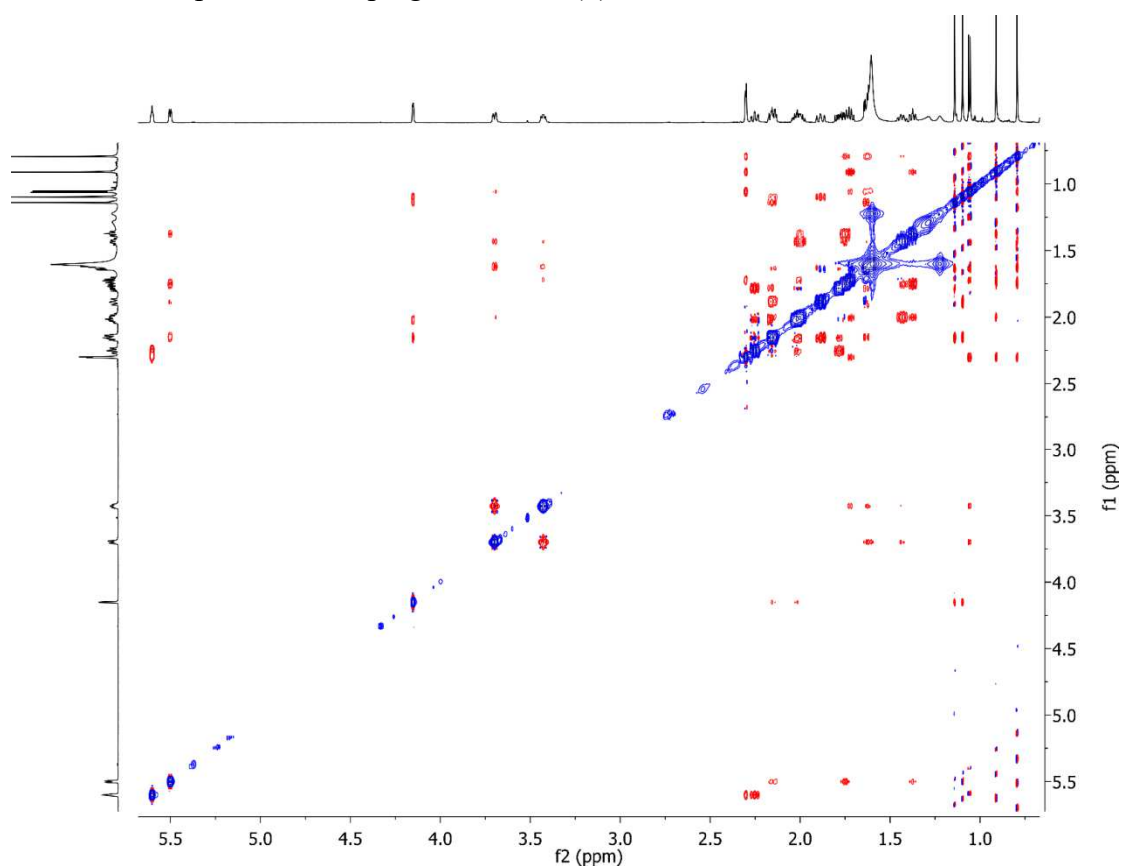

### S17 (+)-HRESIMS spectrum of aspergorakhins B (2).

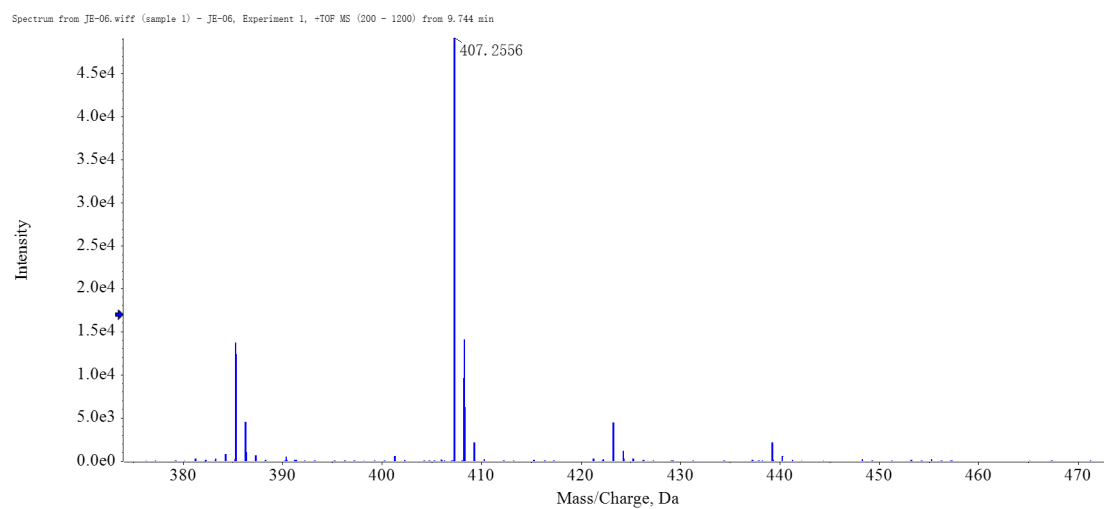

### S18 UV spectrum of aspergorakhins B (2).

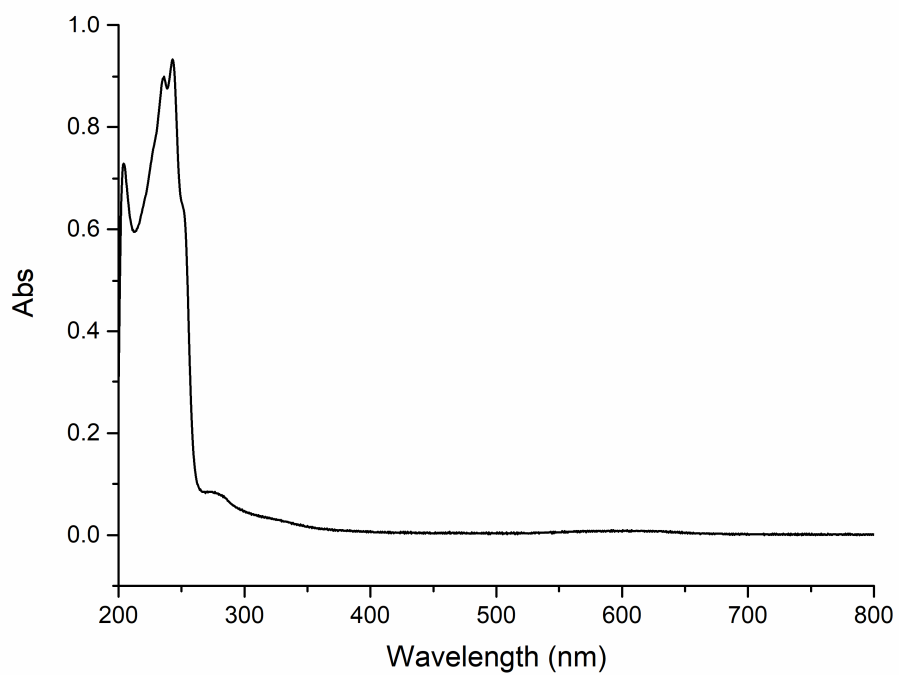

**S19** IR spectrum of aspergorakhins B (2).

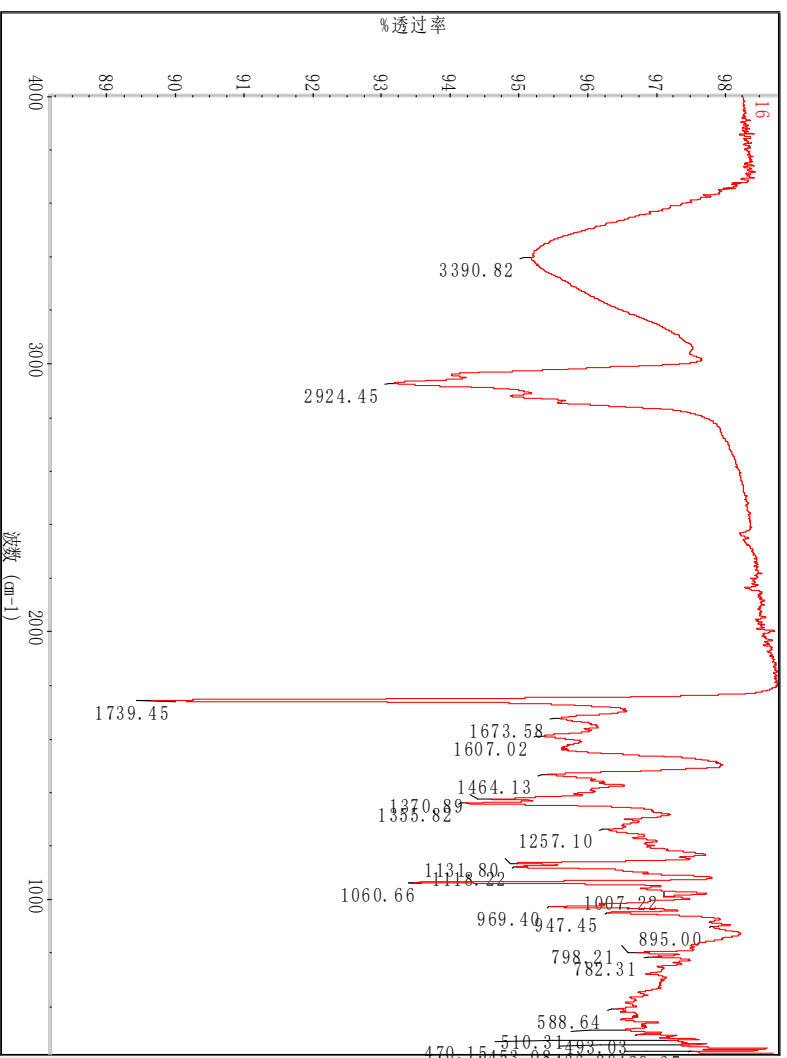

**S20** <sup>1</sup>H NMR (700 MHz, CD<sub>3</sub>OD) spectrum of aspergorakhins C (3).

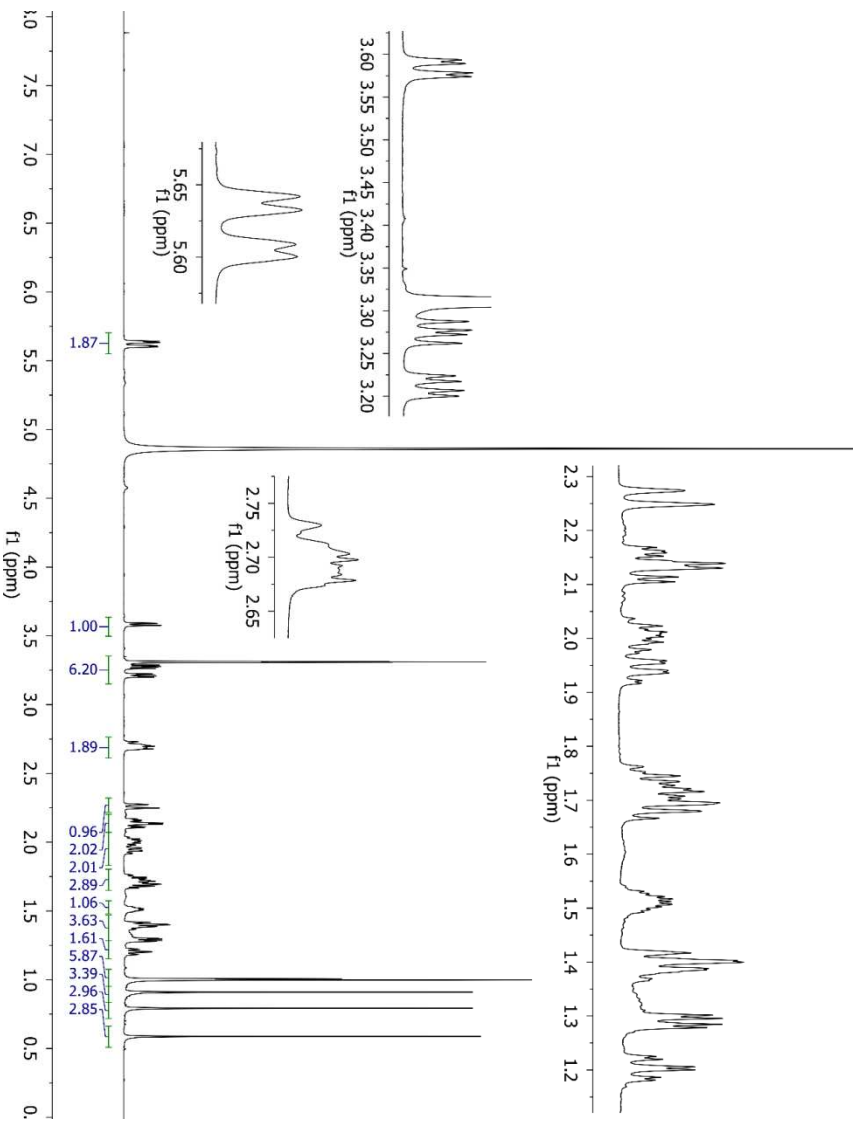

S21  $^{13}\text{C}$  NMR (175 MHz,  $\text{CD}_3\text{OD}$ ) spectrum of aspergorakhins C (3).

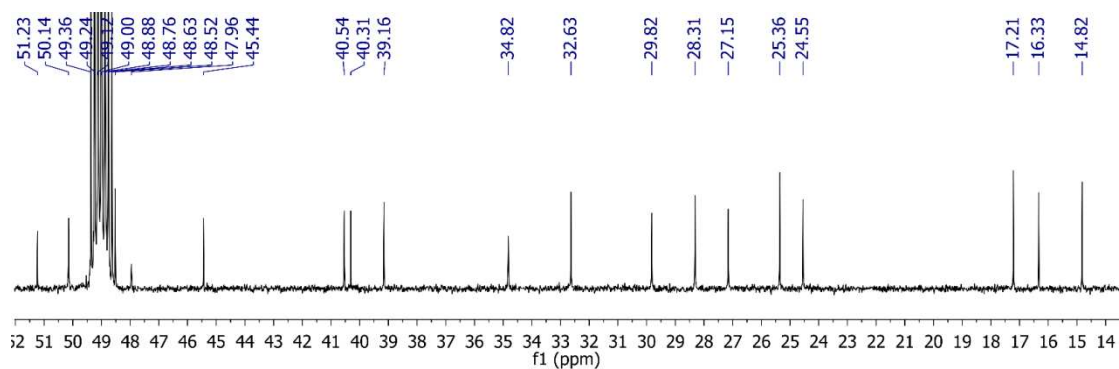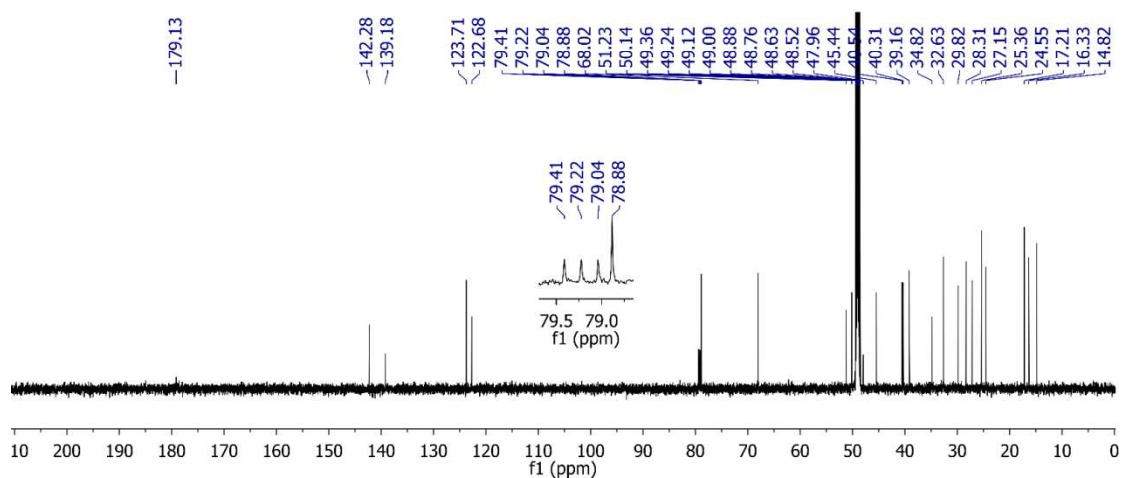

S22 DEPT135 spectrum of aspergorakhins C (3).

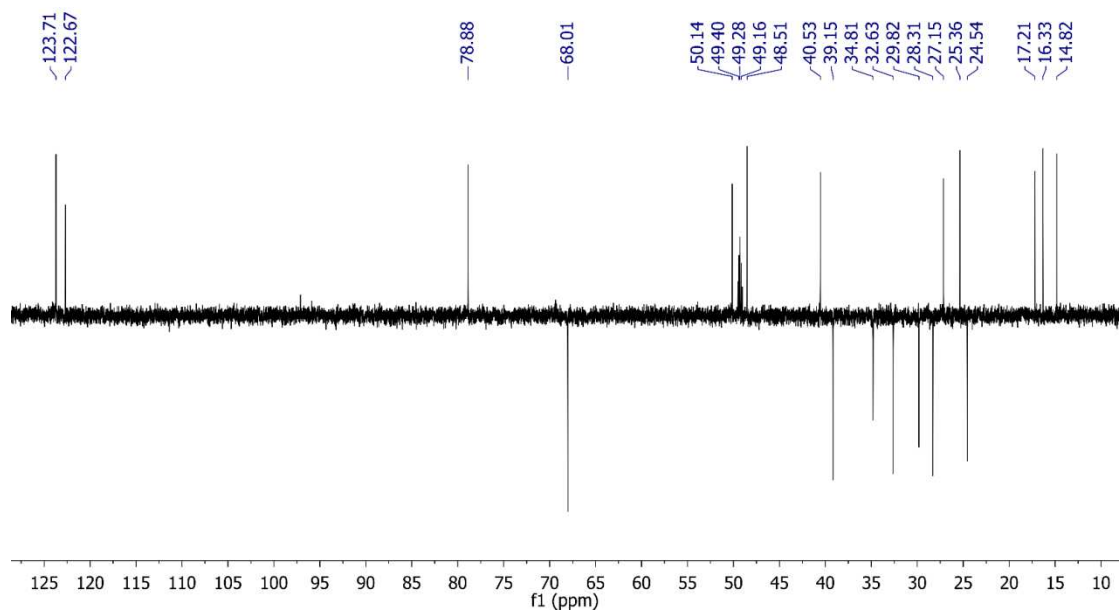



S23 HSQC spectrum of aspergorakhins C (3).

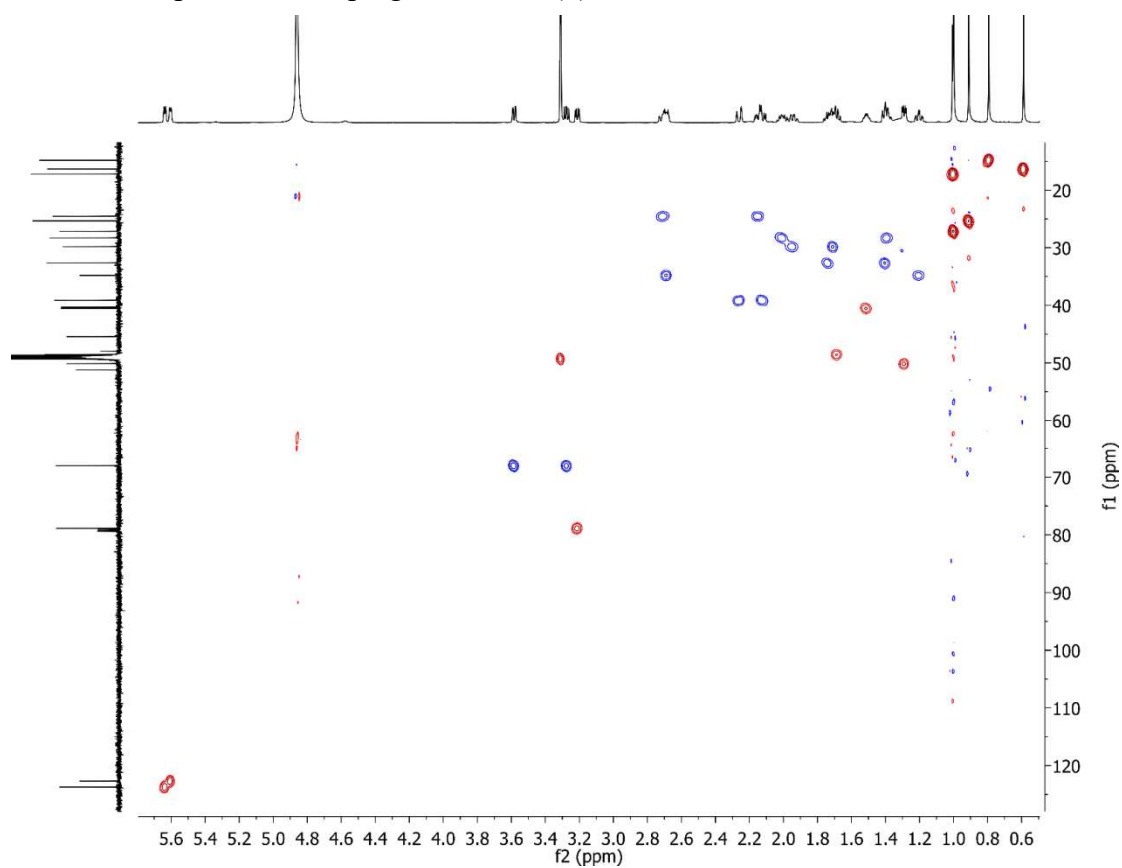

S24 COSY spectrum of aspergorakhins C (3).

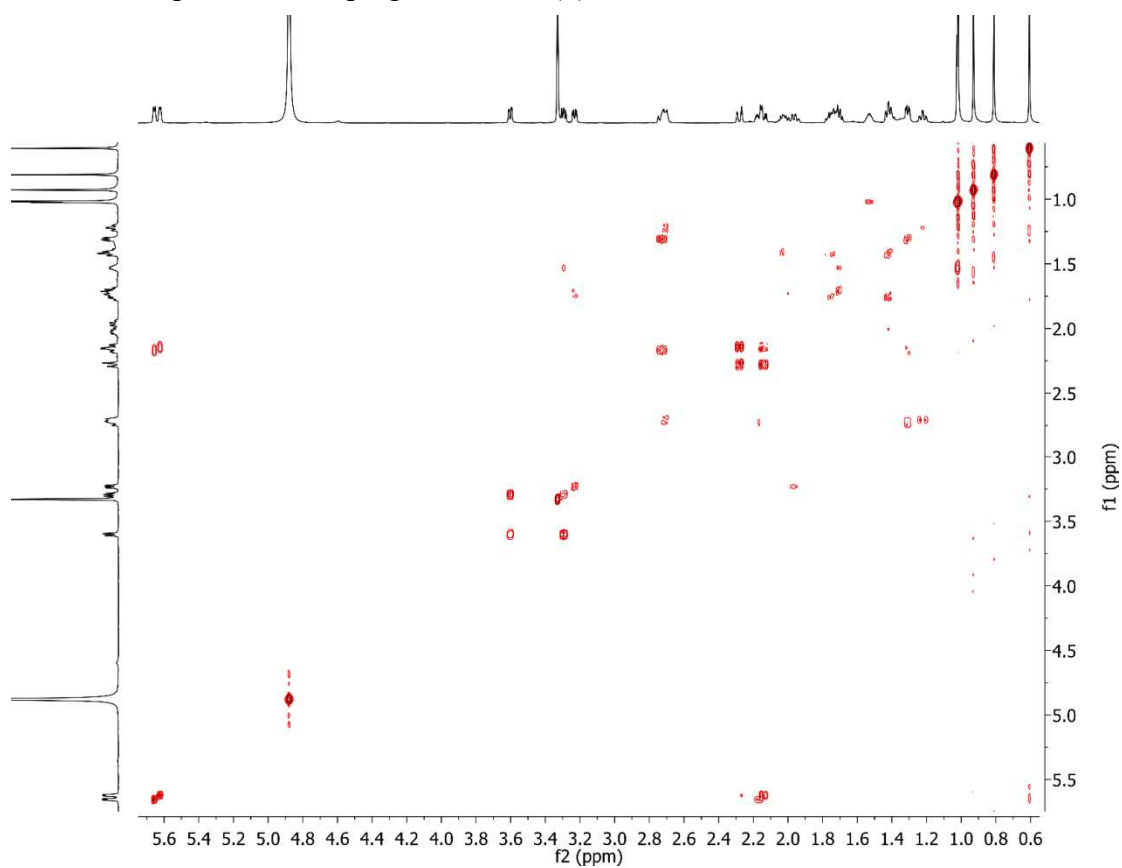

S25 HMBC spectrum of aspergorakhins C (3).

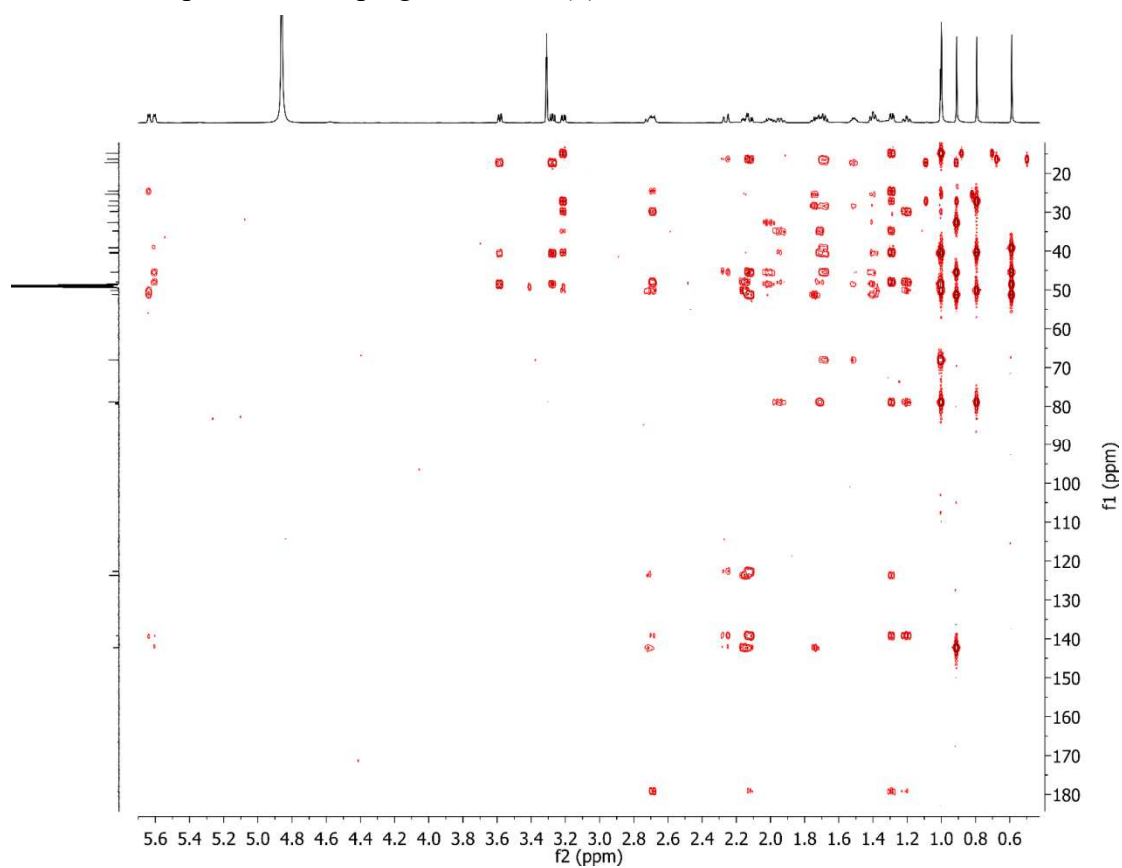

S26 NOESY spectrum of aspergorakhins C (3).

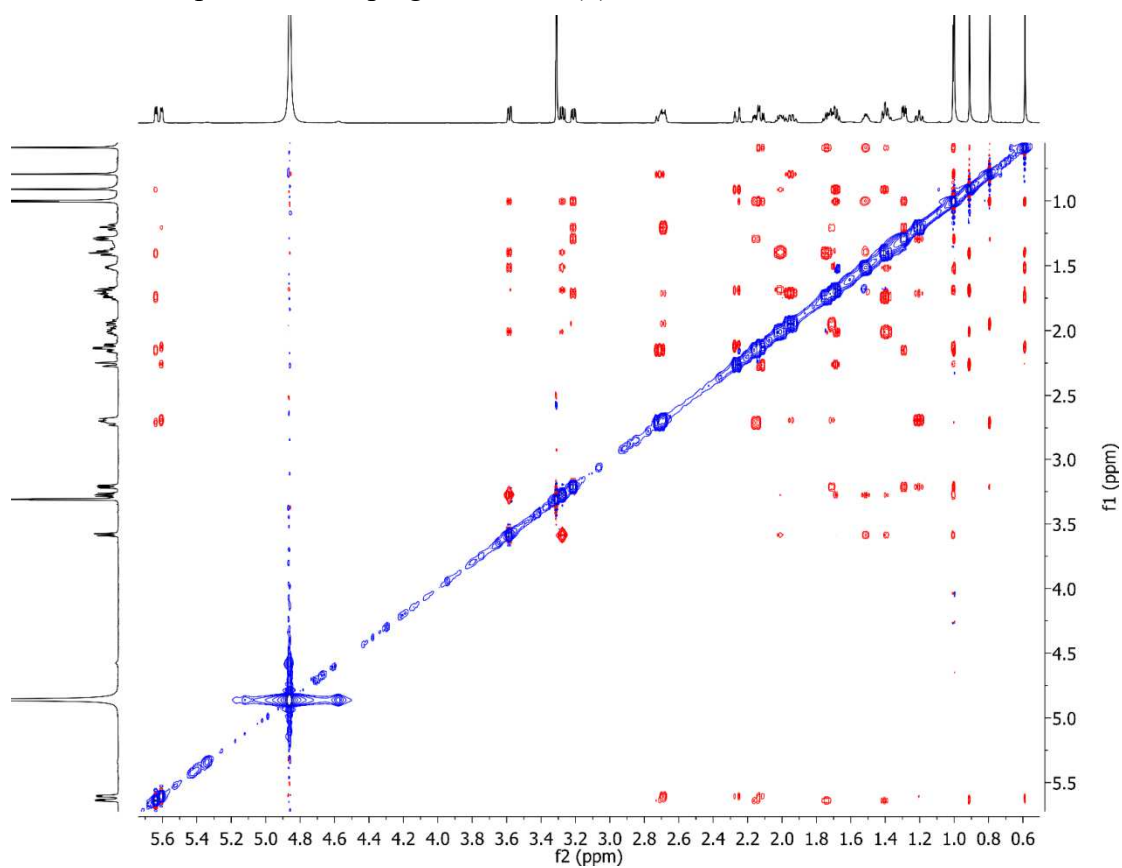

### S27 (+)-HRESIMS spectrum of aspergorakhins C (3).

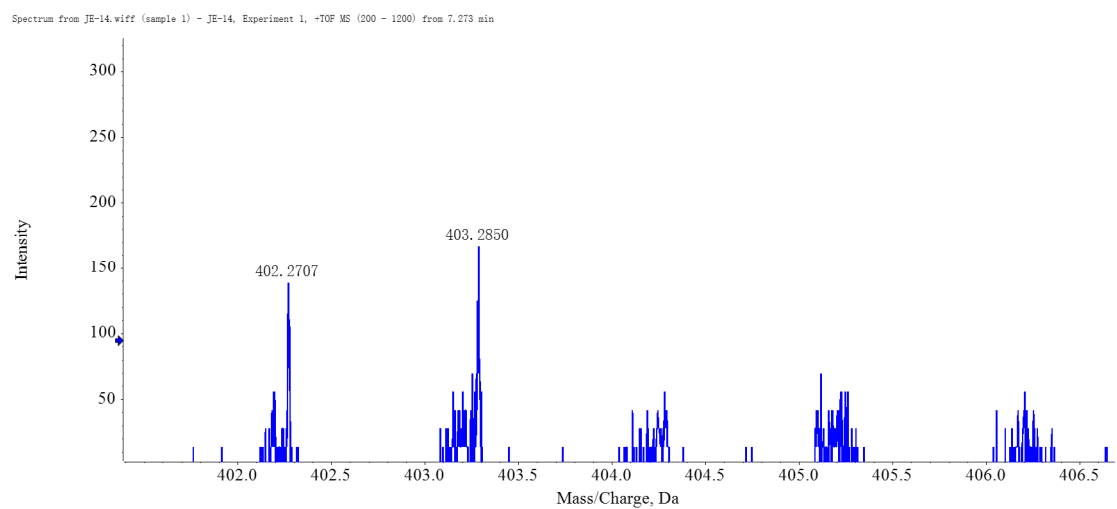

### S28 UV spectrum of aspergorakhins C (3).

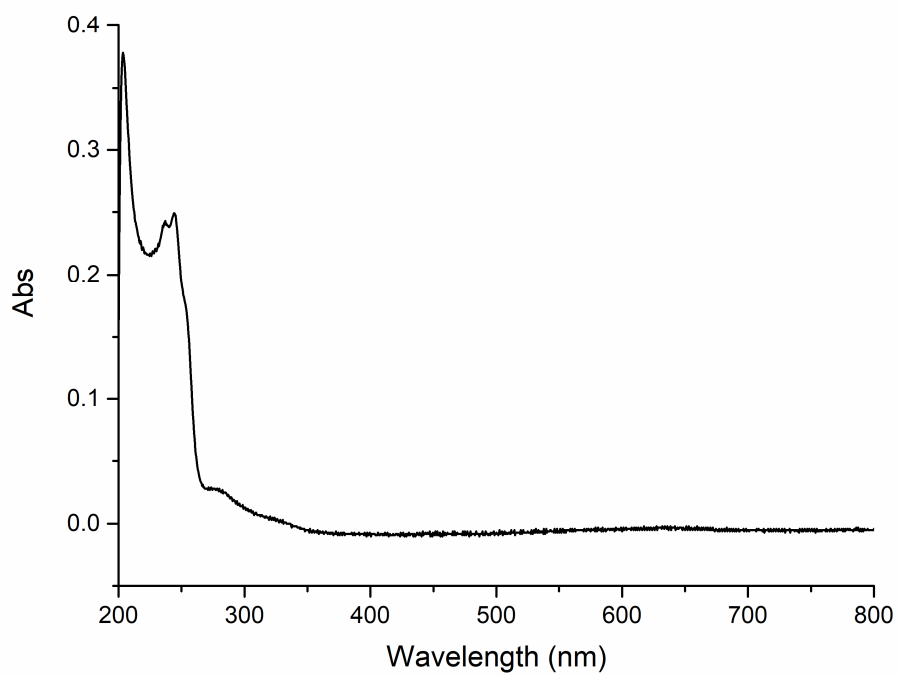

S29 IR spectrum of aspergorakhins C (3).

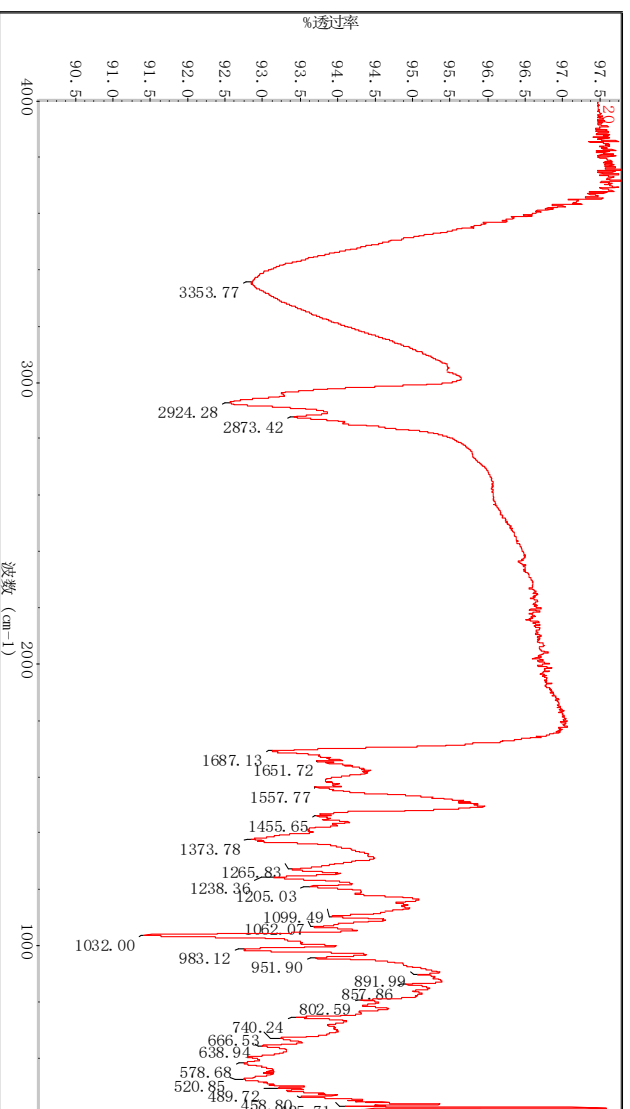

S30 <sup>1</sup>H NMR (700 MHz, CD<sub>3</sub>OD) spectrum of aspergorakhins D (4).

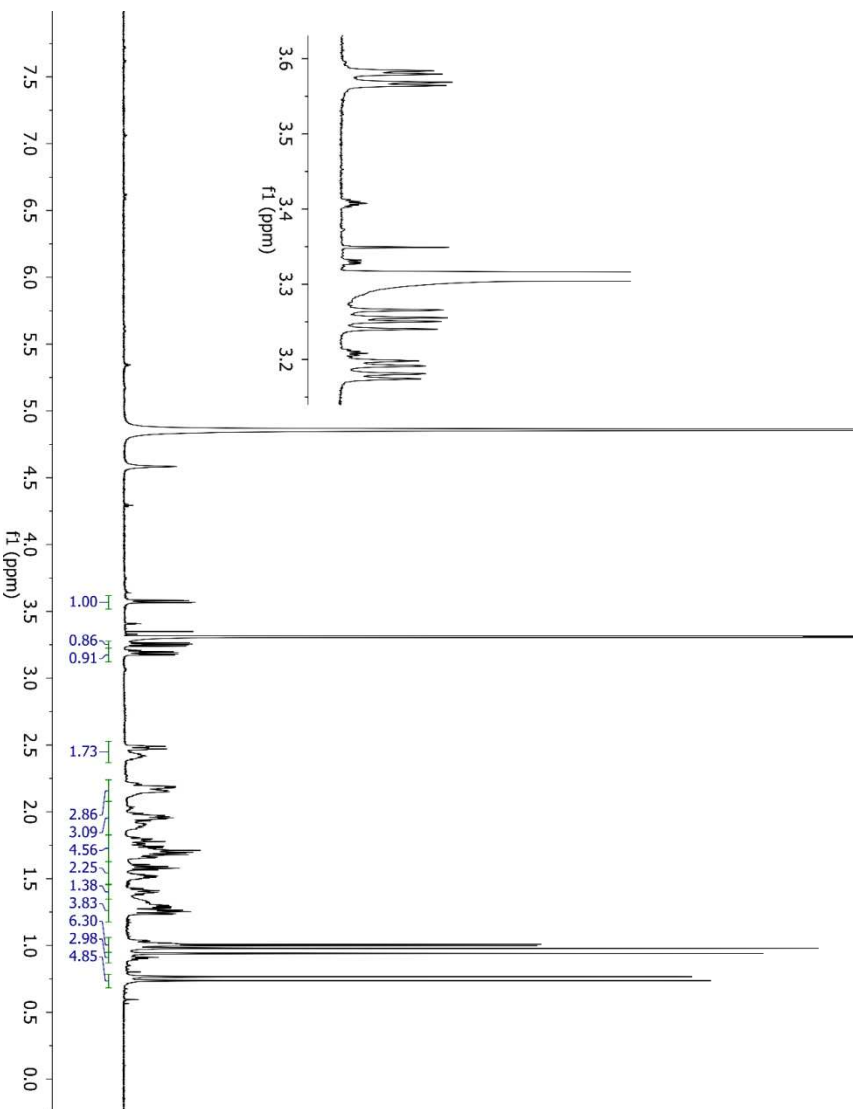

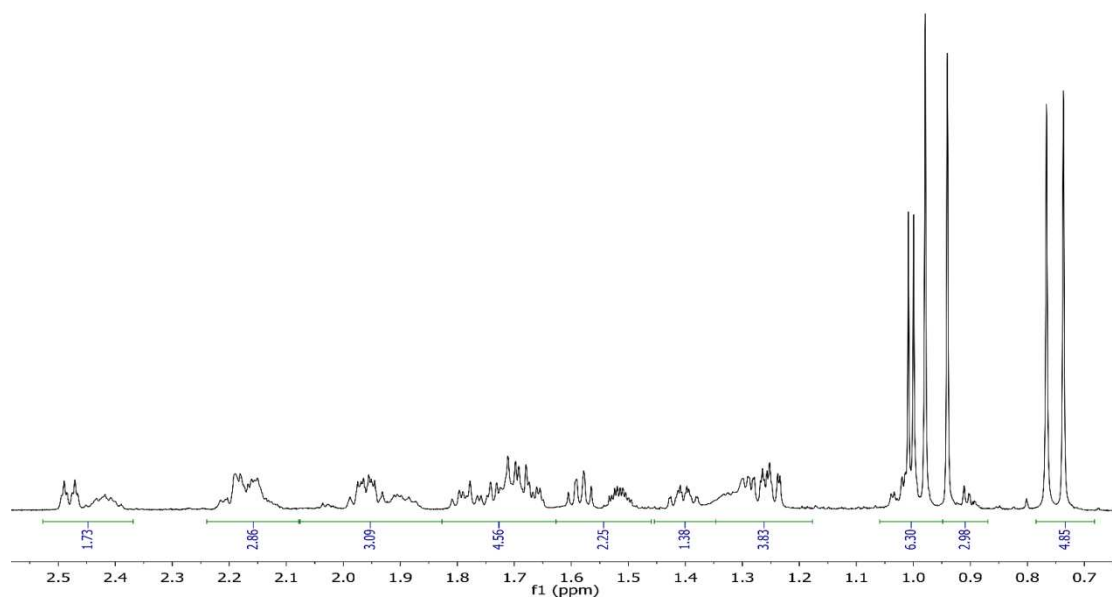

S31  $^{13}\text{C}$  NMR (175 MHz,  $\text{CD}_3\text{OD}$ ) spectrum of aspergorakhins D (4).

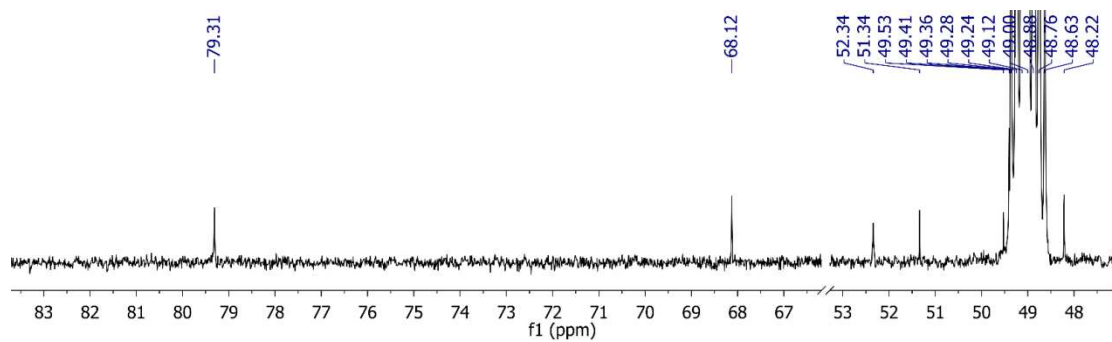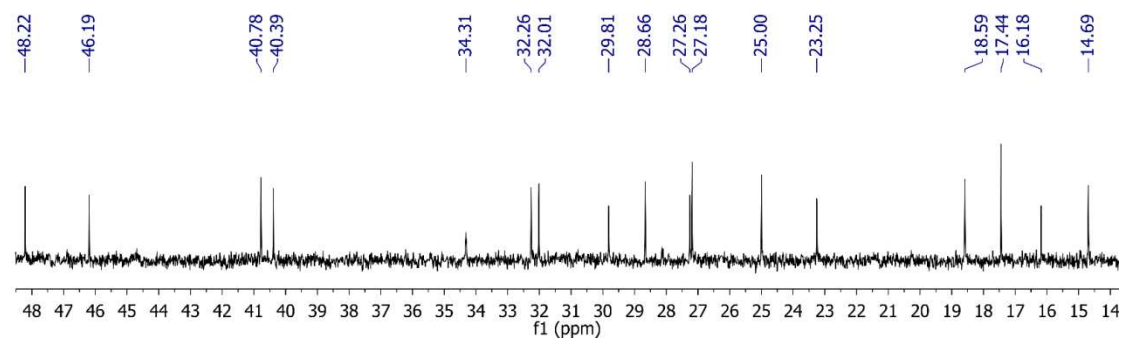

S32 DEPT135 spectrum of aspergorakhins D (4).

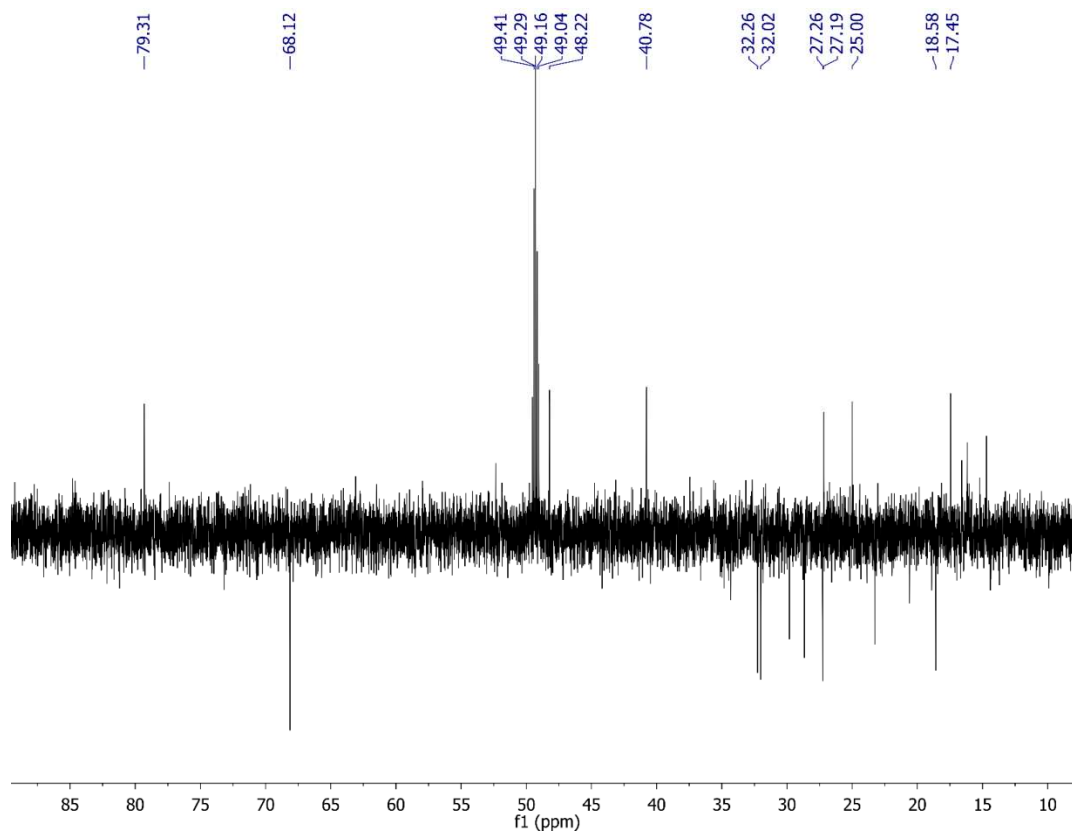

S33 HSQC spectrum of aspergorakhins D (4).

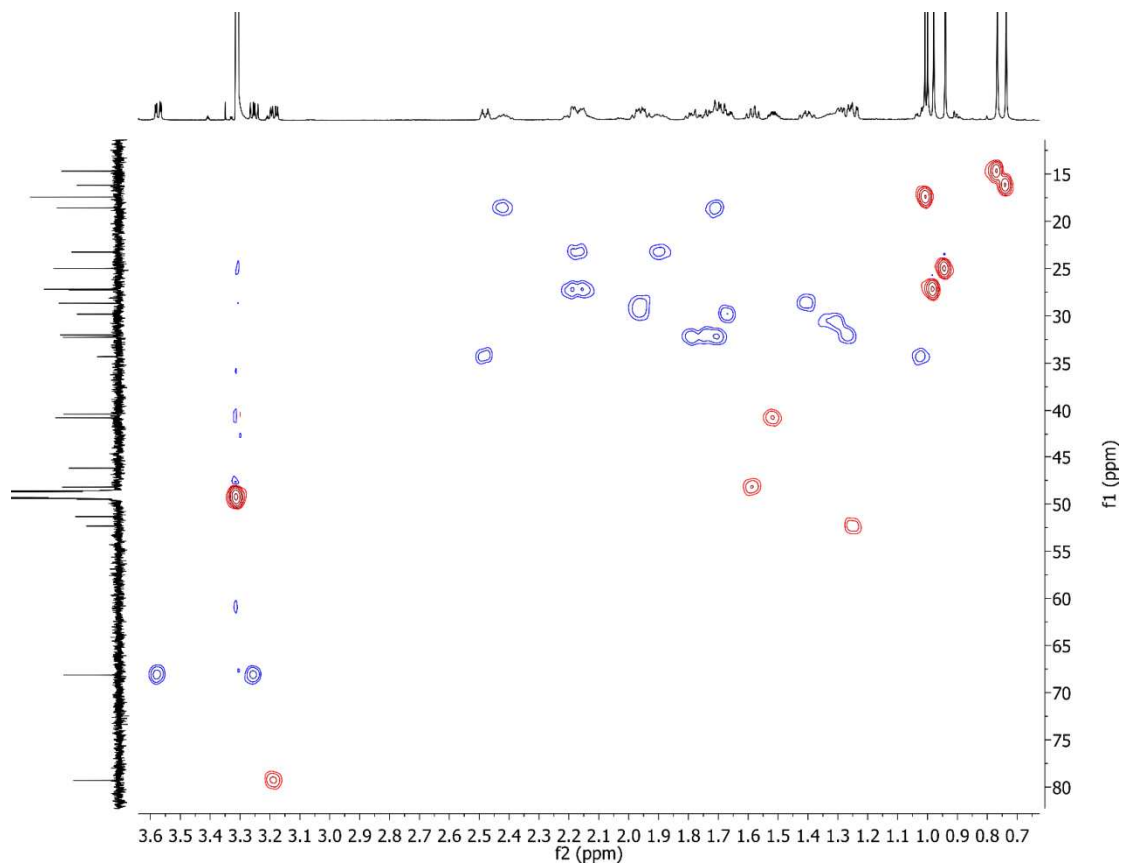

S34 COSY spectrum of aspergorakhins D (4).

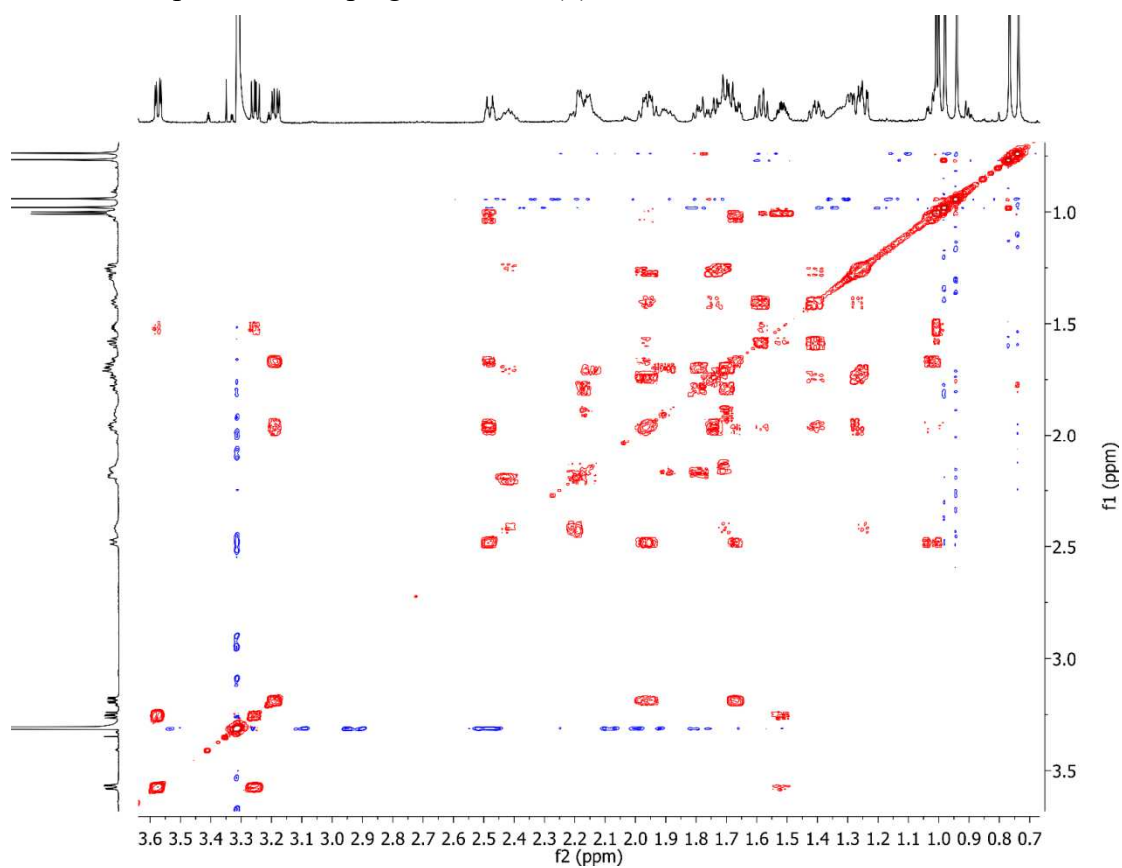

S35 HMBC spectrum of aspergorakhins D (4).

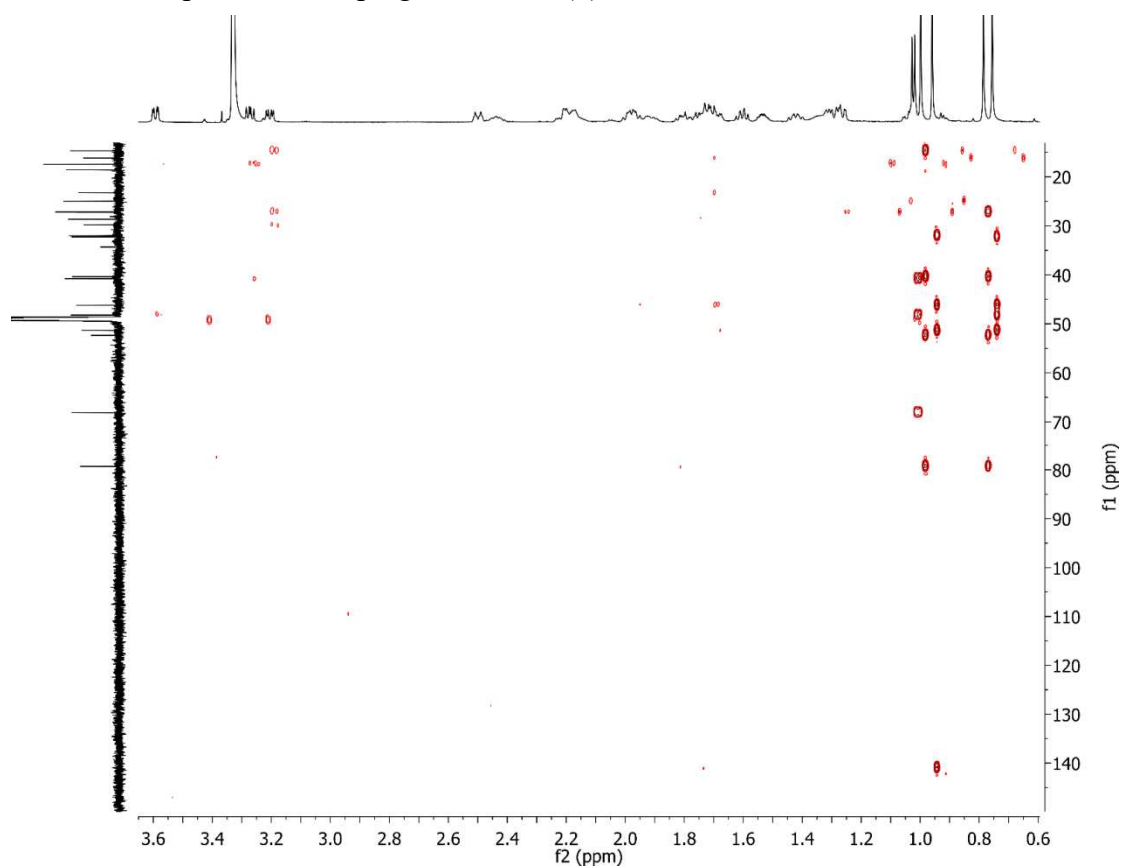

S36 NOESY spectrum of aspergorakhins D (4).

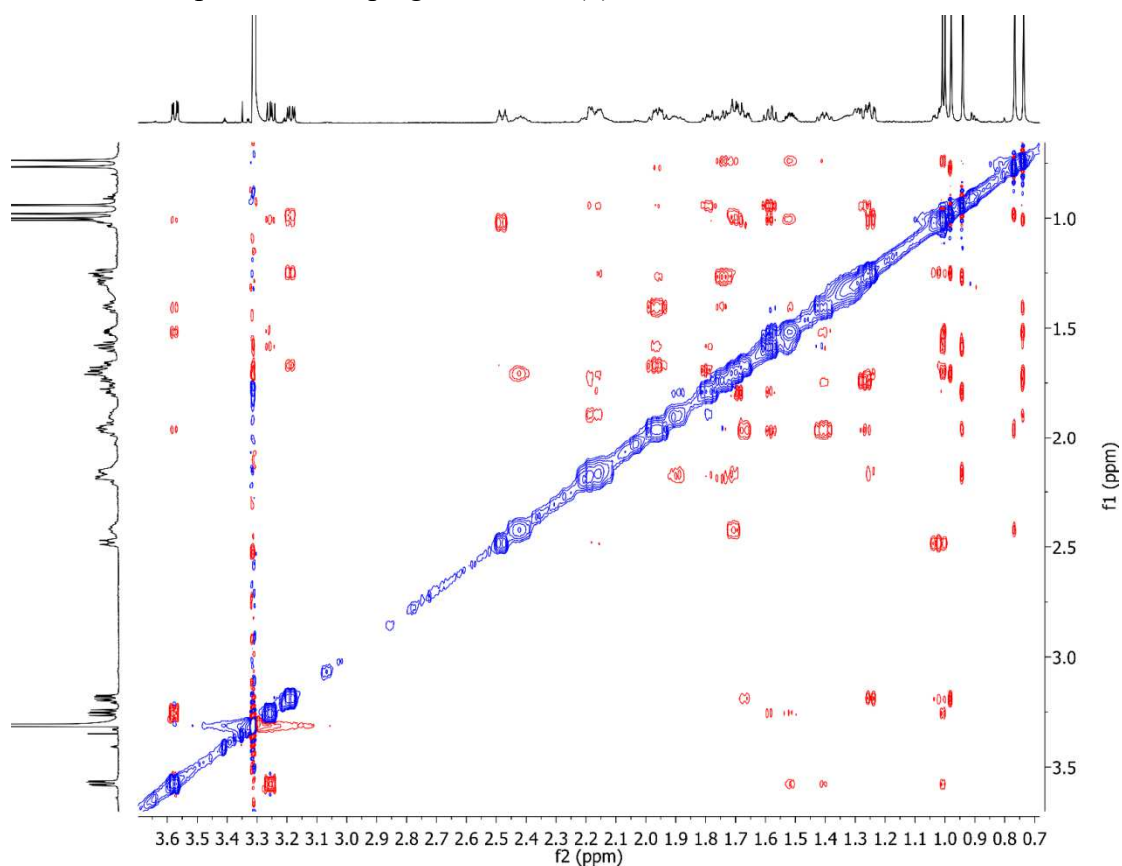

S37 (+)-HRESIMS spectrum of aspergorakhins D (4).

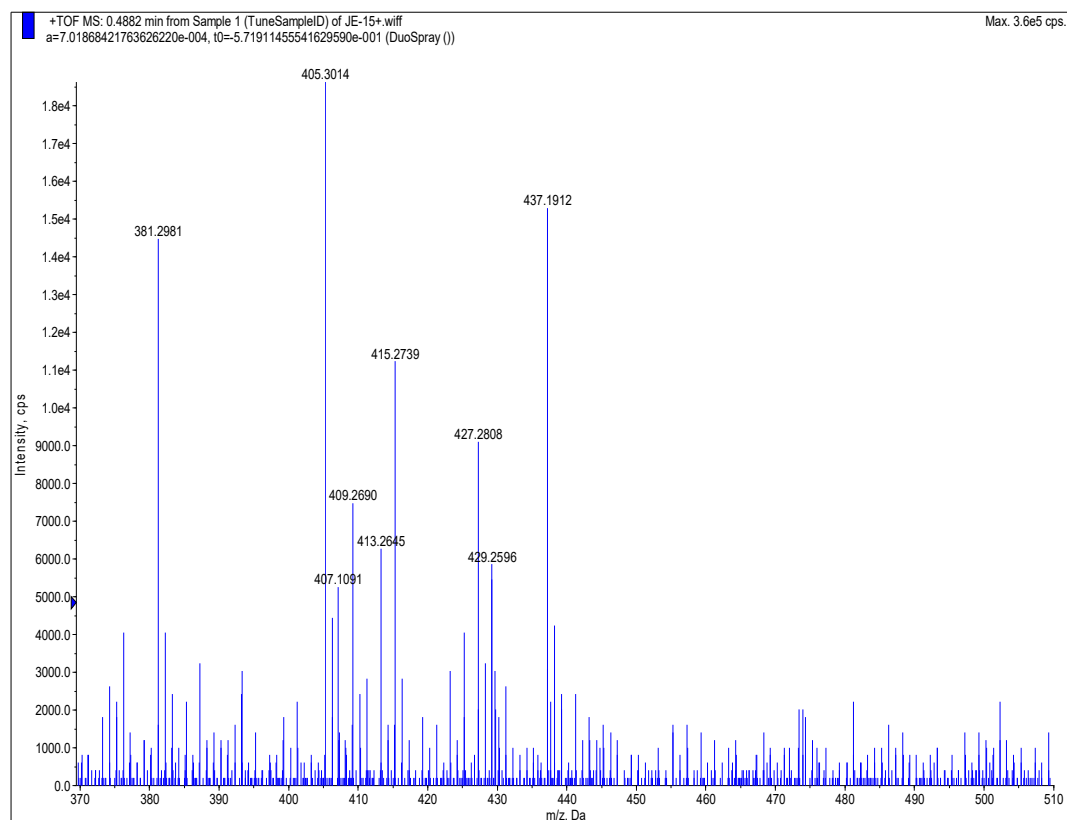



S38 UV spectrum of aspergorakhins D (4).

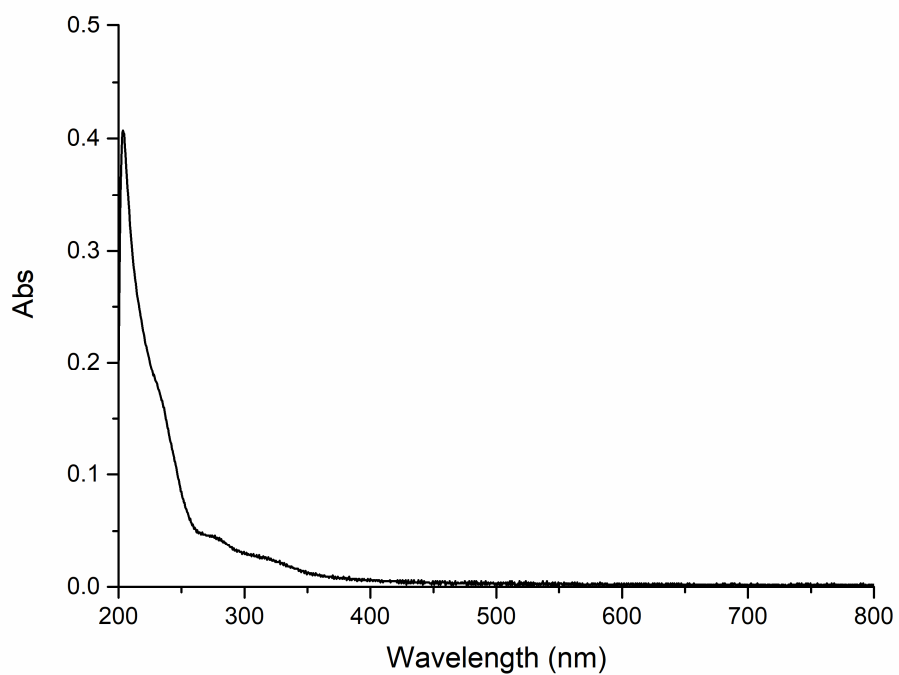

S39 IR spectrum of aspergorakhins D (4).

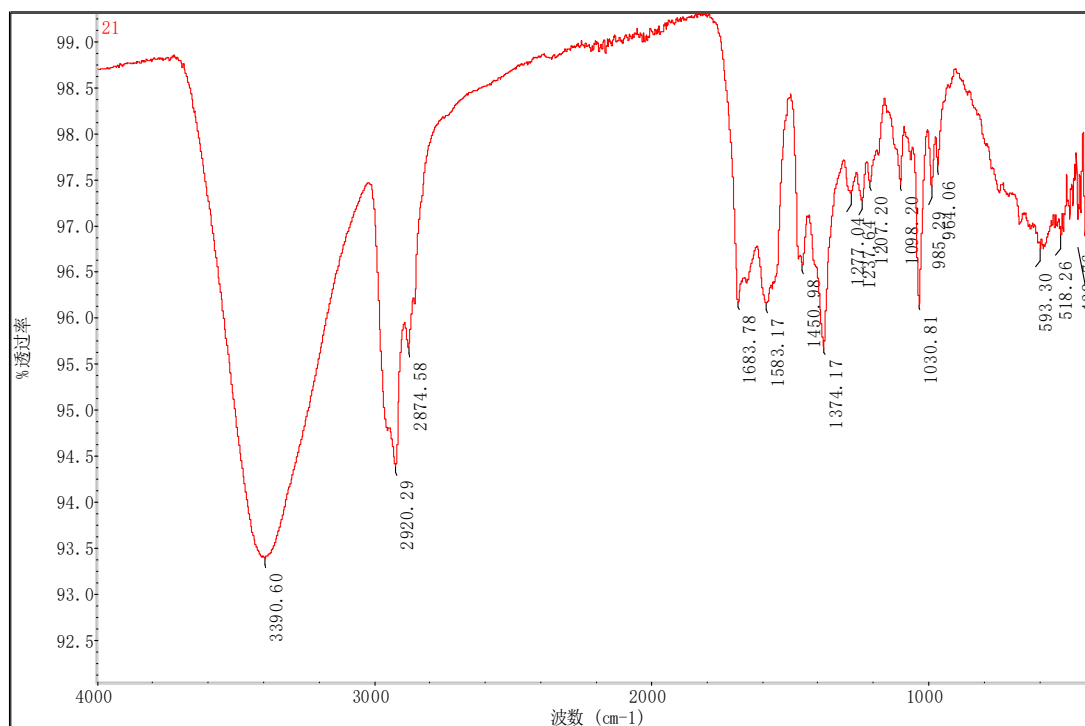

S40  $^1\text{H}$  NMR (600 MHz,  $\text{CD}_3\text{OD}$ ) spectrum of aspergorakhins E (5).

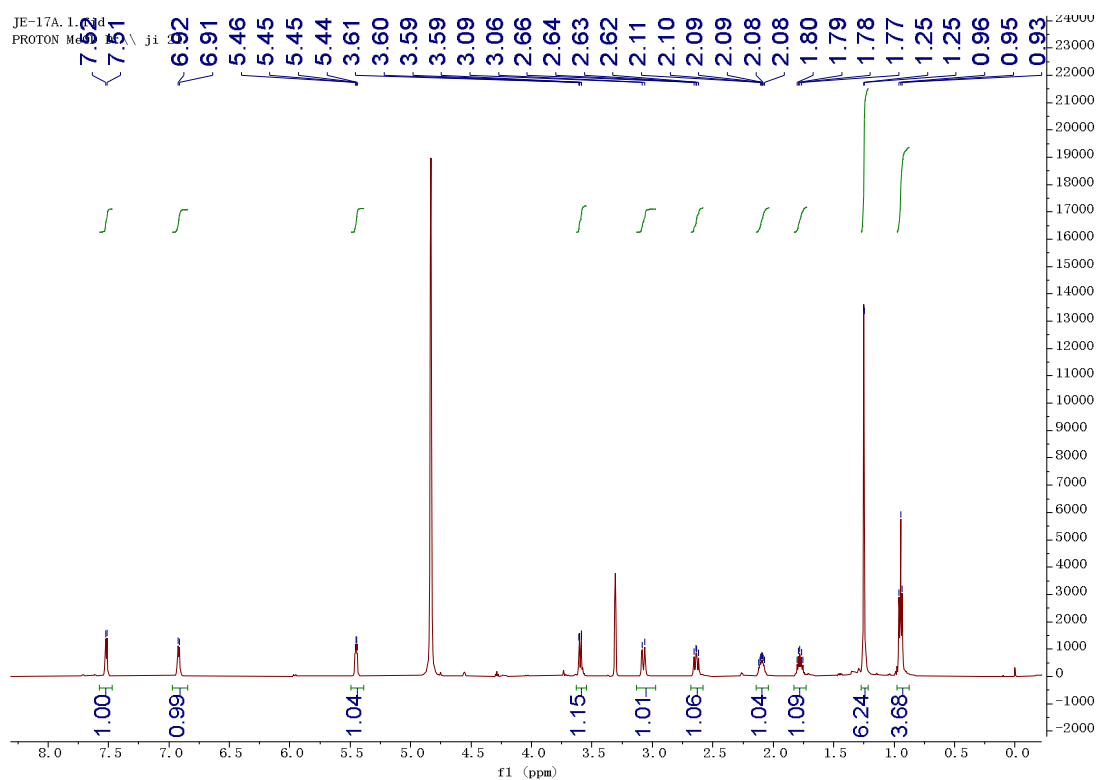

S41  $^{13}\text{C}$  NMR (150 MHz,  $\text{CD}_3\text{OD}$ ) spectrum of aspergorakhins E (5).

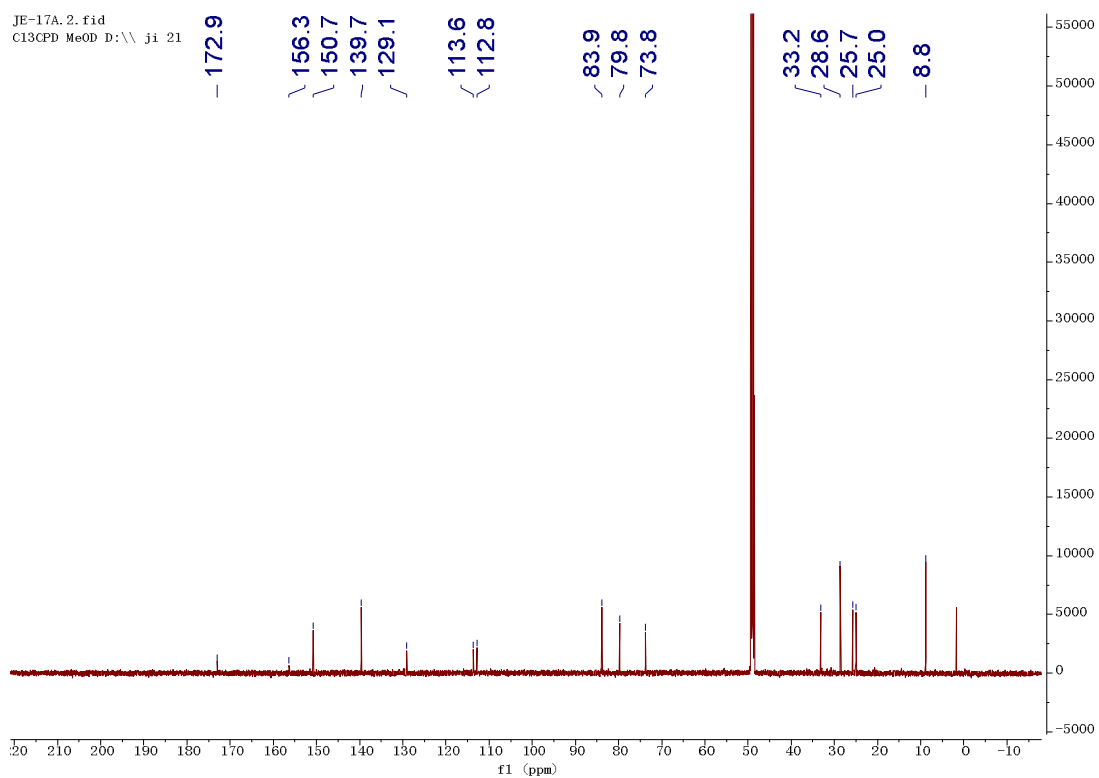

S42 HSQC spectrum of aspergorakhins E (5).

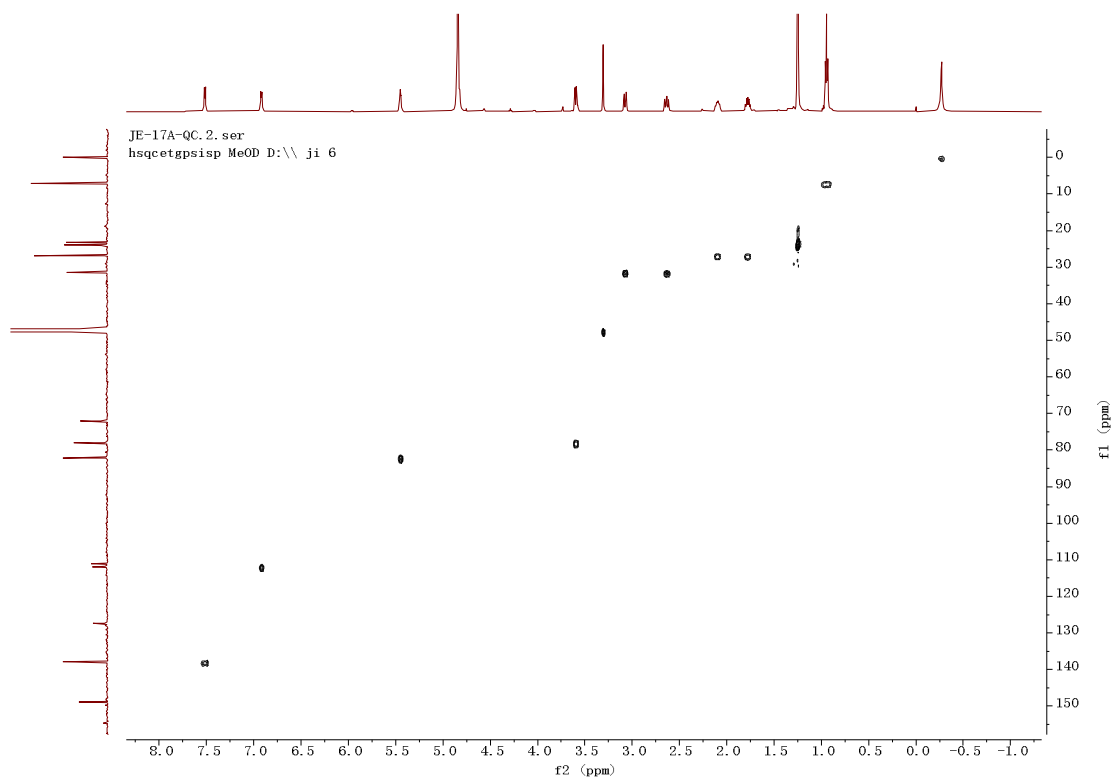

S43 COSY spectrum of aspergorakhins E (5).

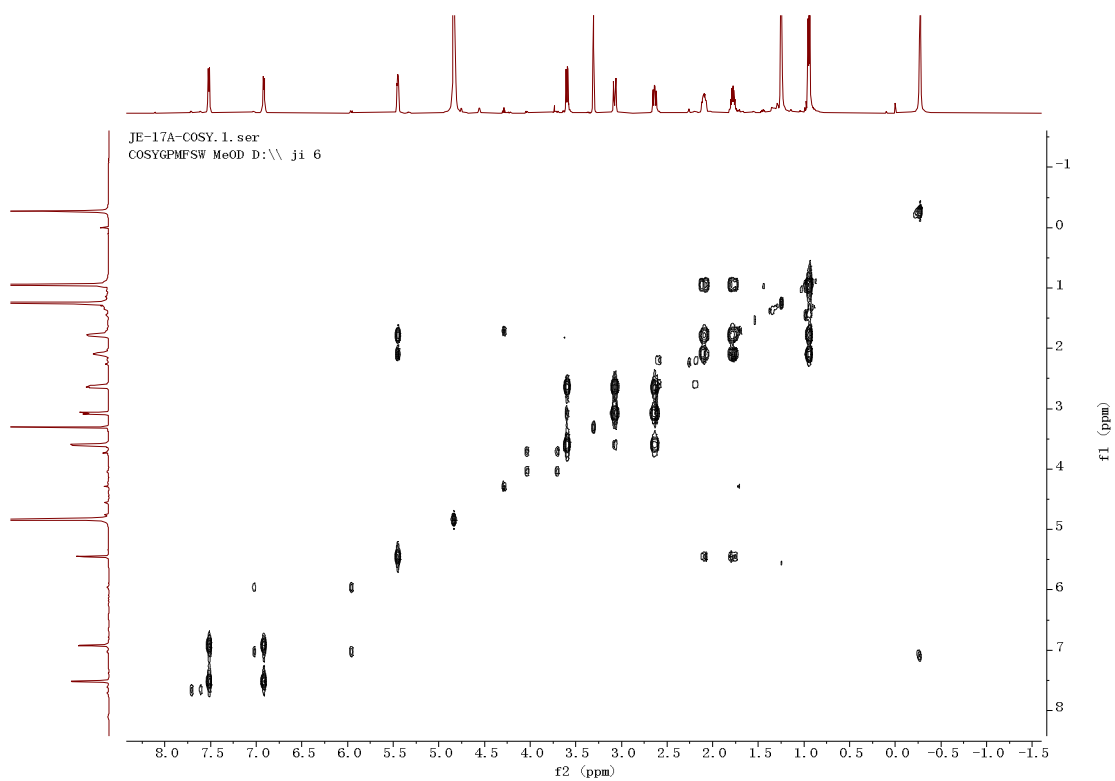

S44 HMBC spectrum of aspergorakhins E (5).

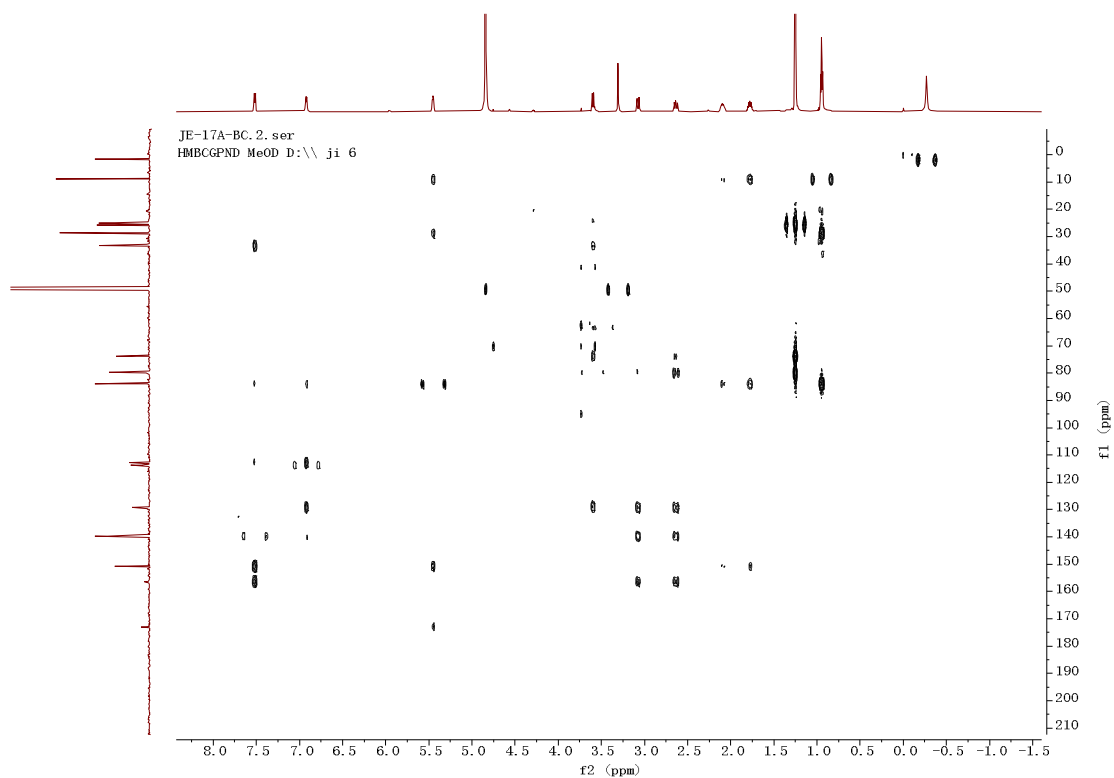

S45 ESIMS spectrum of aspergorakhins E (5).

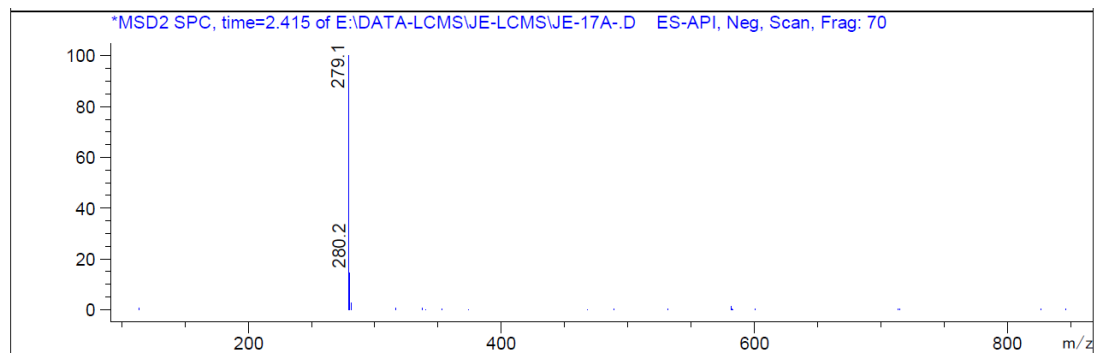

**S46 (+)-HRESIMS spectrum of aspergorakhins E (5).**

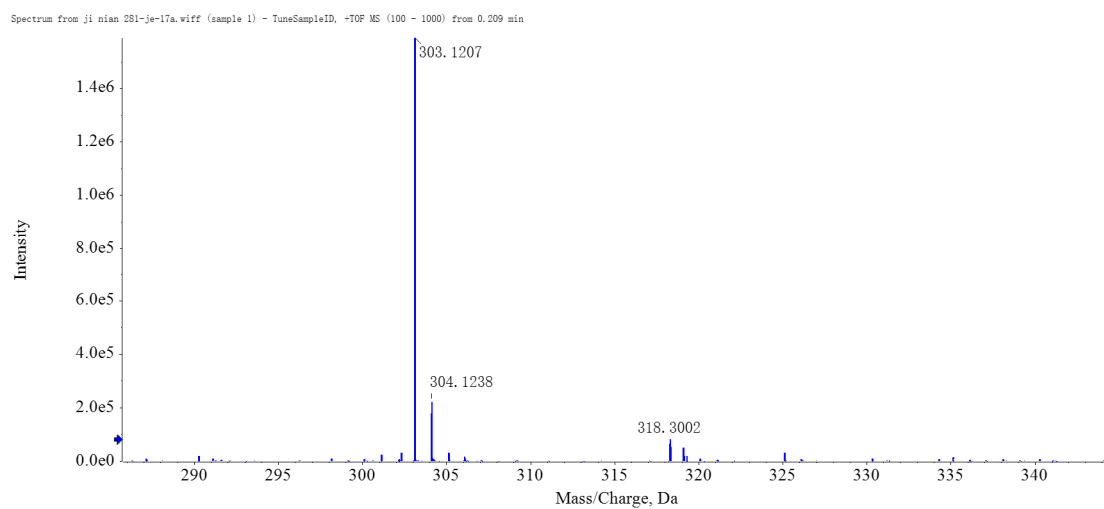

**S47 UV spectrum of aspergorakhins E (5).**

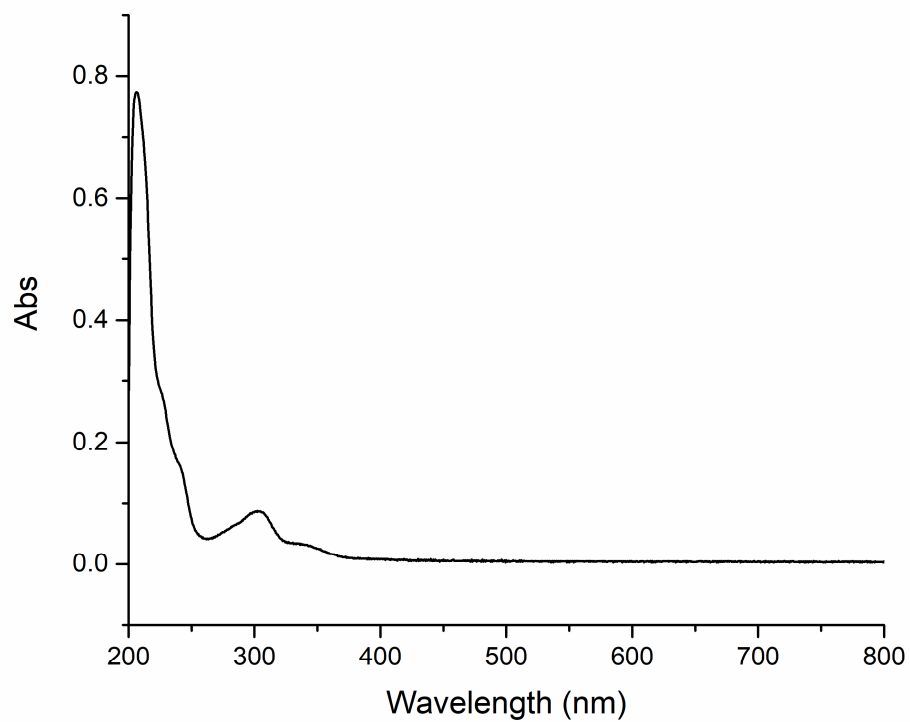

S48 IR spectrum of aspergorakhins E (5).

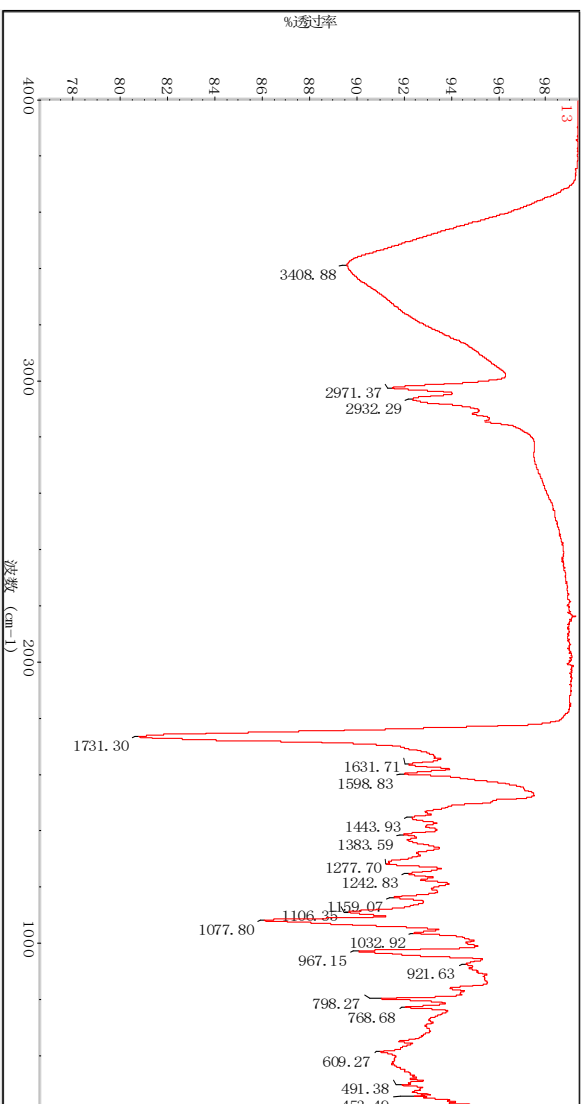

S49 <sup>1</sup>H NMR (600 MHz, CD<sub>3</sub>OD) spectrum of aspergorakhins F (6).

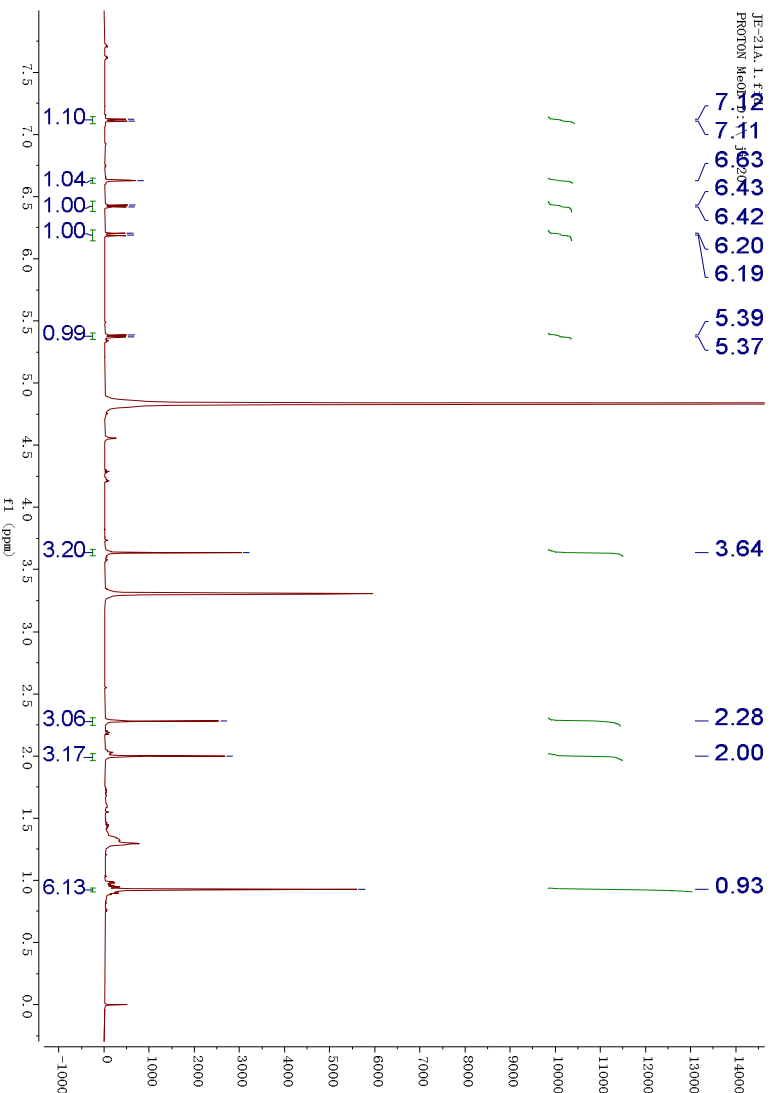

S50  $^{13}\text{C}$  NMR (150 MHz,  $\text{CD}_3\text{OD}$ ) spectrum of aspergorakhins F (6).

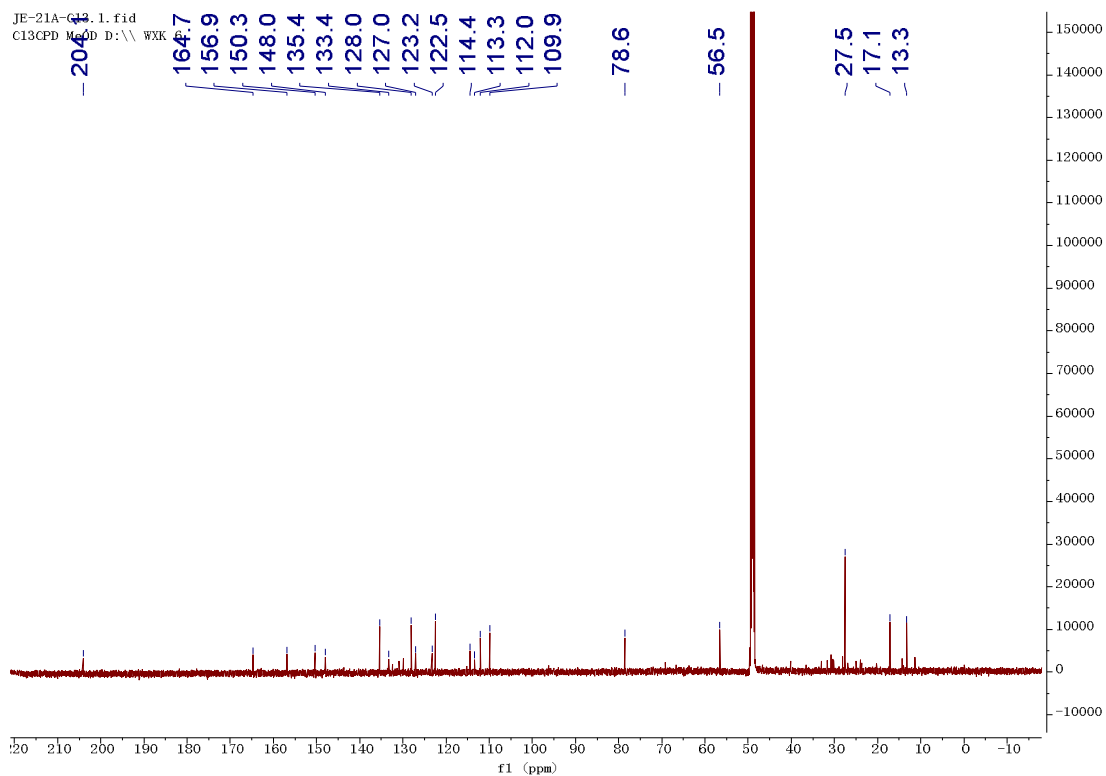

S51 HSQC spectrum of aspergorakhins F (6).

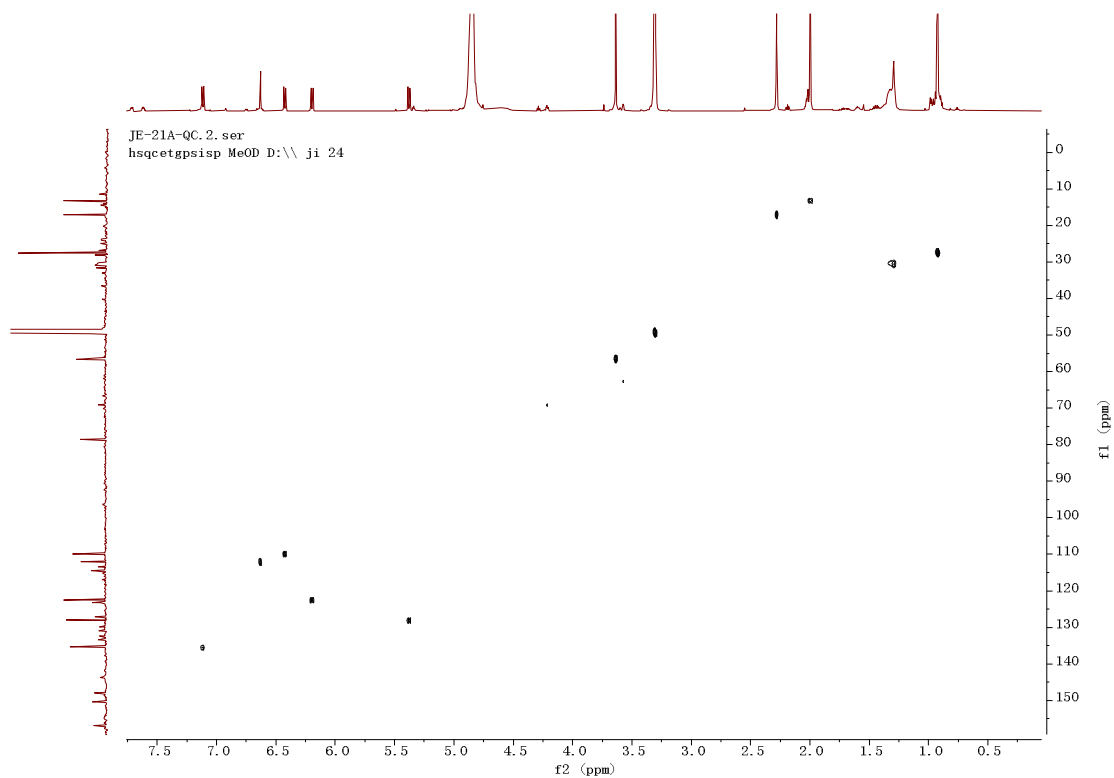

S52 COSY spectrum of aspergorakhins F (6).

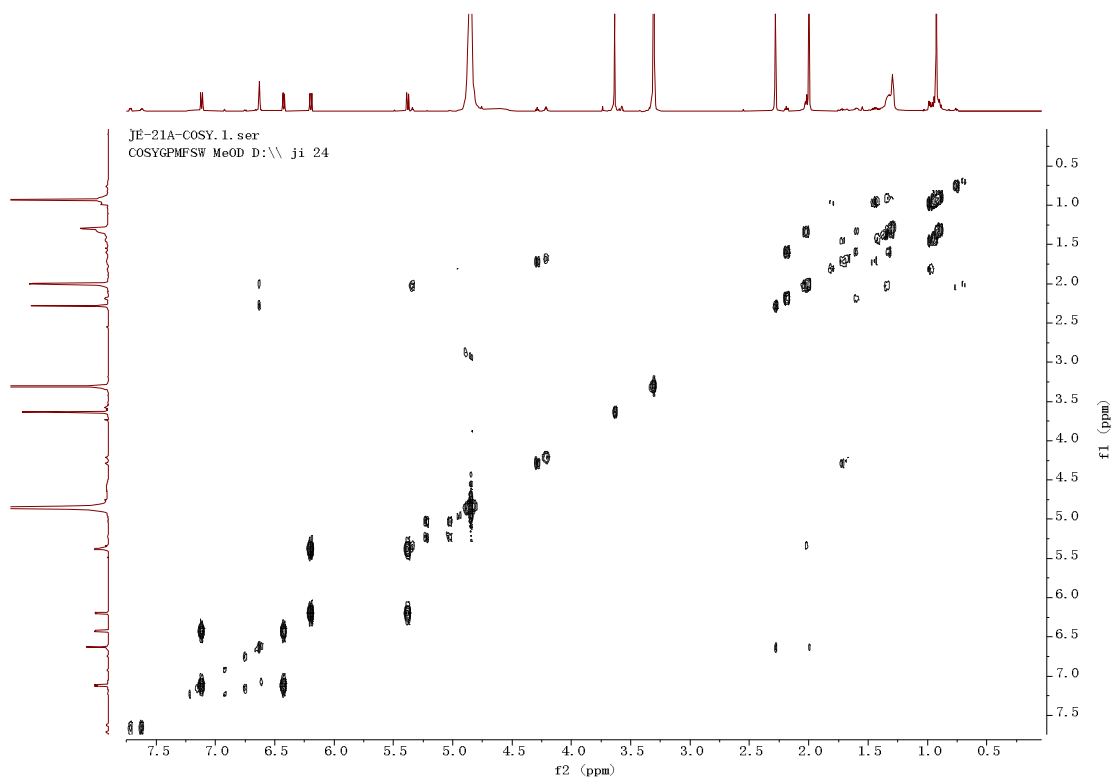

S53 HMBC spectrum of aspergorakhins F (6).

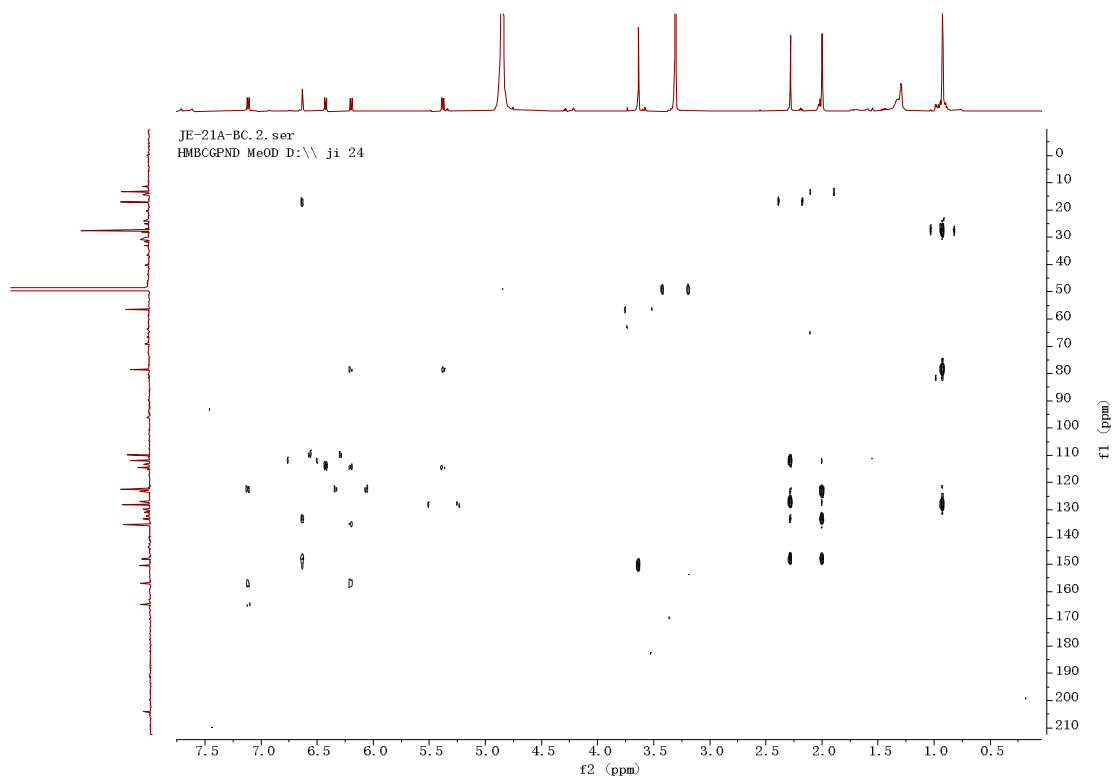



### S54 ESIMS spectrum of aspergorakhins F (6).

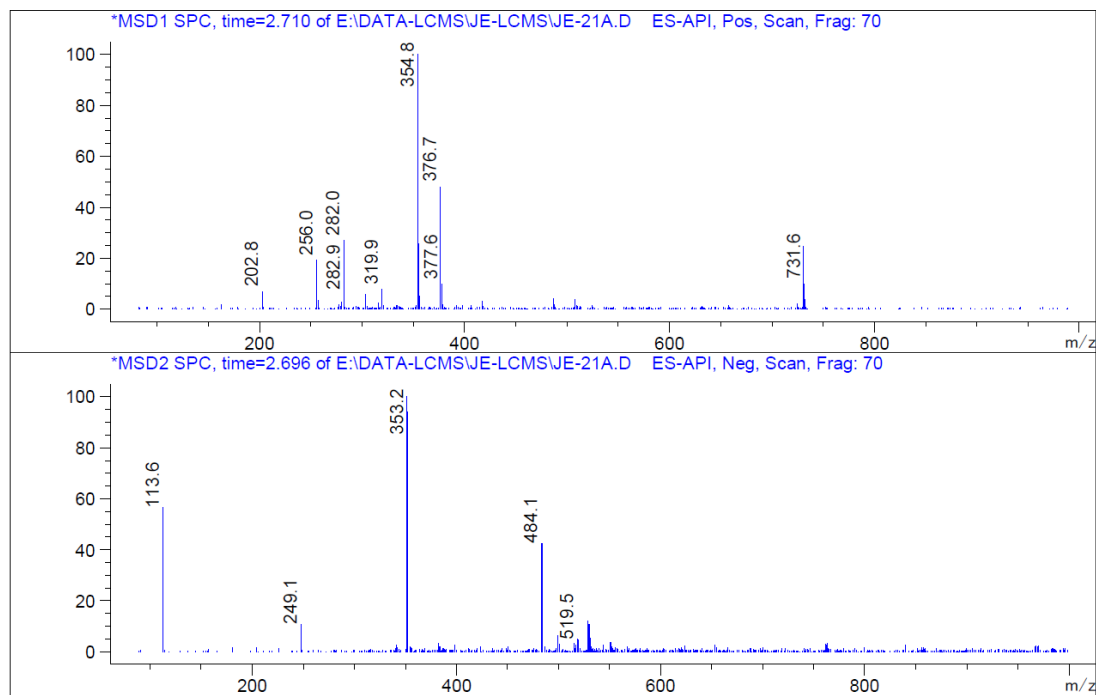

### S55 (+)-HRESIMS spectrum of aspergorakhins F (6).

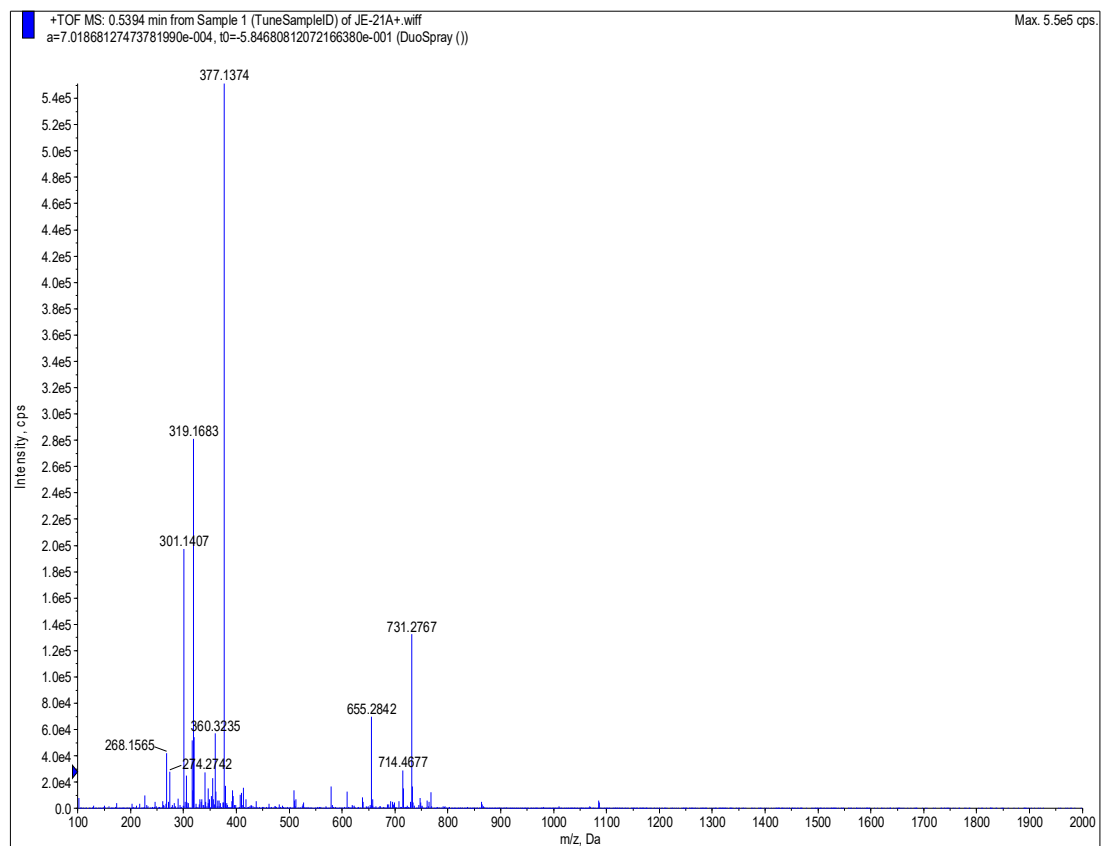

S56 UV spectrum of aspergorakhins F (6).

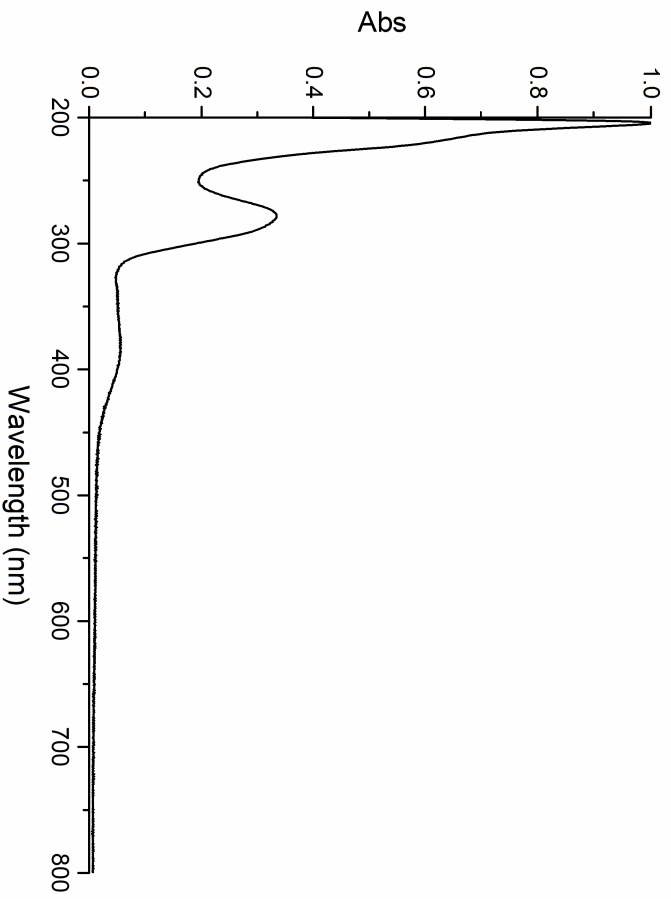

S57 IR spectrum of aspergorakhins F (6).

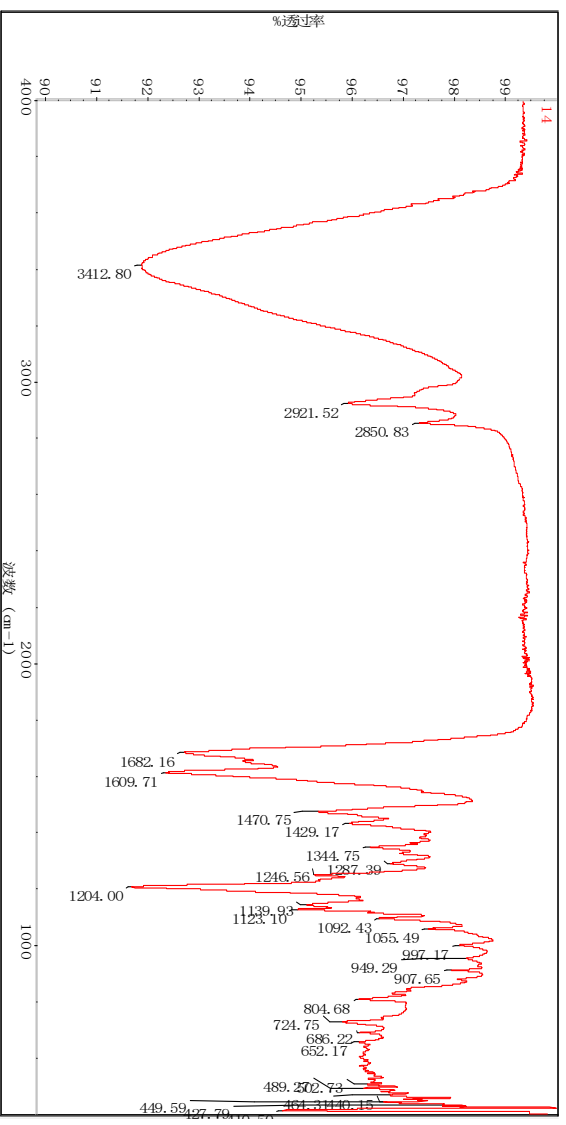

S58  $^1\text{H}$  NMR (600 MHz,  $\text{CD}_3\text{OD}$ ) spectrum of aspergorakhins G (7).

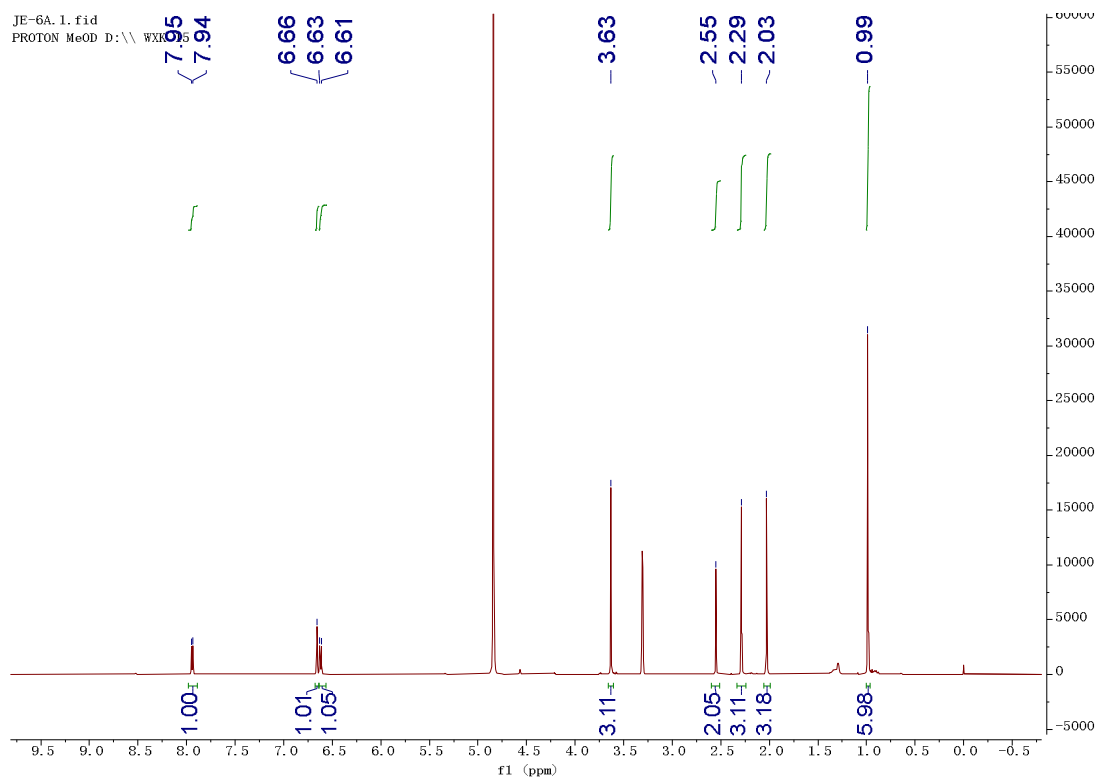

S59  $^{13}\text{C}$  NMR (150 MHz,  $\text{CD}_3\text{OD}$ ) spectrum of aspergorakhins G (7).

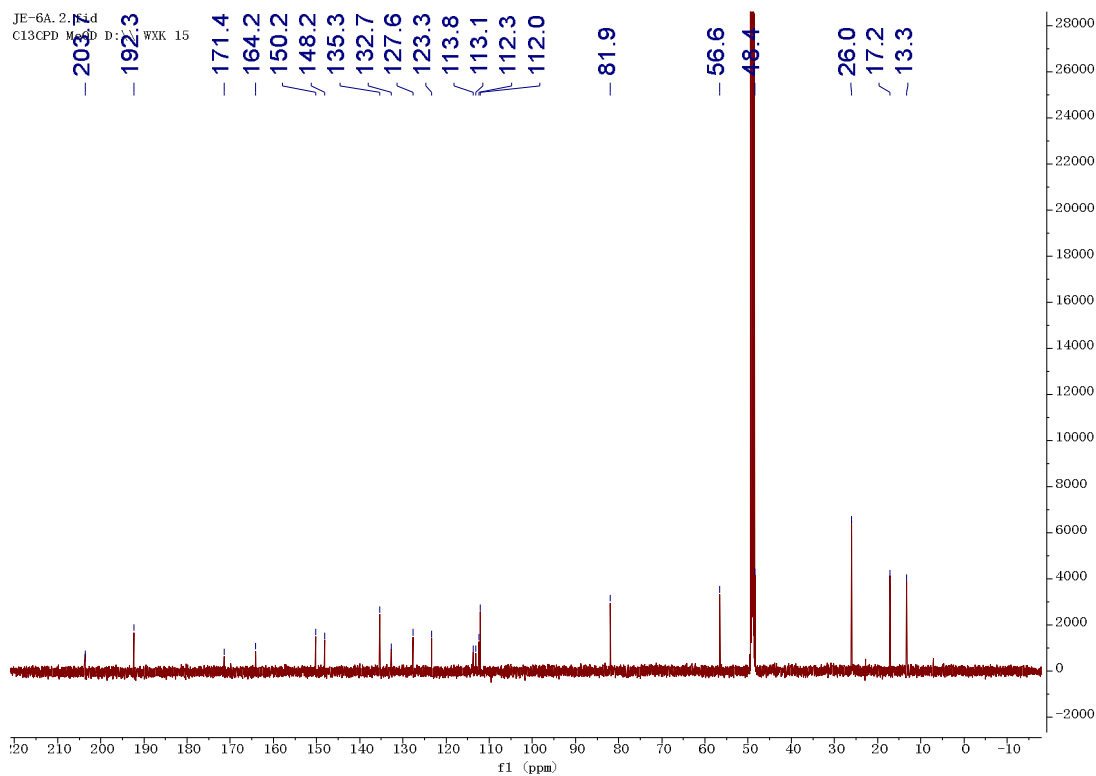

S60 HSQC spectrum of aspergorakhins G (7).

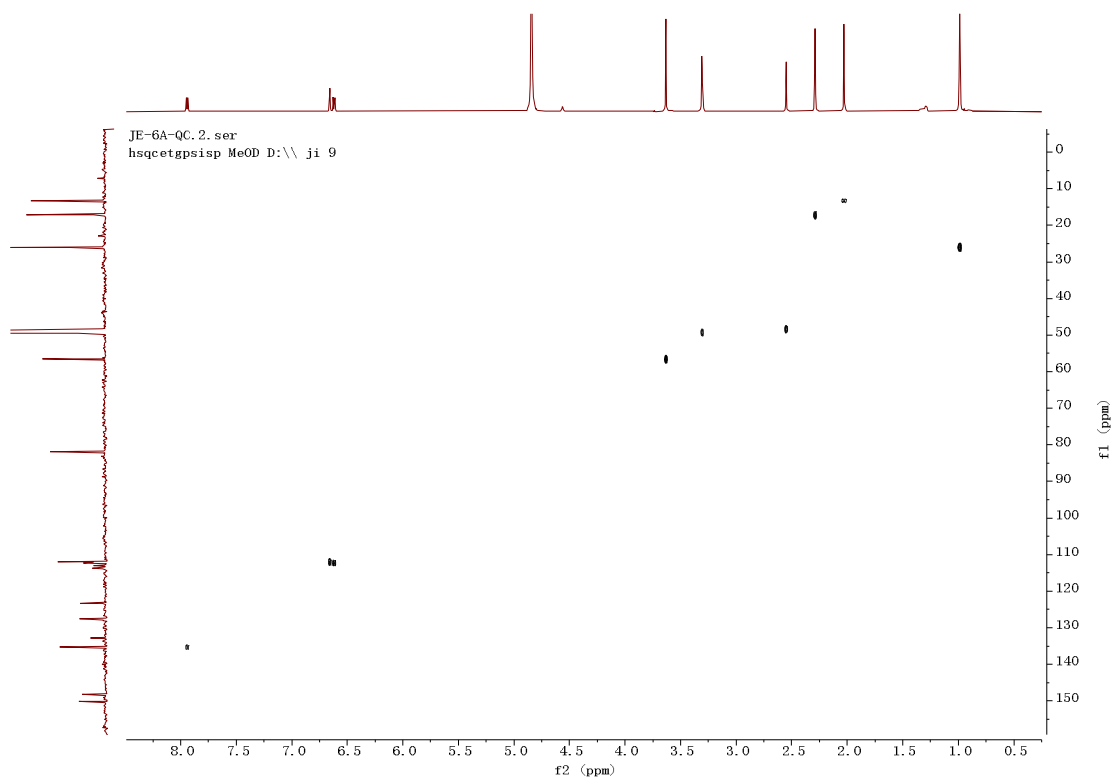

S61 COSY spectrum of aspergorakhins G (7).

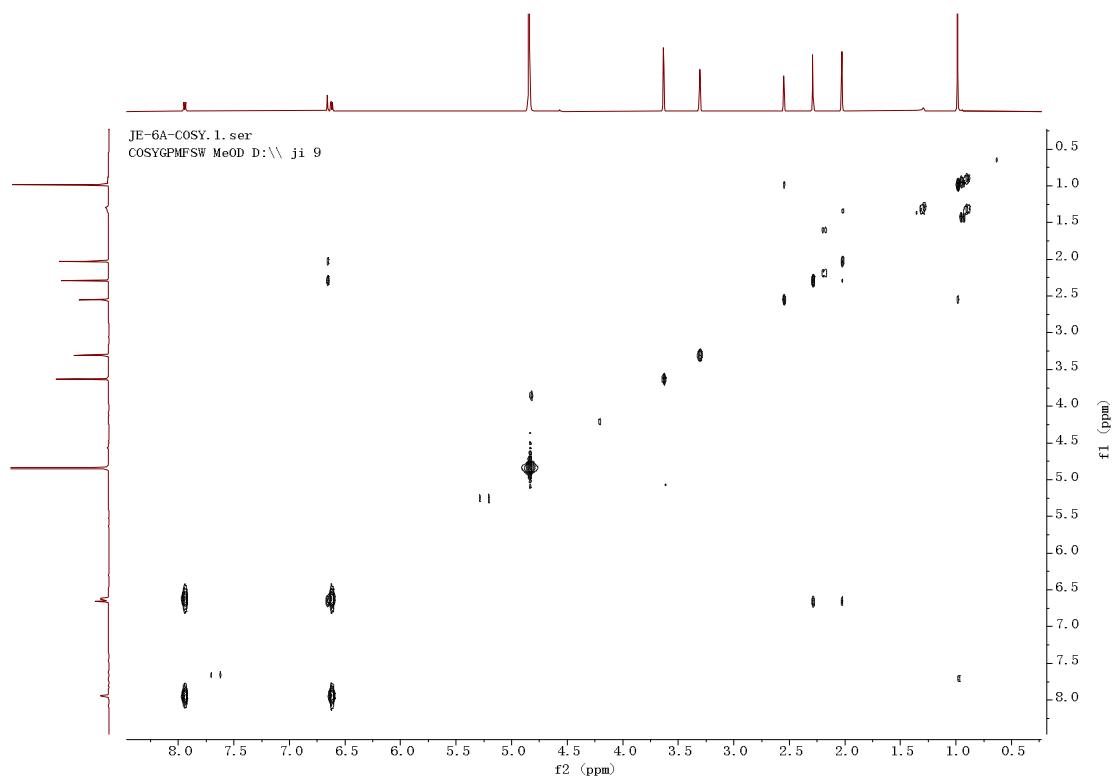

S62 HMBC spectrum of aspergorakhins G (7).

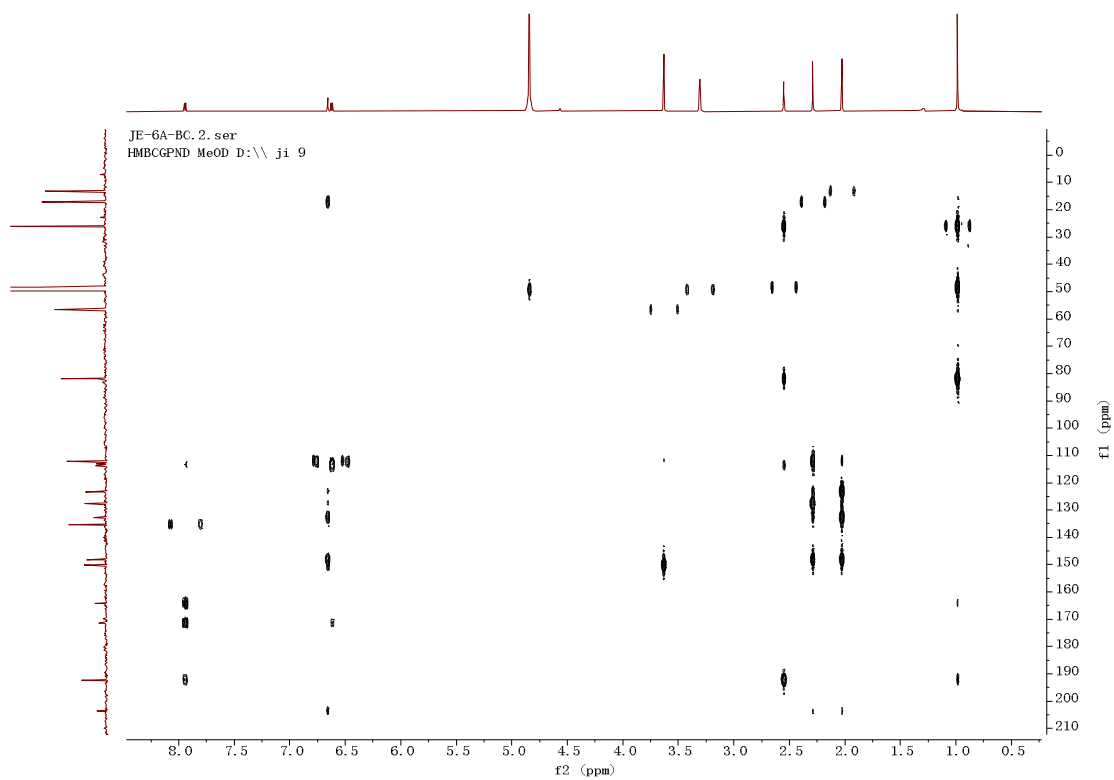

S63 ESIMS spectrum of aspergorakhins G (7).

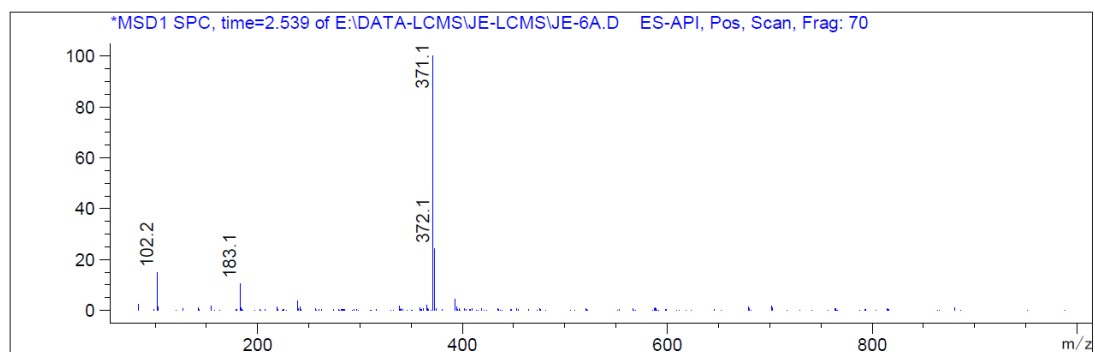

### S64 (+)-HRESIMS spectrum of aspergorakhins G (7).

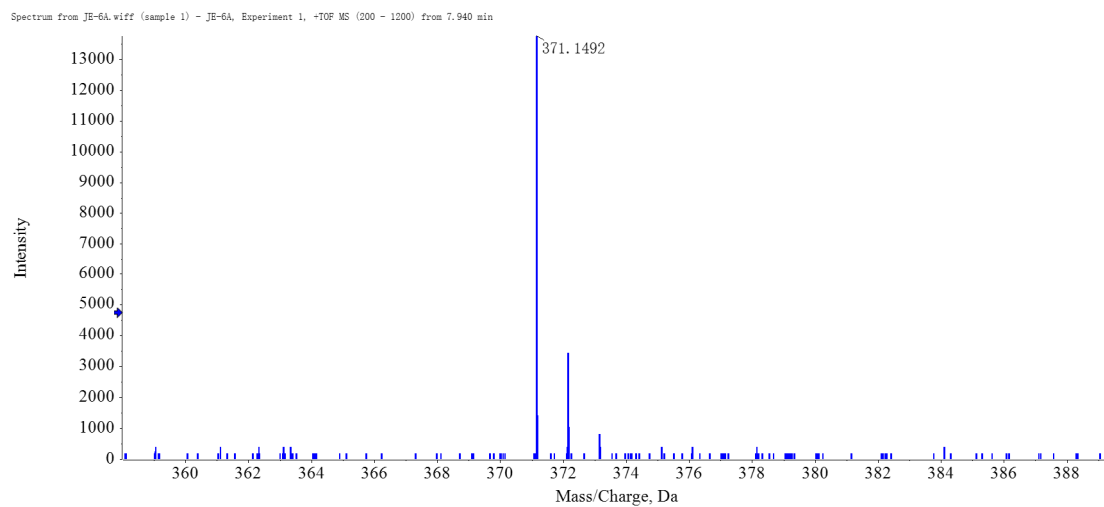

### S65 UV spectrum of aspergorakhins G (7).

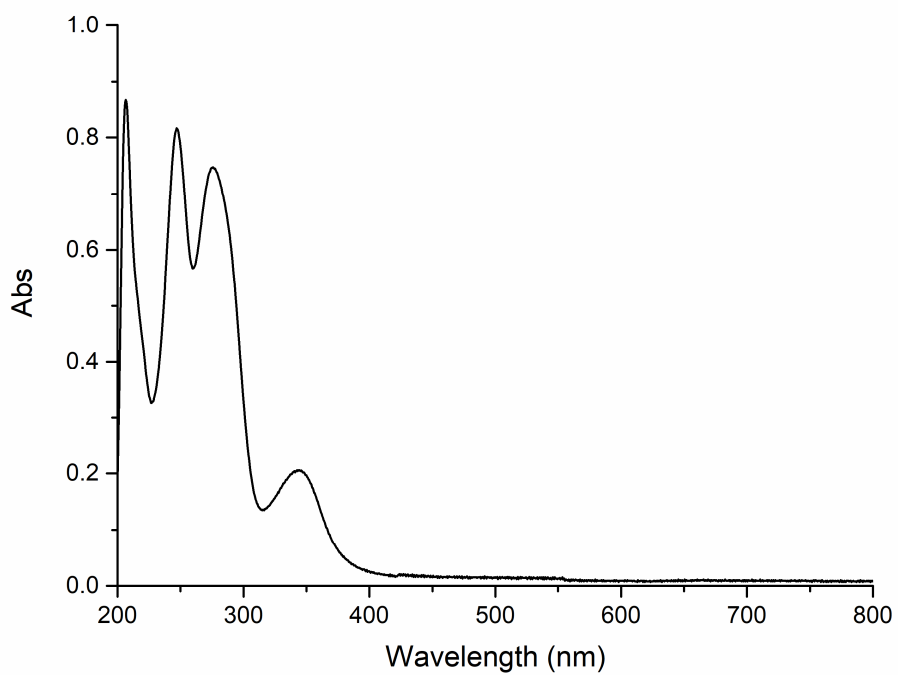

S66 IR spectrum of aspergorakhins G (7).

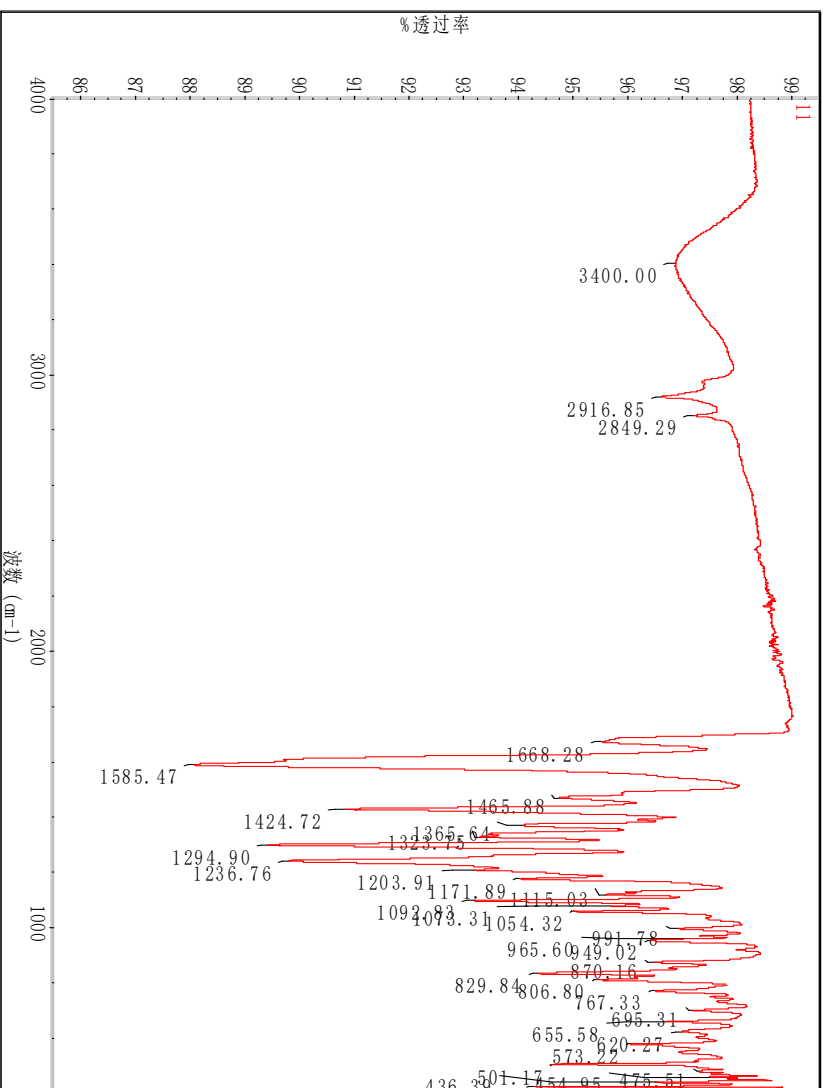

S67 <sup>1</sup>H NMR (600 MHz, CD<sub>3</sub>OD) spectrum of aspergorakhins H (8).

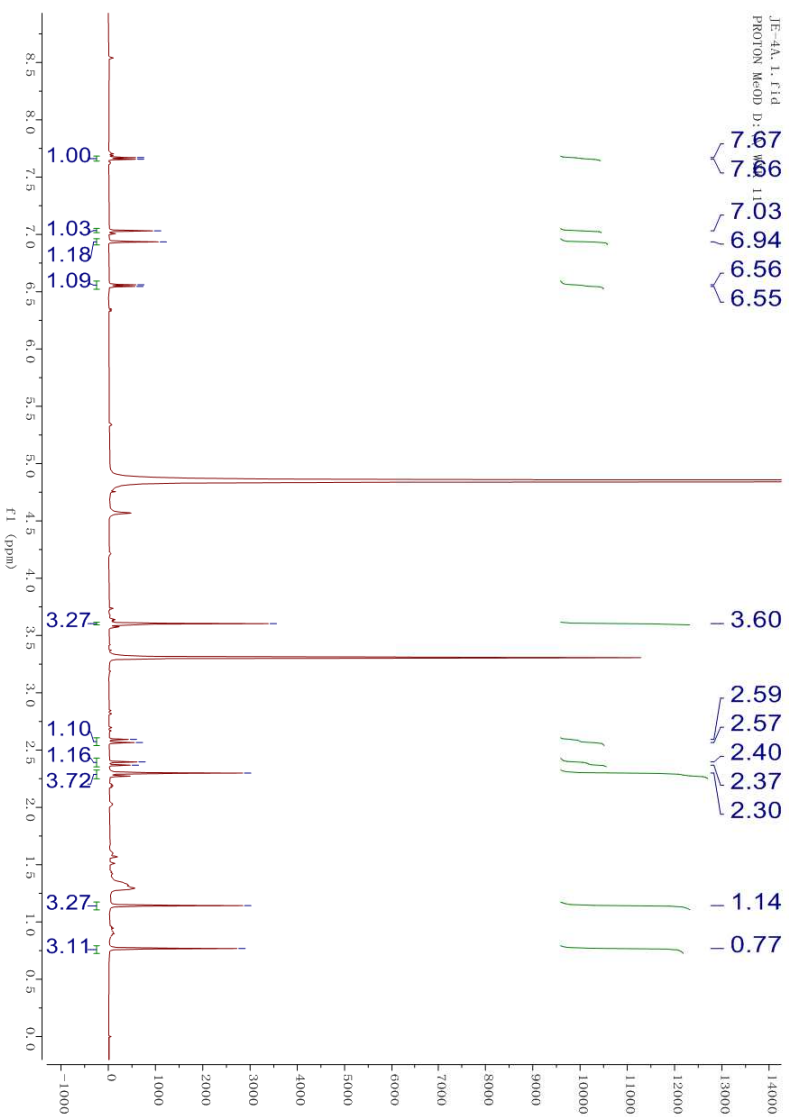

S68  $^{13}\text{C}$  NMR (150 MHz,  $\text{CD}_3\text{OD}$ ) spectrum of aspergorakhins H (**8**).

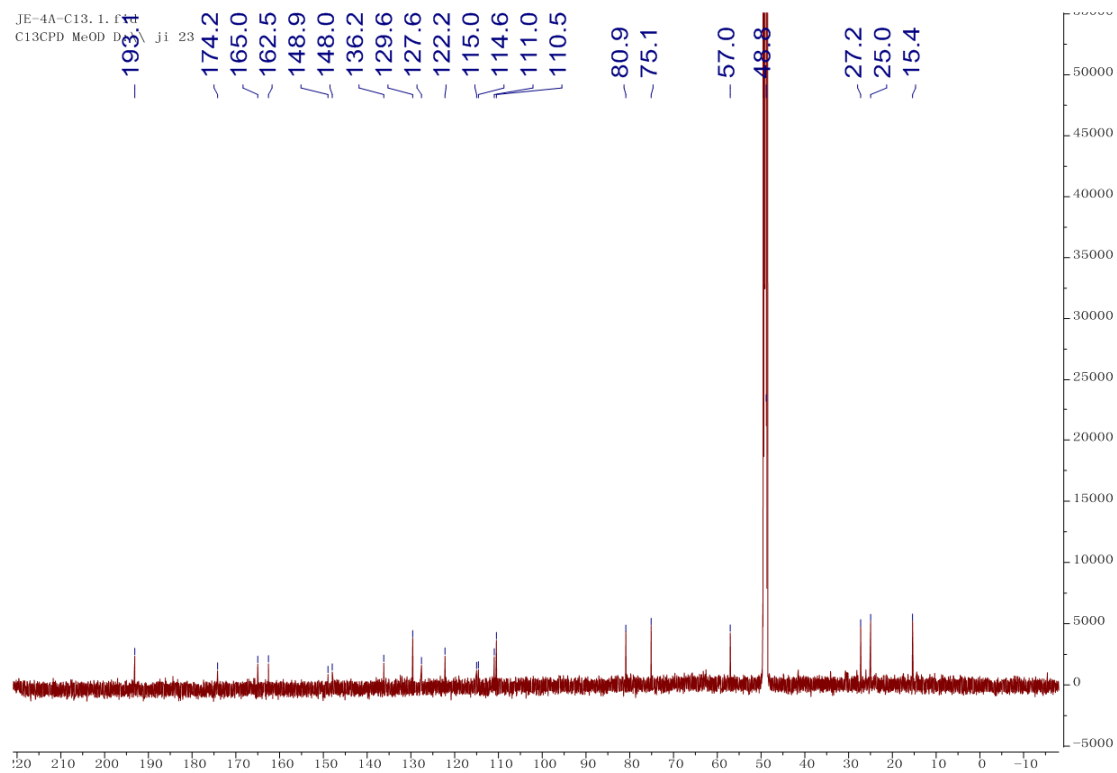

S69 HSQC spectrum of aspergorakhins H (**8**).

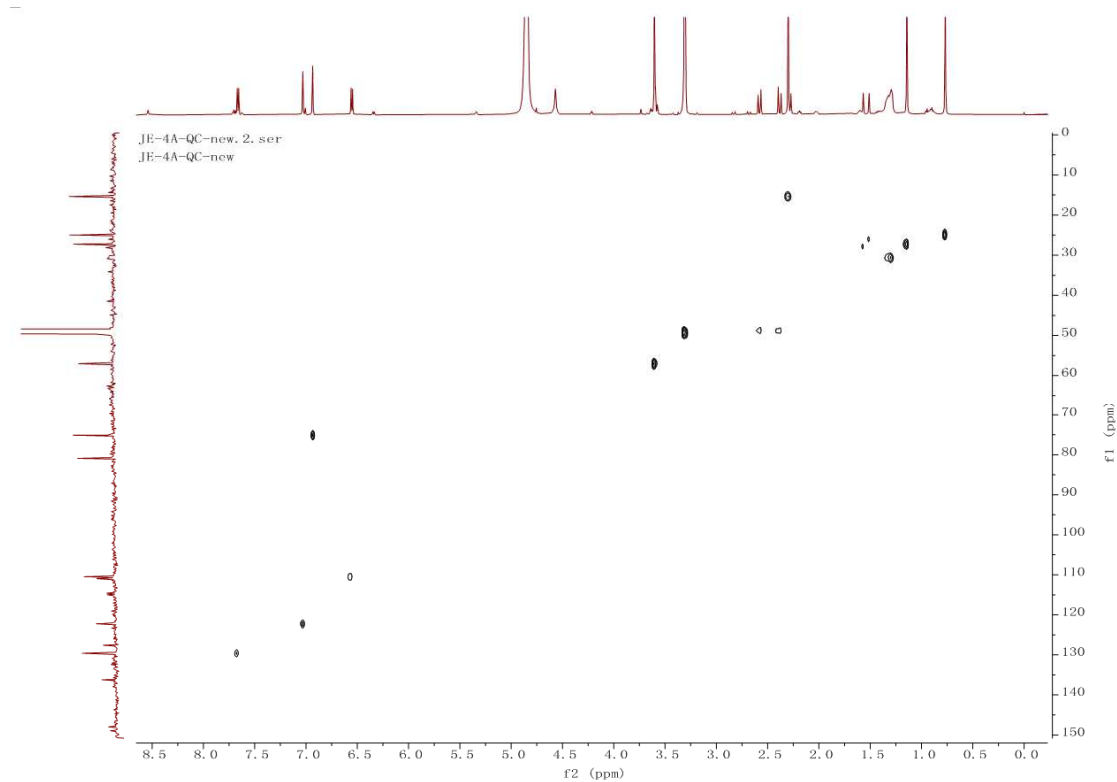



S70 COSY spectrum of aspergorakhins H (8).

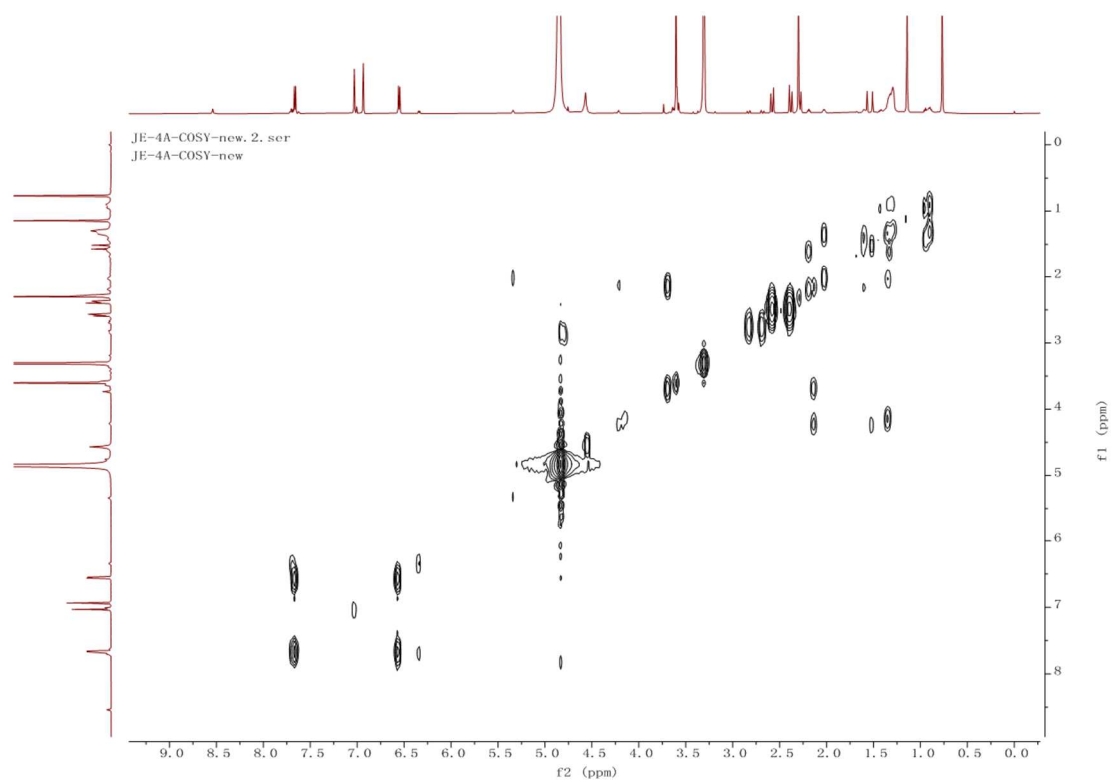

S71 HMBC spectrum of aspergorakhins H (8).

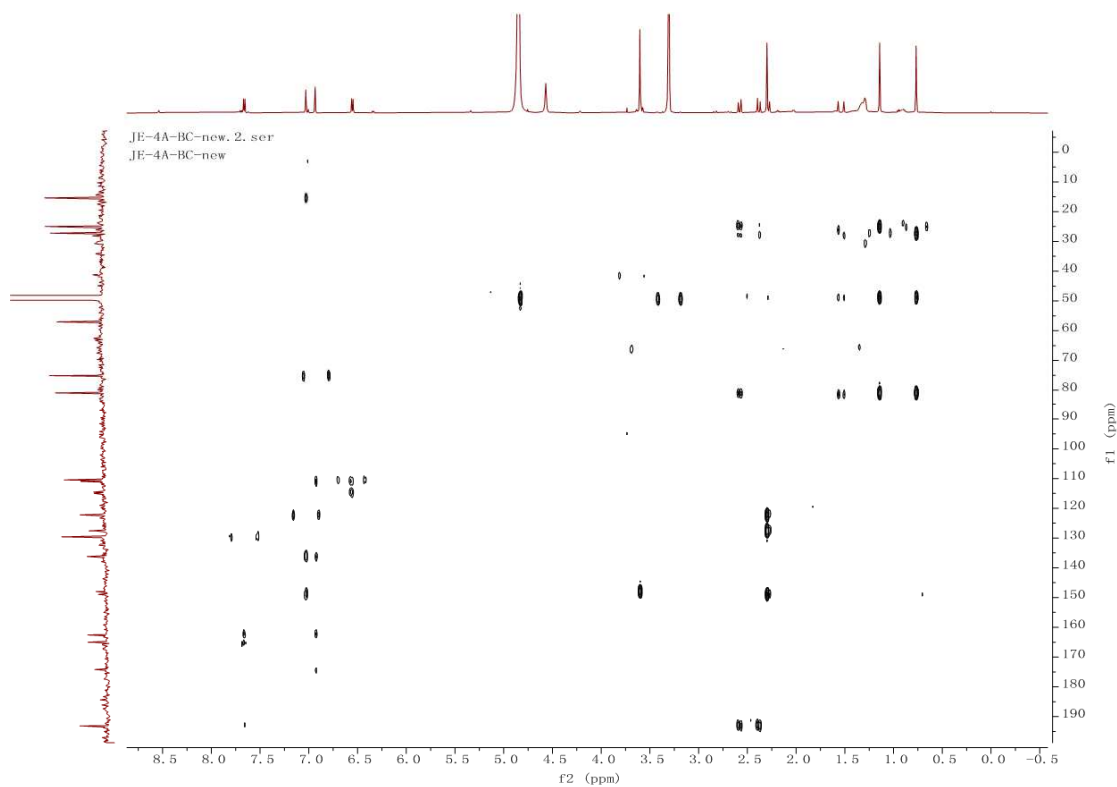

S72 NOESY spectrum of aspergorakhins H (8).

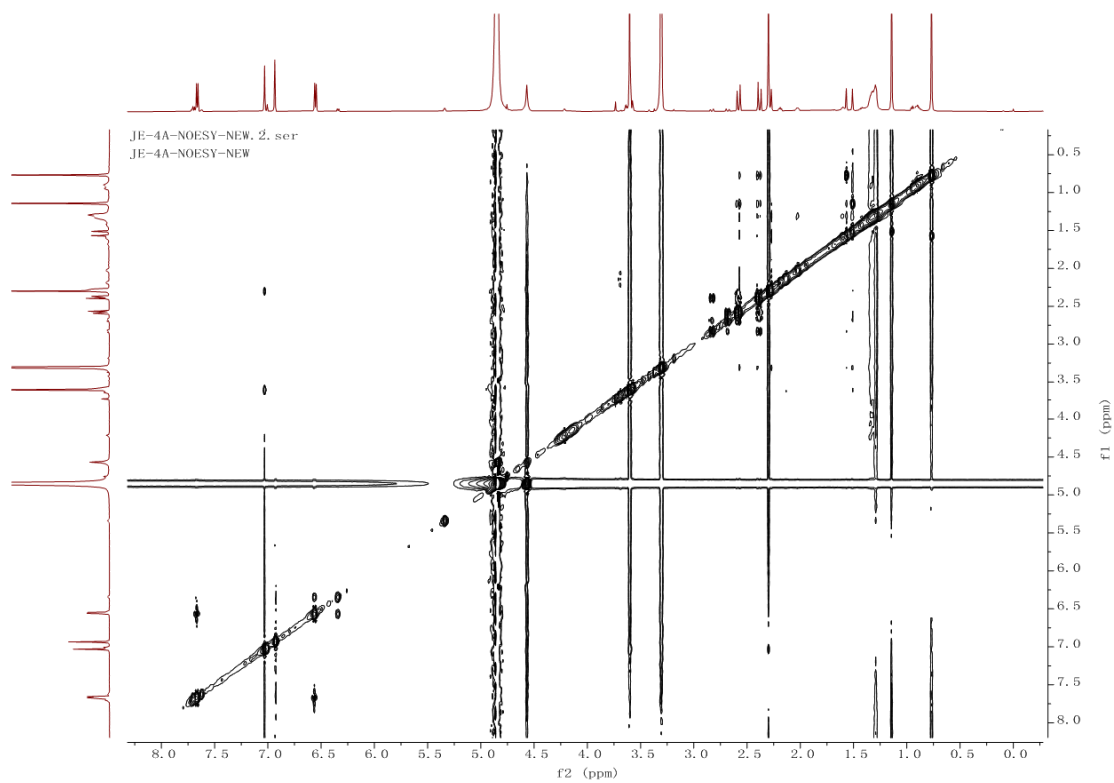

S73 ESIMS spectrum of aspergorakhins H (8).

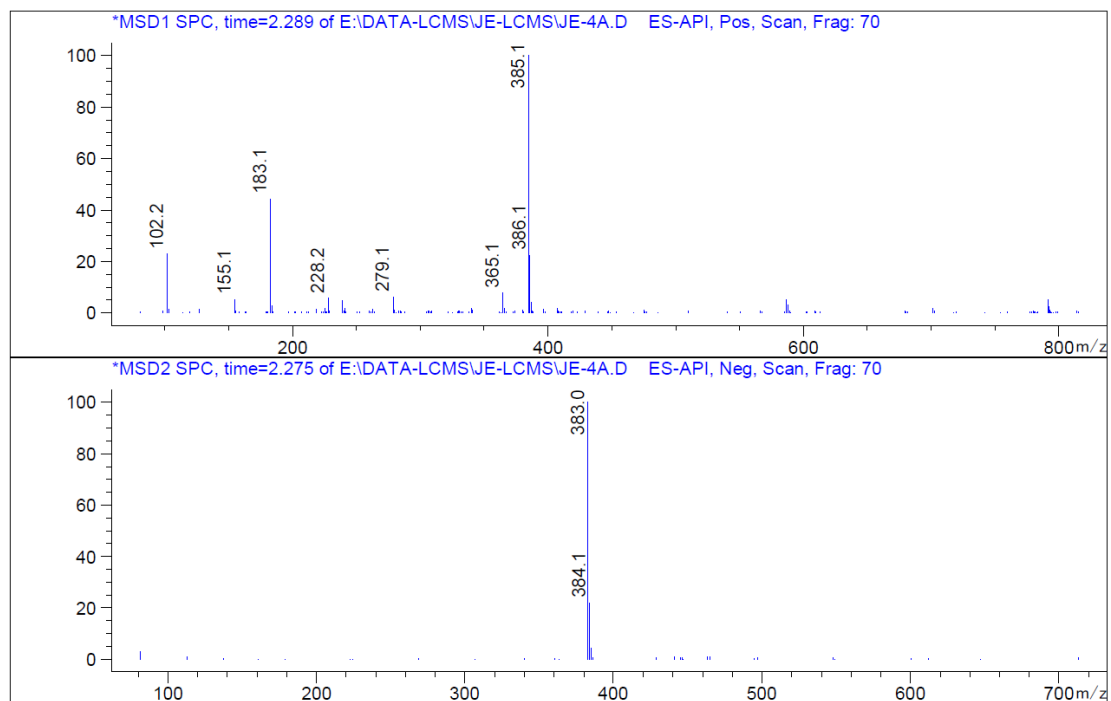

**S74 (+)-HRESIMS spectrum of aspergorakhins H (8).**

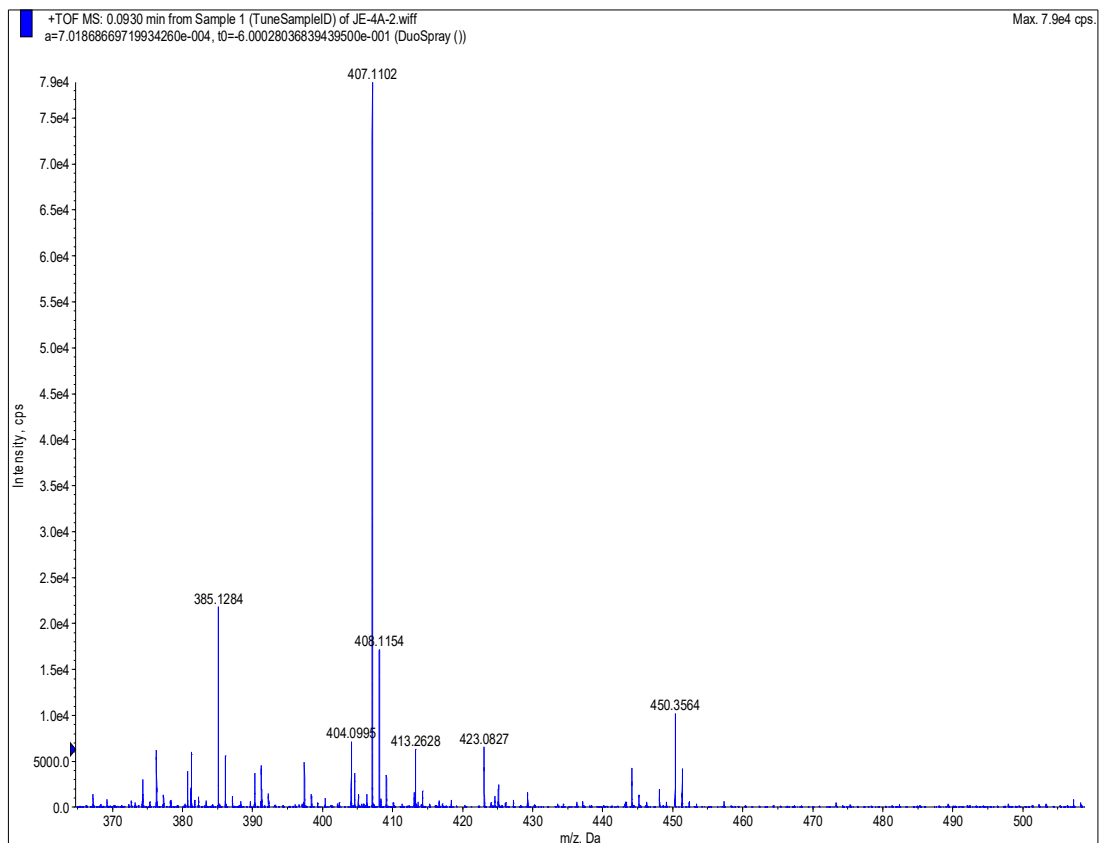

**S75 UV spectrum of aspergorakhins H (8).**

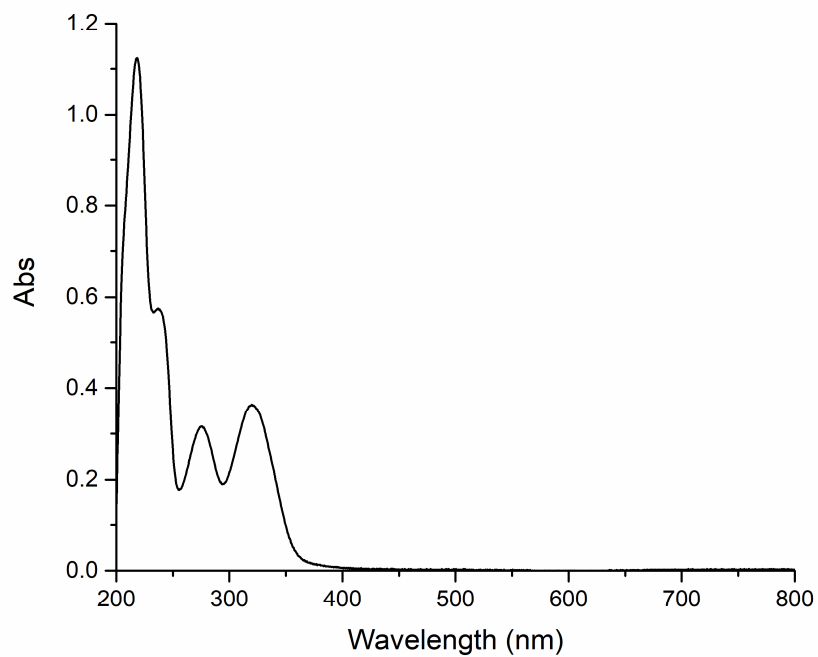

S76 IR spectrum of aspergorakhins H (8).

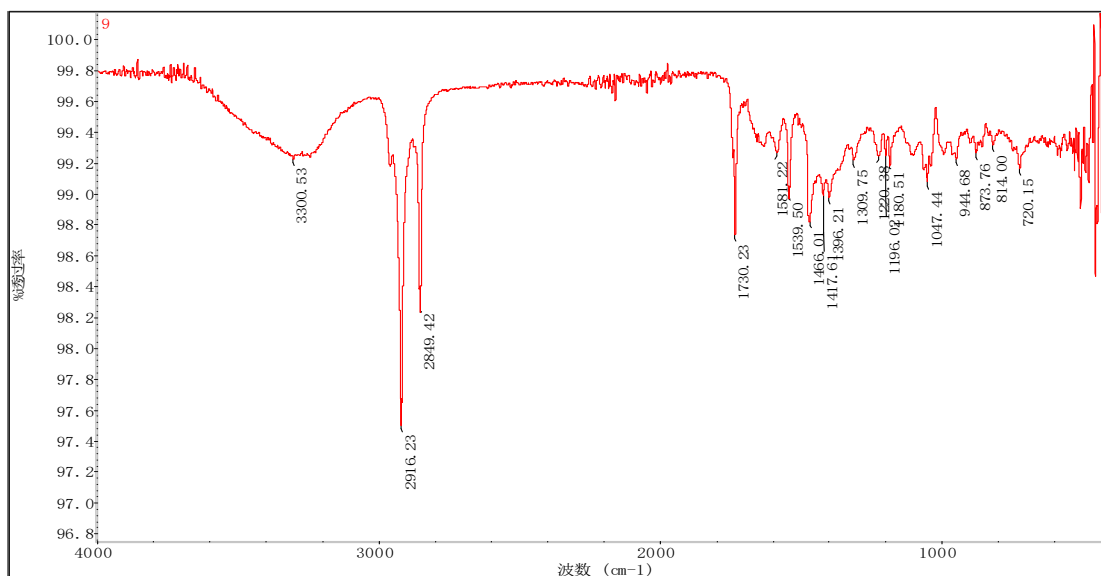

S77 <sup>1</sup>H NMR (600 MHz, CD<sub>3</sub>OD) spectrum of aspergorakhins I (9).

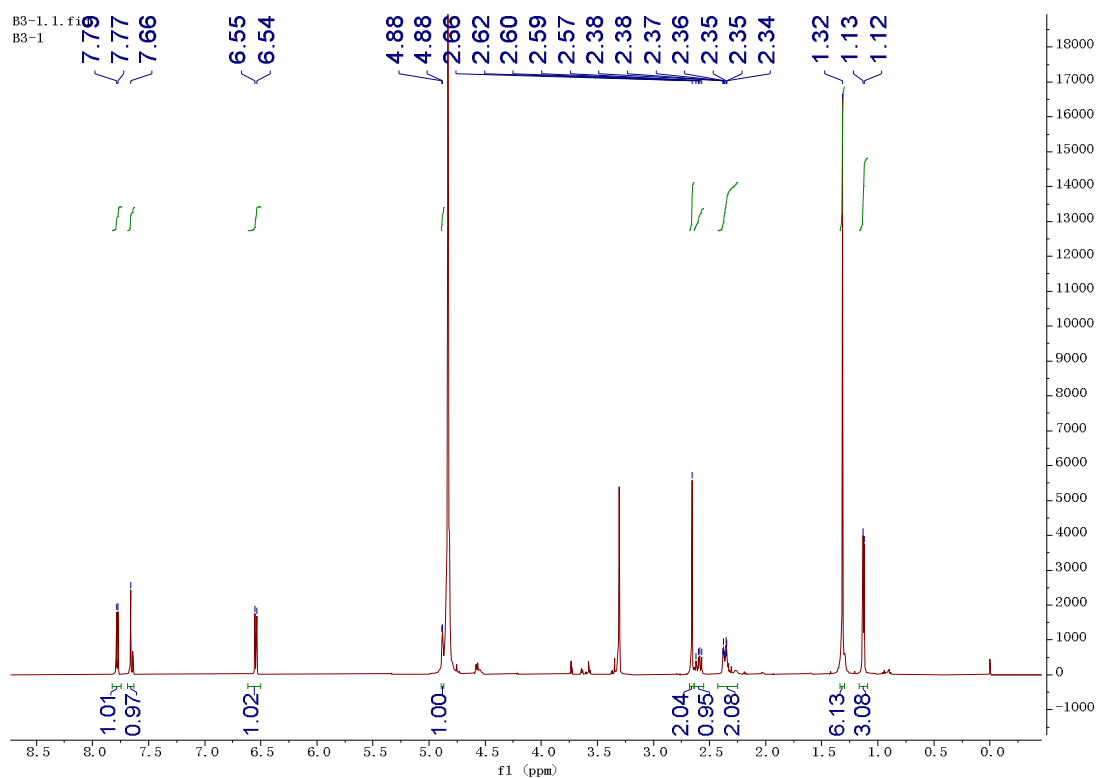

S78  $^{13}\text{C}$  NMR (150 MHz,  $\text{CD}_3\text{OD}$ ) spectrum of aspergorakhins I (9).

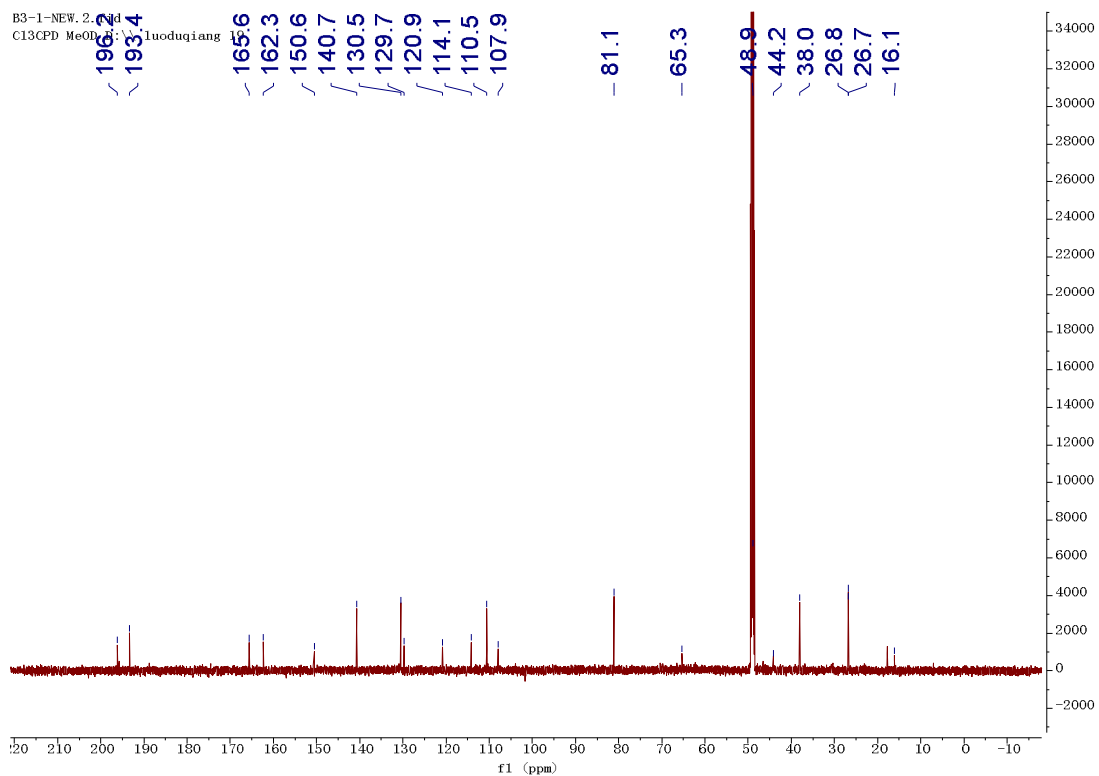

S79 HSQC spectrum of aspergorakhins I (9).

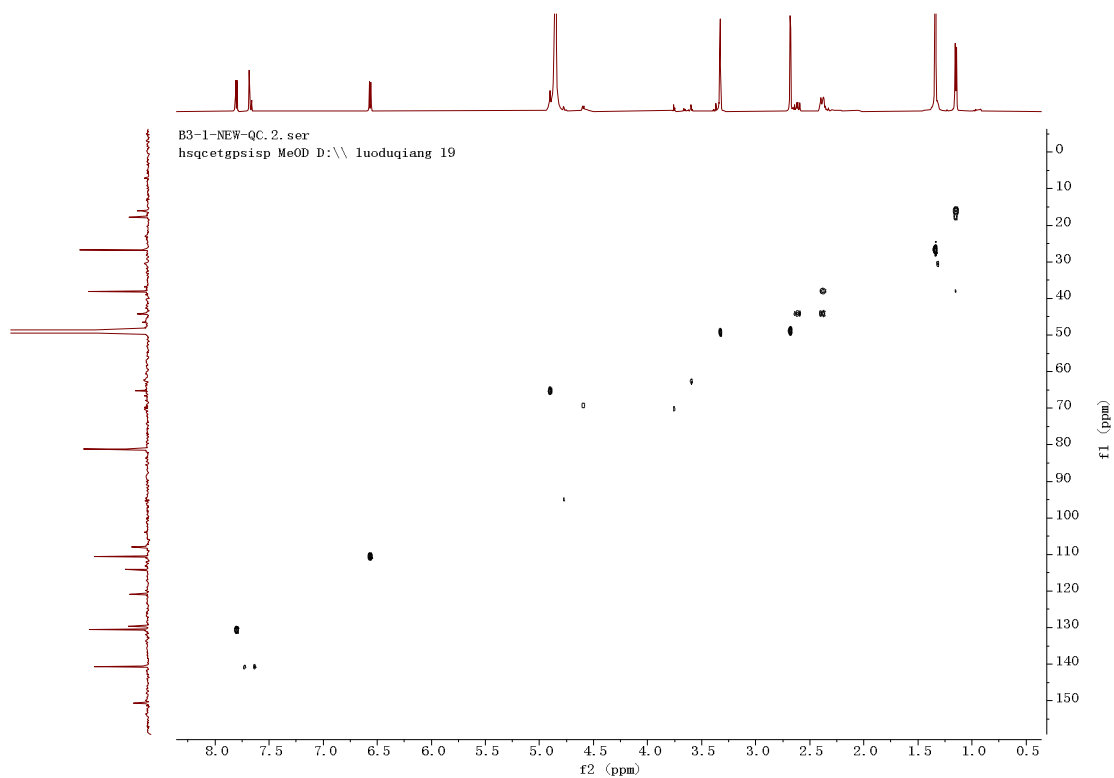

S80 COSY spectrum of aspergorakhins I (9).

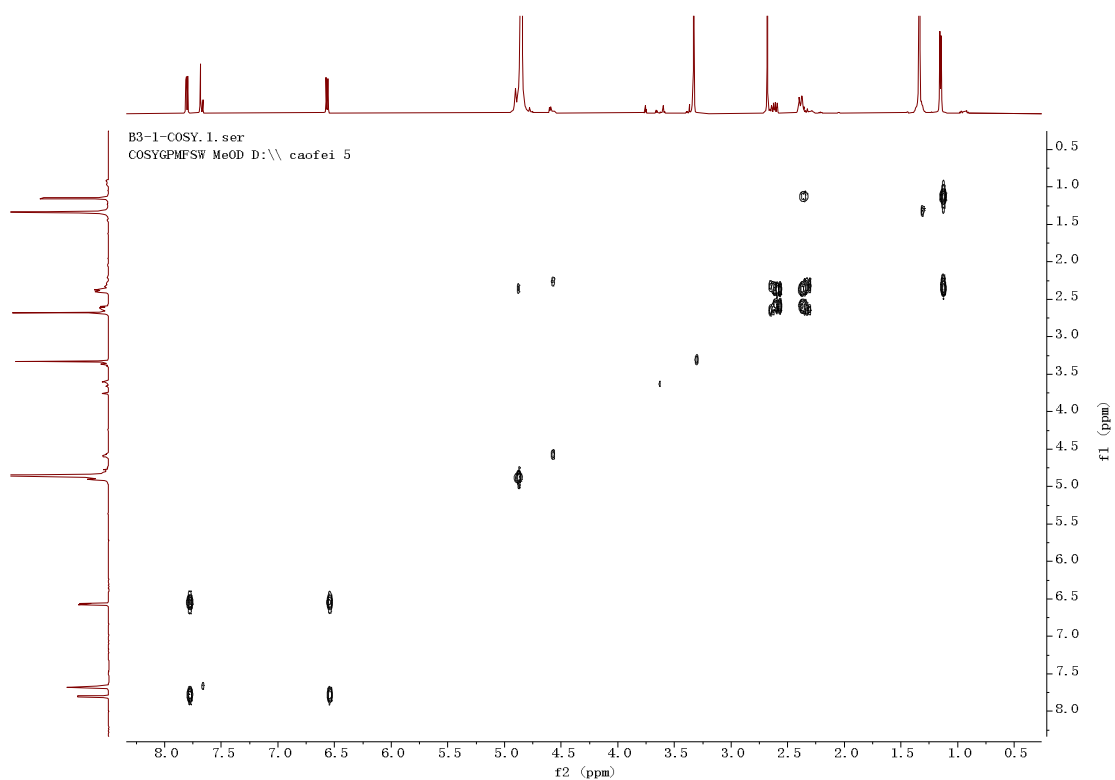

S81 HMBC spectrum of aspergorakhins I (9).

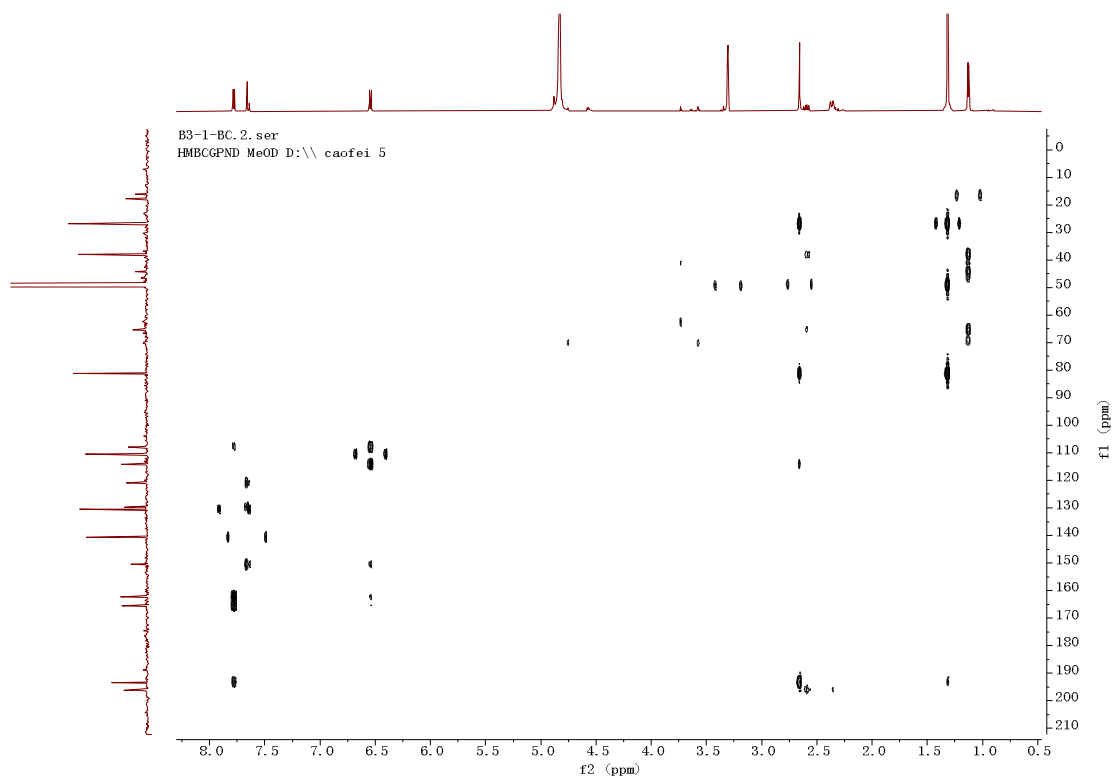

S82 NOESY spectrum of aspergorakhins I (9).

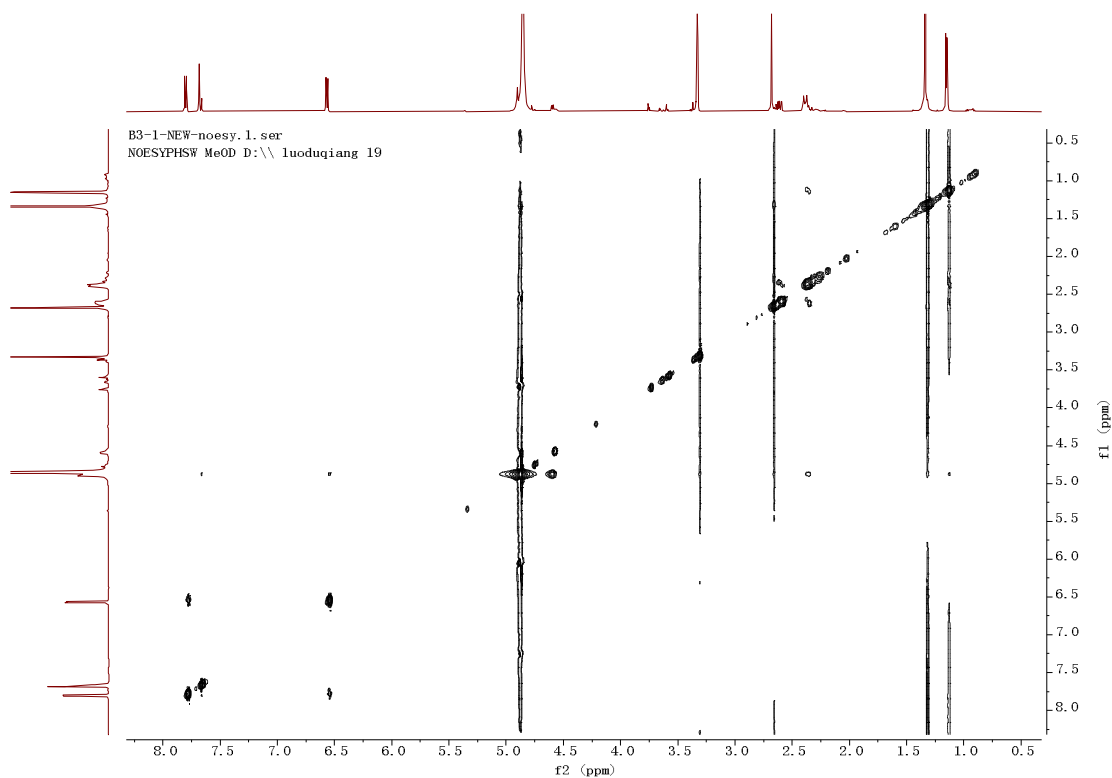

S83 ESIMS spectrum of aspergorakhins I (9).

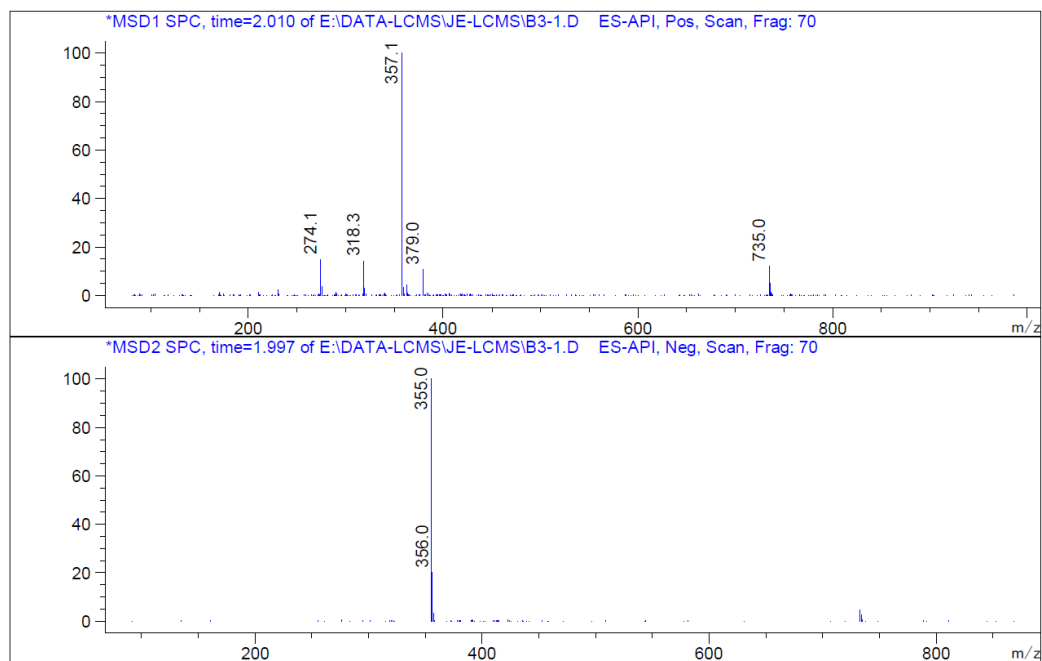

### S84 (+)-HRESIMS spectrum of aspergorakhins I (9).

Spectrum from B3-1.wiff (sample 1) - B3-1, Experiment 1, +TOF MS (200 - 1200) from 5.371 min

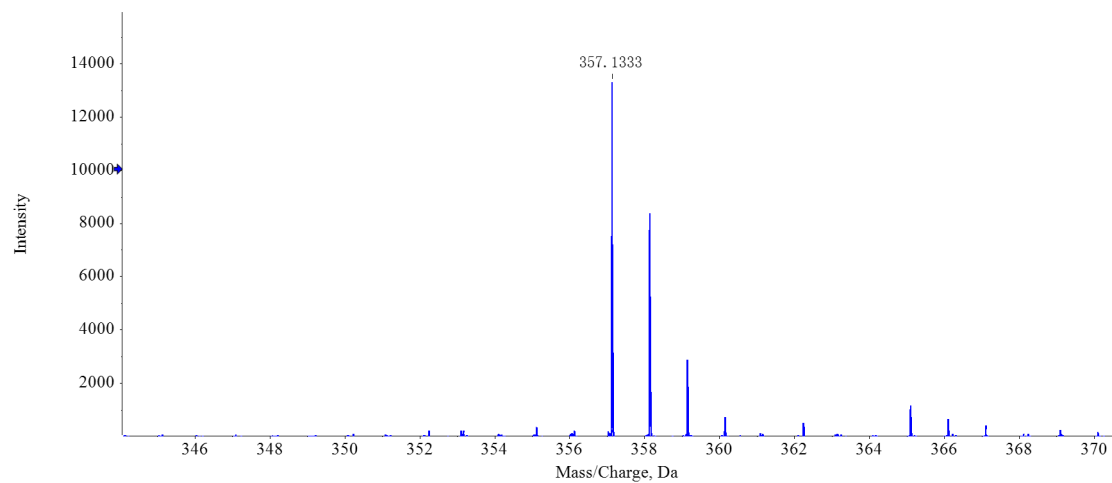

### S85 UV spectrum of aspergorakhins I (9).

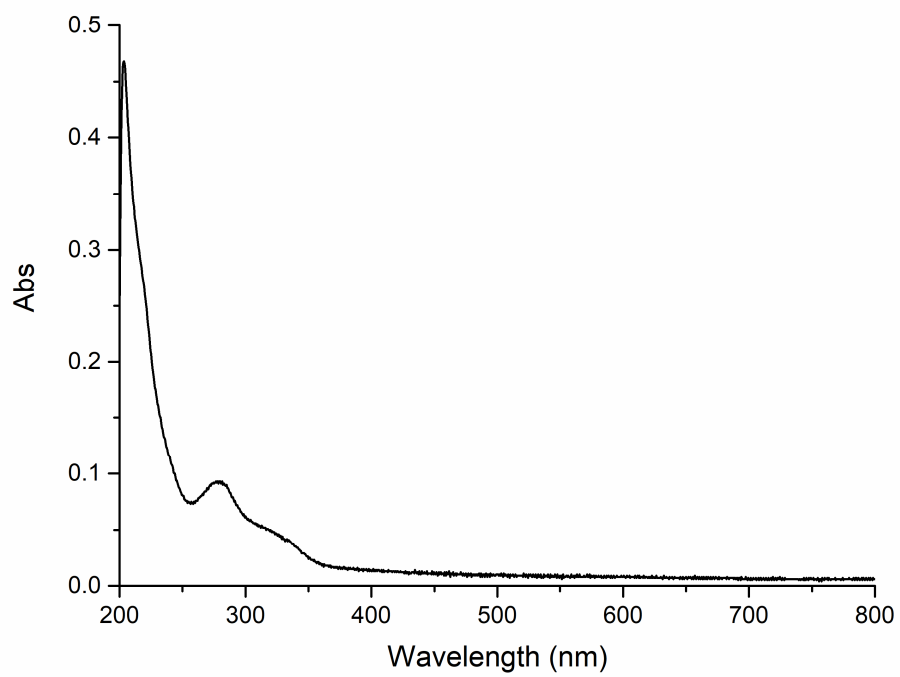



S86 IR spectrum of aspergorakhins I (9).

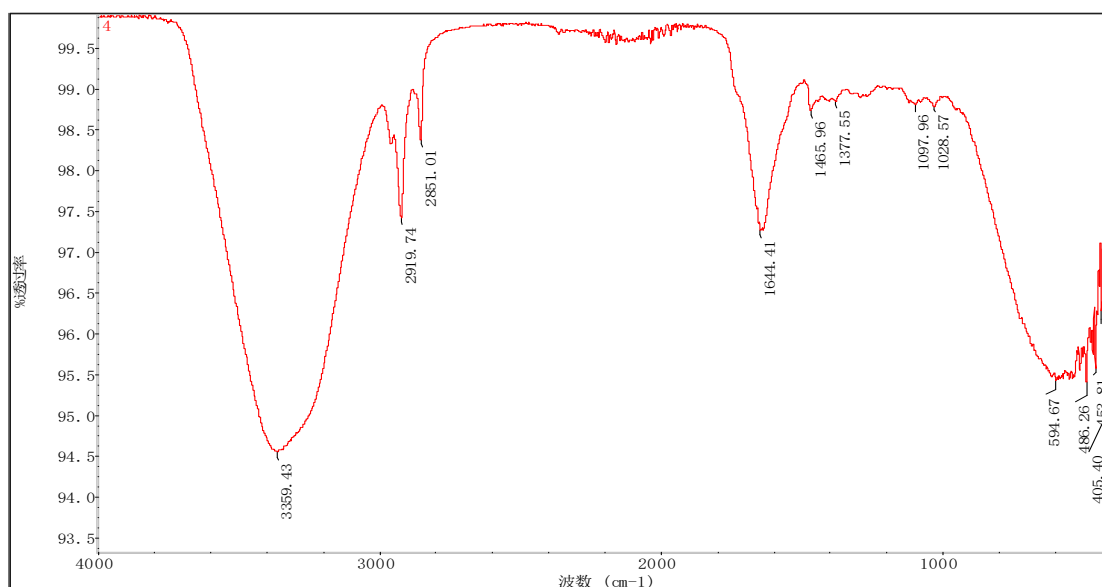

S87 <sup>1</sup>H NMR (600 MHz, CD<sub>3</sub>OD) spectrum of aspergorakhins J (10).

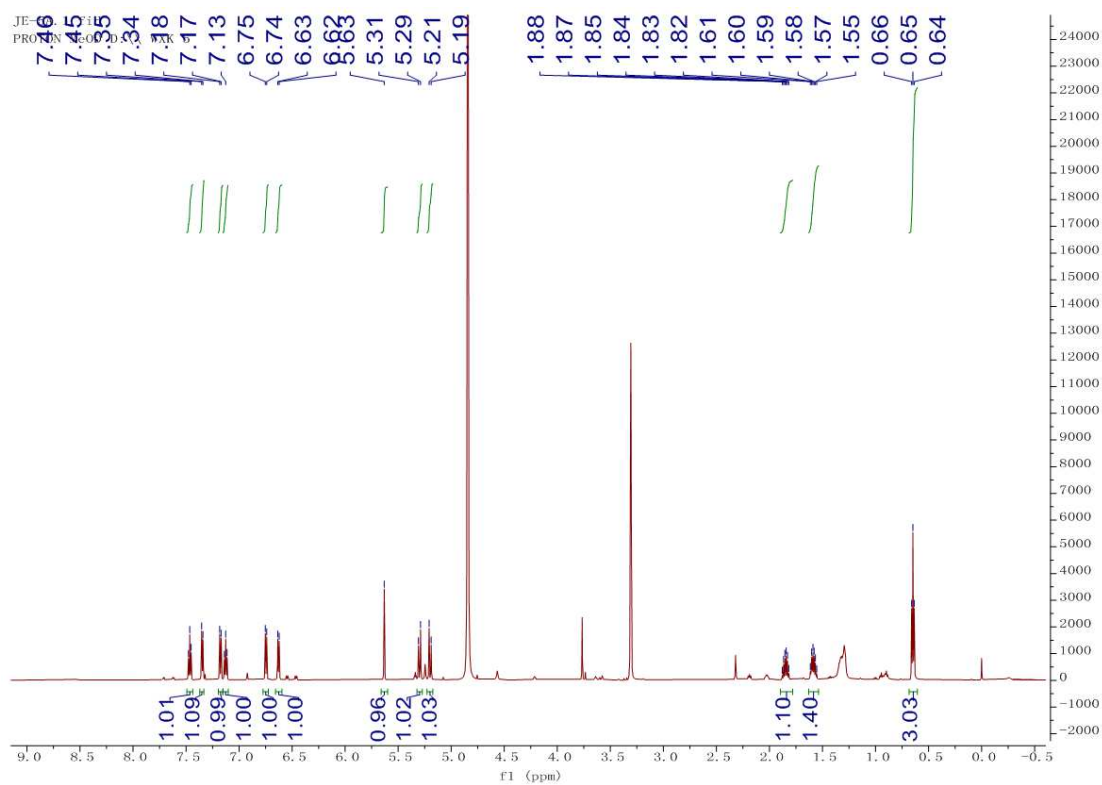

**S88**  $^{13}\text{C}$  NMR (150 MHz,  $\text{CD}_3\text{OD}$ ) spectrum of aspergorakhins J (**10**).

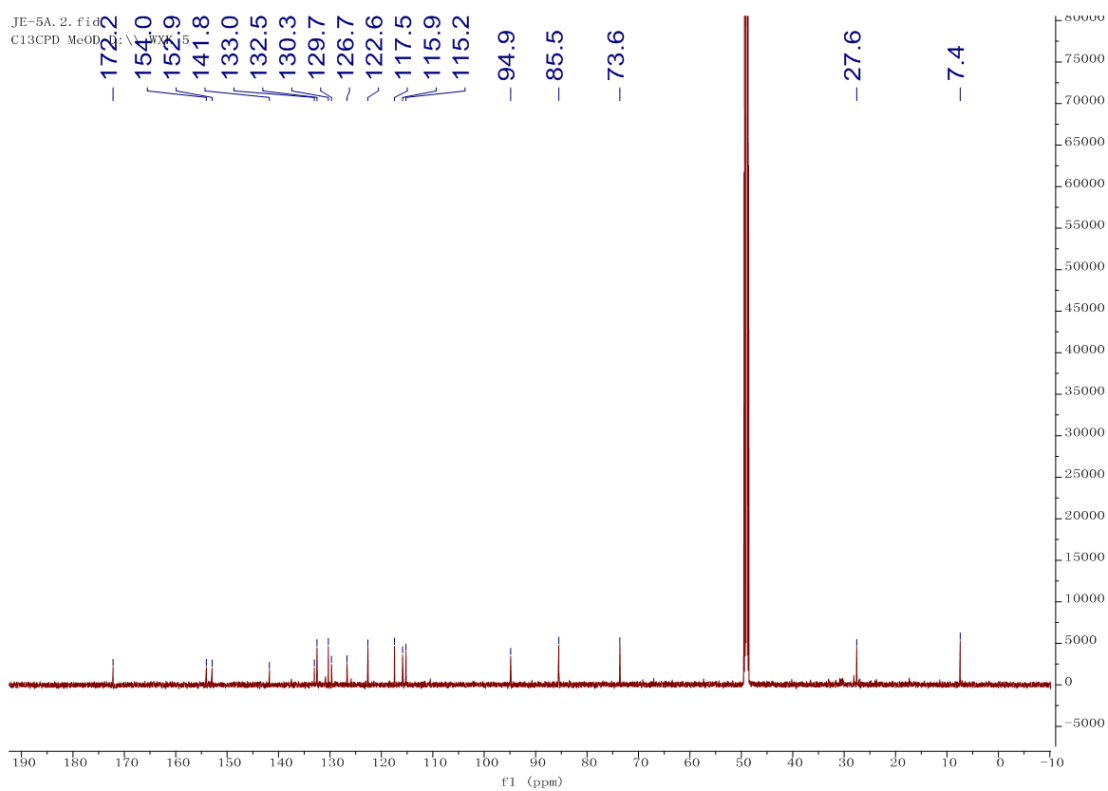

**S89** HSQC spectrum of aspergorakhins J (**10**).

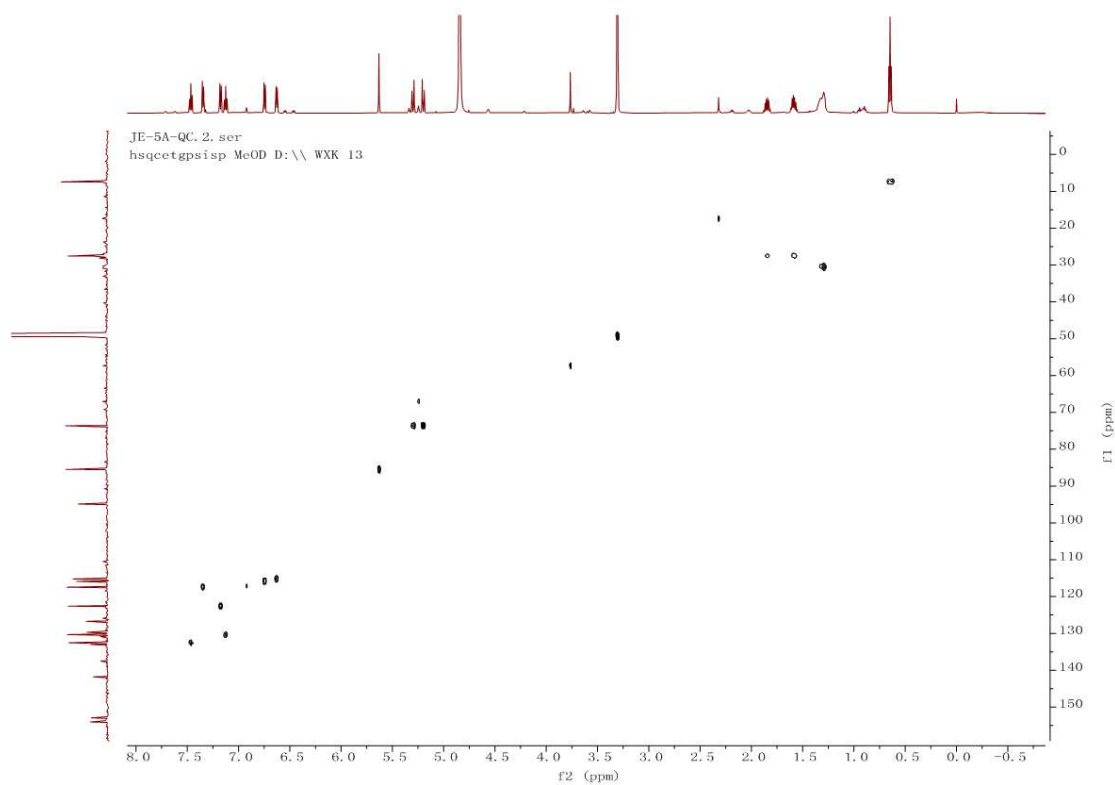

**S90 COSY spectrum of aspergorakhins J (10).**

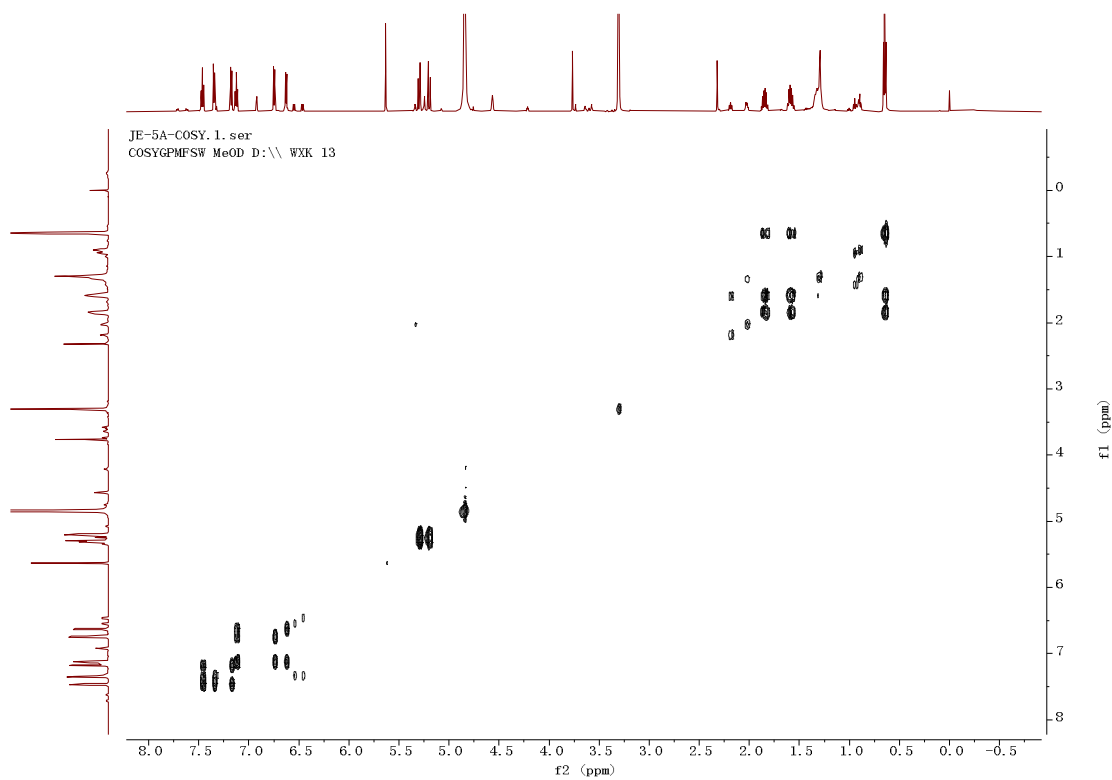

**S91 HMBC spectrum of aspergorakhins J (10).**

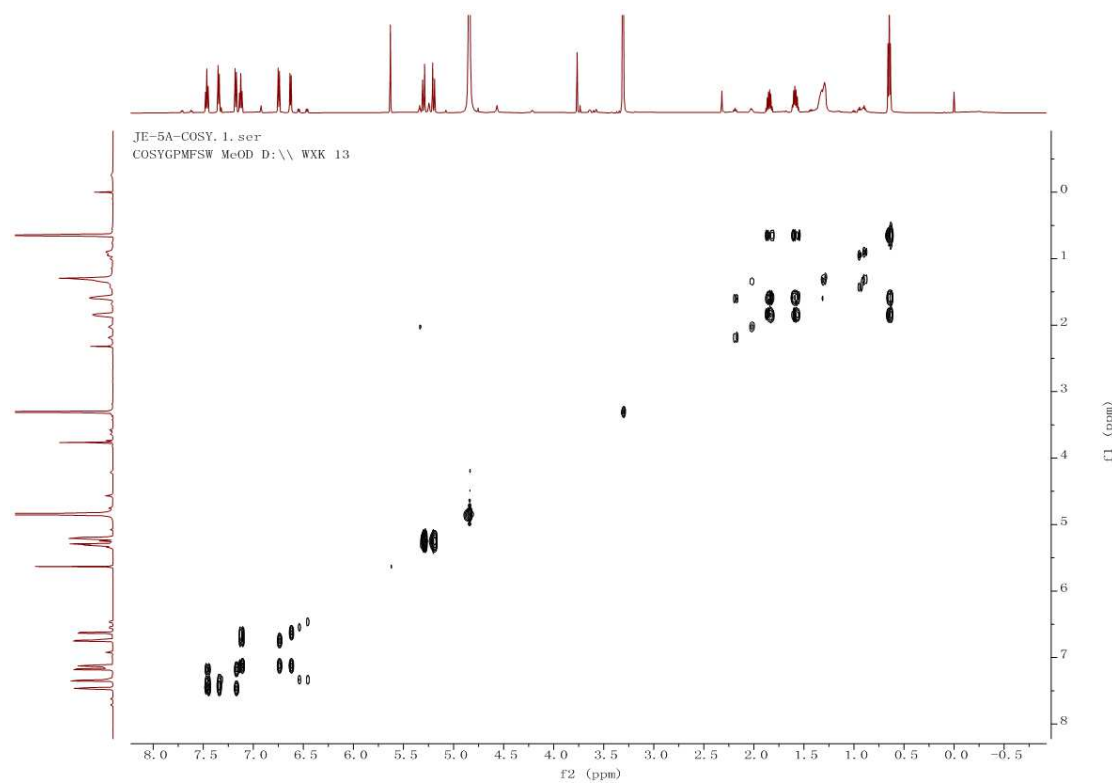

### S92 ESIMS spectrum of aspergorakhins J (10).

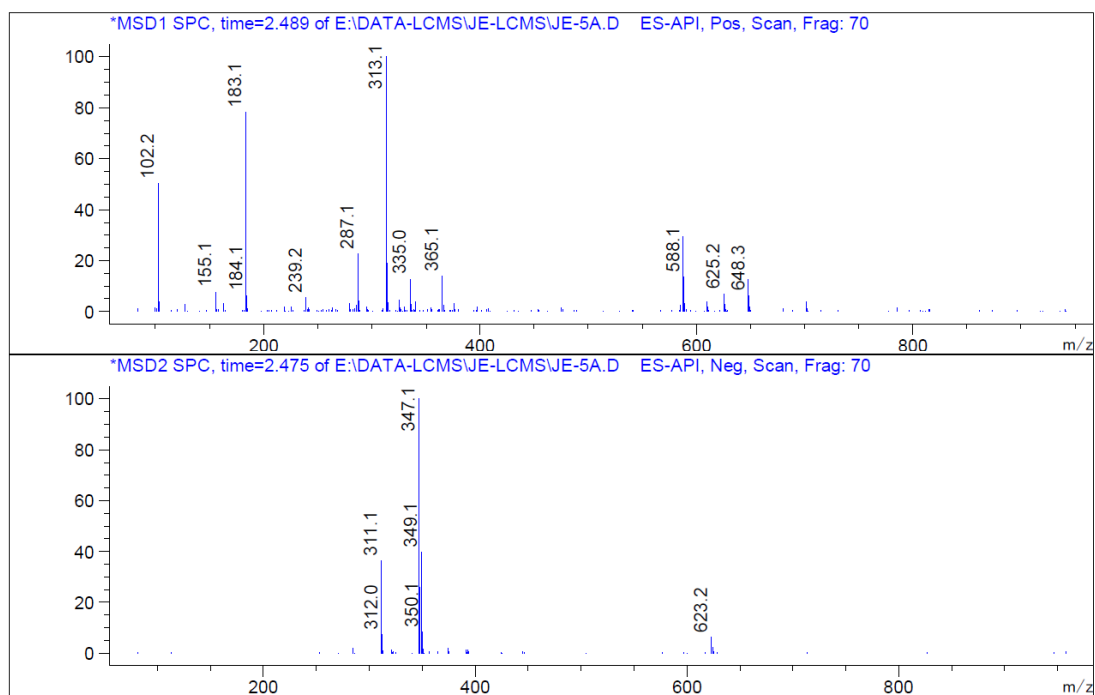

### S93 (+)-HRESIMS spectrum of aspergorakhins J (10).

Spectrum from JE-5A.wiff (sample 1) - JE-5A, Experiment 1, +TOF MS (200 - 1200) from 7.237 min

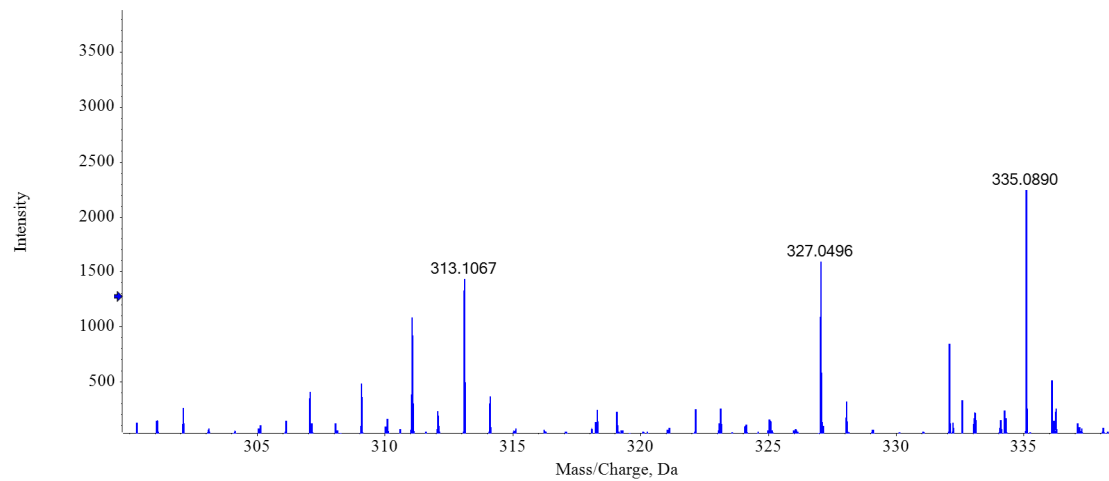

S94 UV spectrum of aspergorakhins J (10).

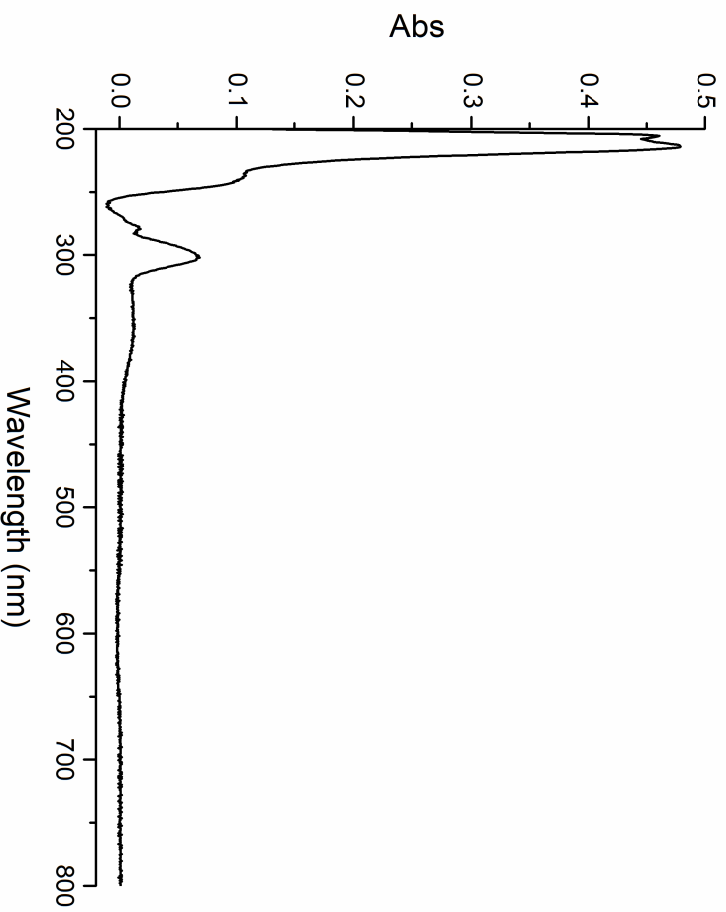

S95 IR spectrum of aspergorakhins J (10).

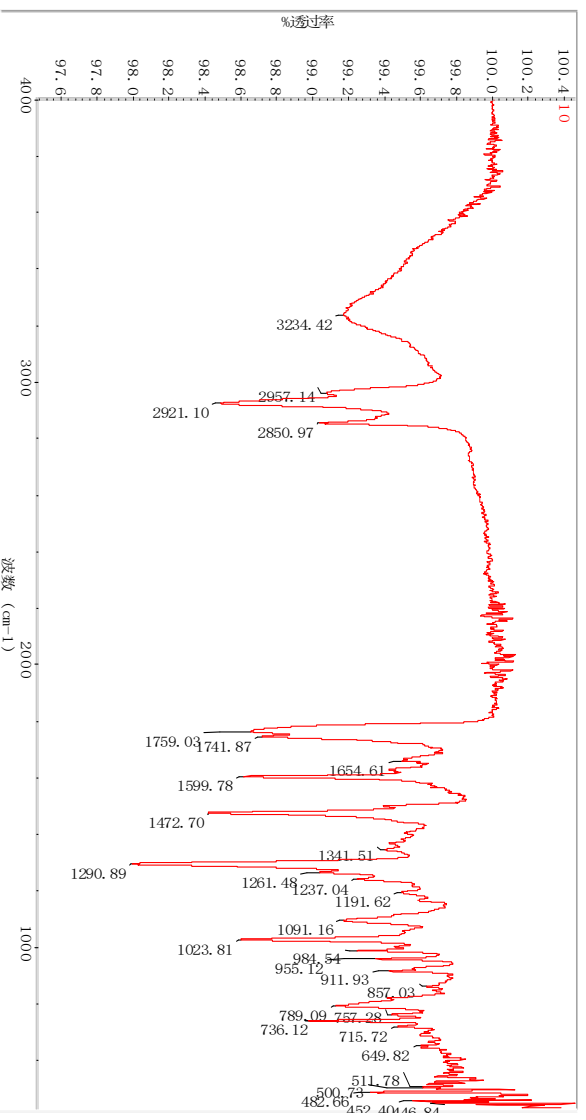

S96  $^1\text{H}$  NMR (700 MHz,  $\text{CDCl}_3$ ) spectrum of aspergorakhins K (11).

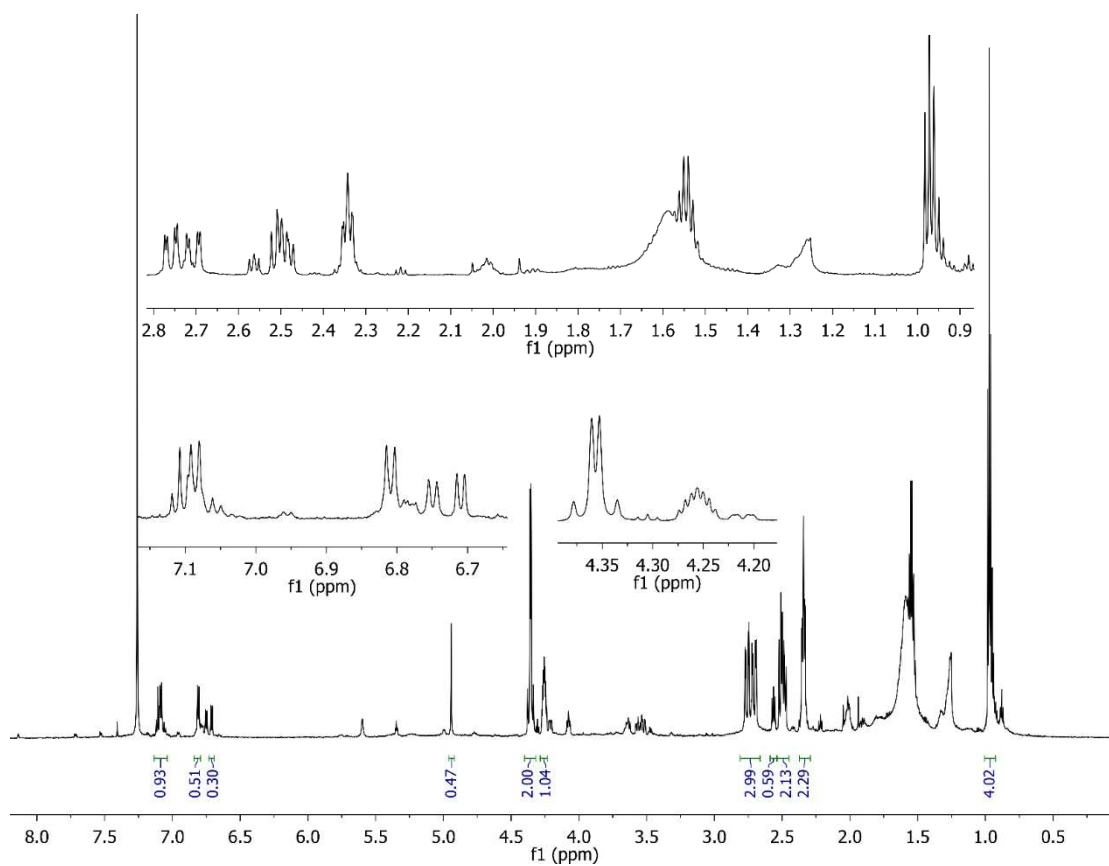

S97  $^{13}\text{C}$  NMR (175 MHz,  $\text{CDCl}_3$ ) spectrum of aspergorakhins K (11).

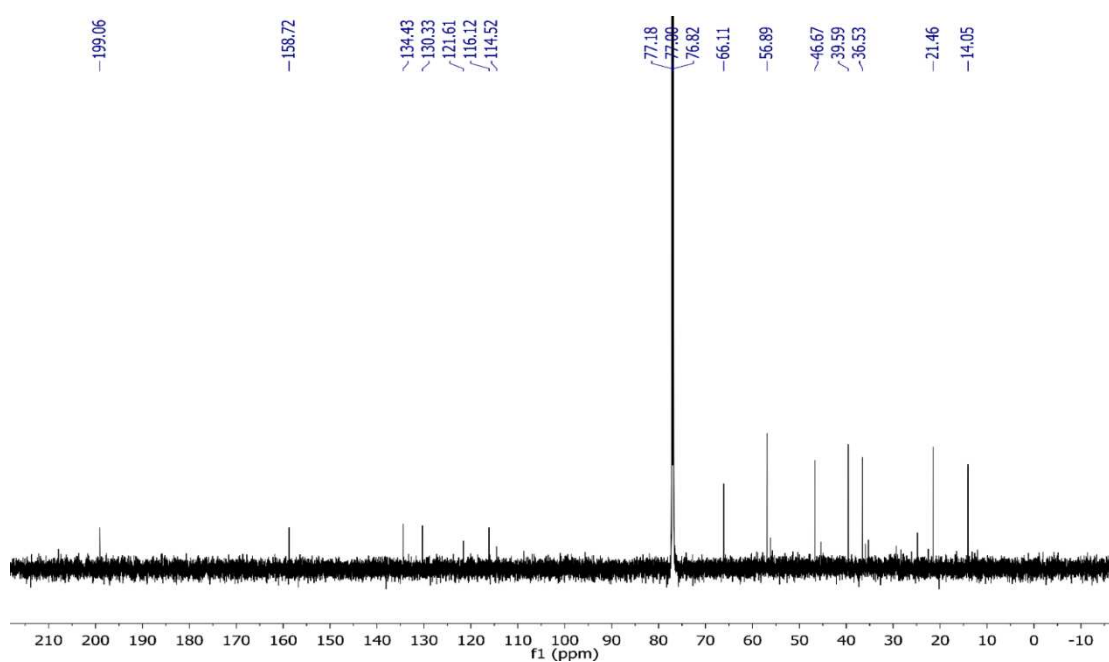

S98 HSQC spectrum of aspergorakhins K (11).

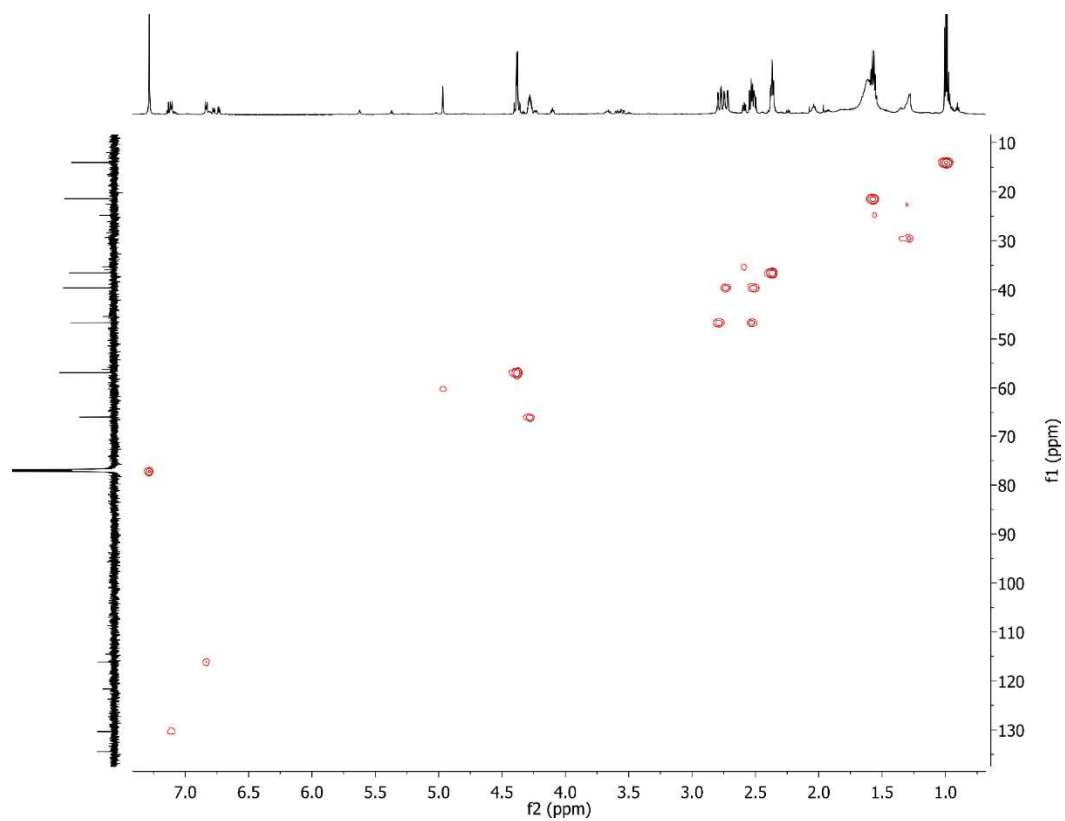

S99 COSY spectrum of aspergorakhins K (11).

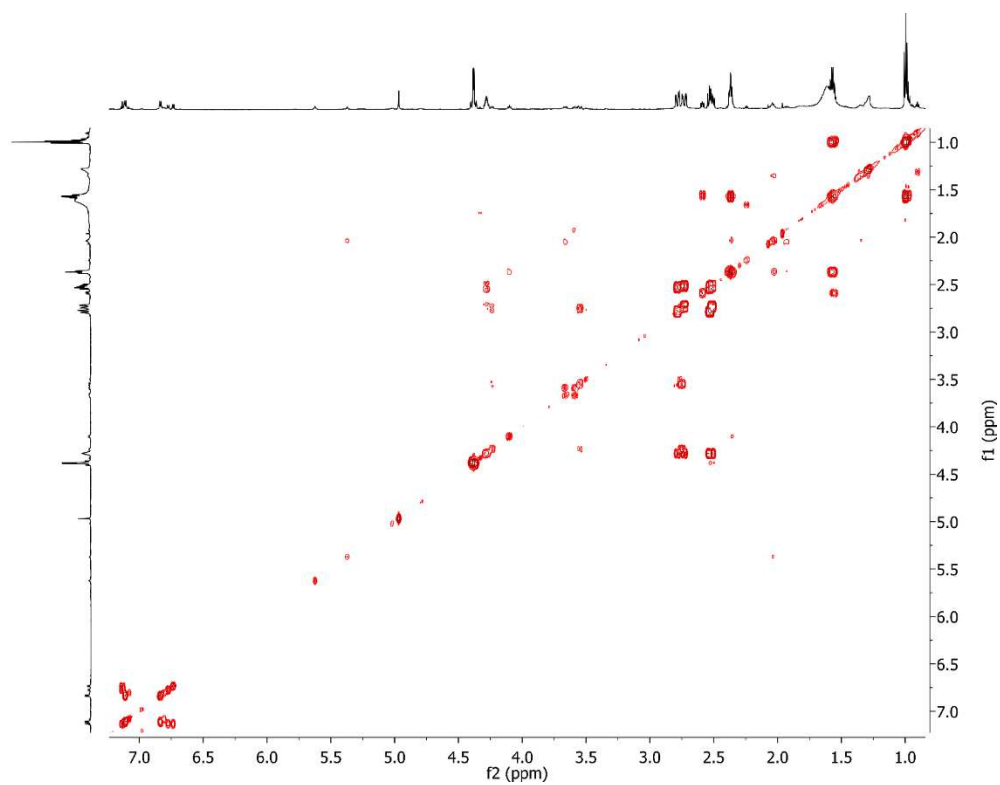

S100 HMBC spectrum of aspergorakhins K (11).

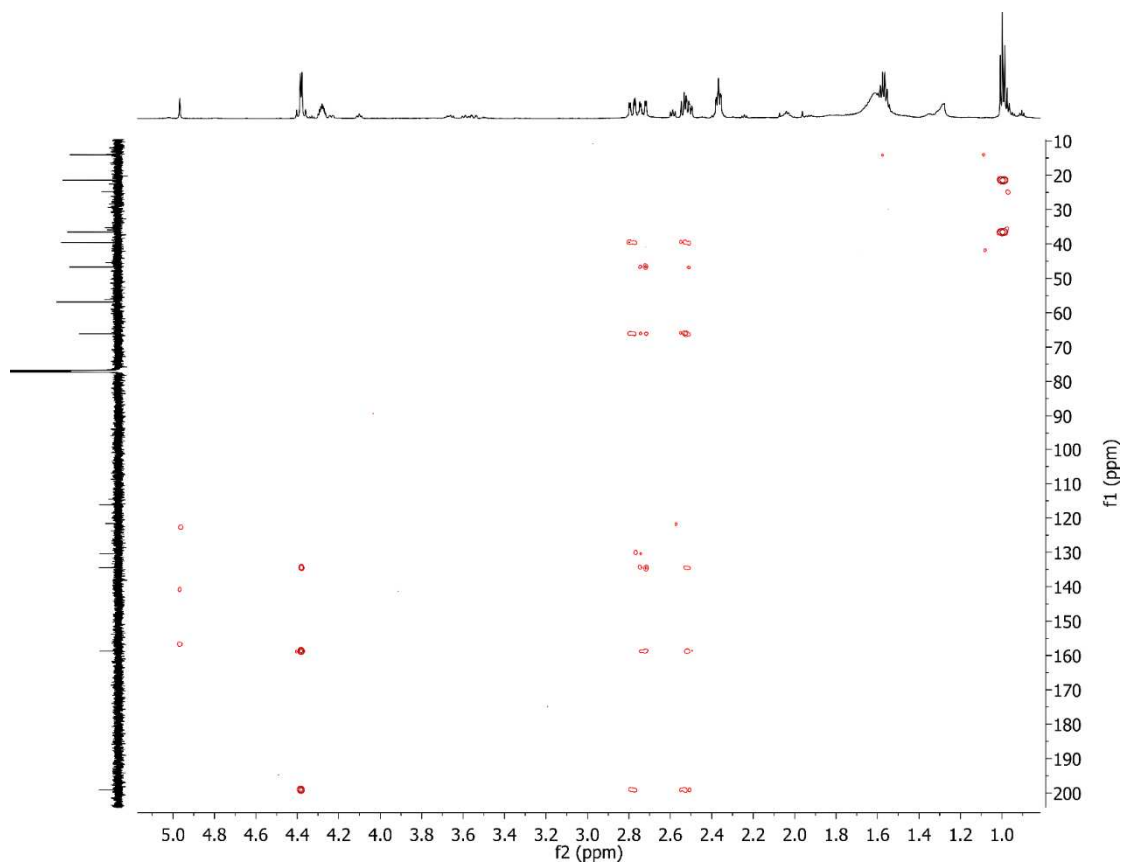

S101 (+)-HRESIMS spectrum of aspergorakhins K (11).

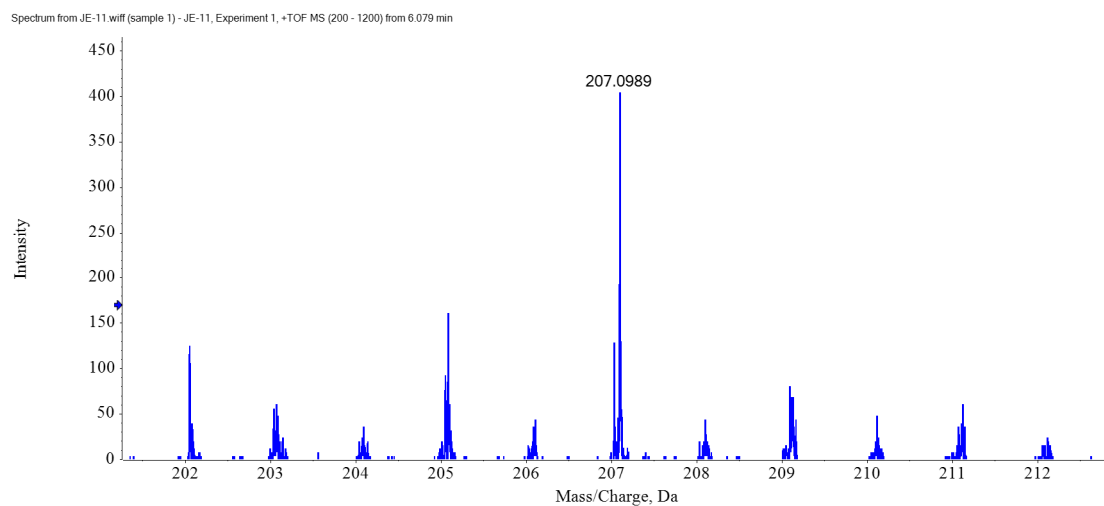



S102 UV spectrum of aspergorakhins K (11).

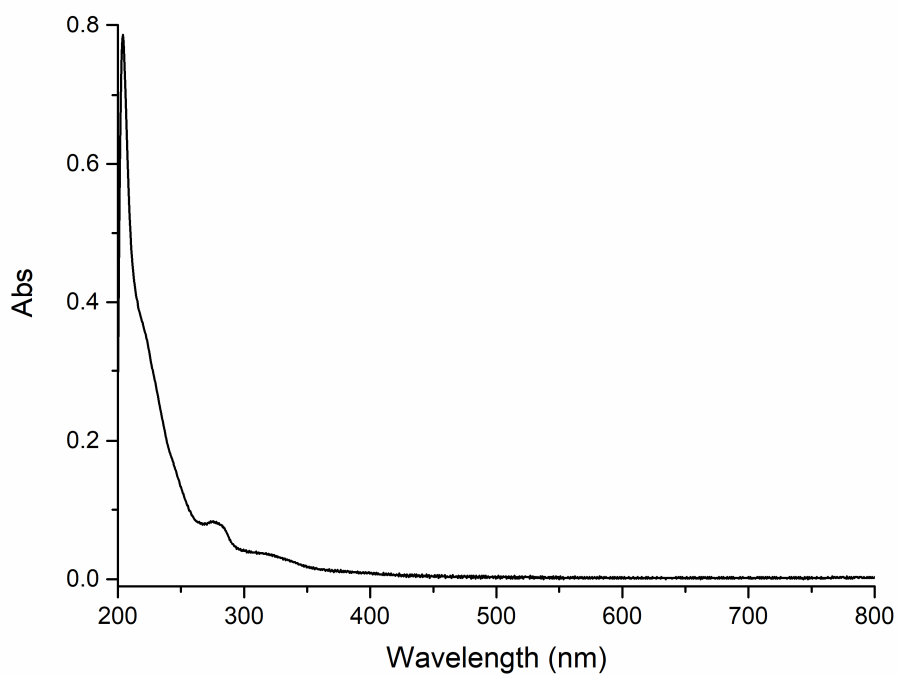

S103 IR spectrum of aspergorakhins K (11).

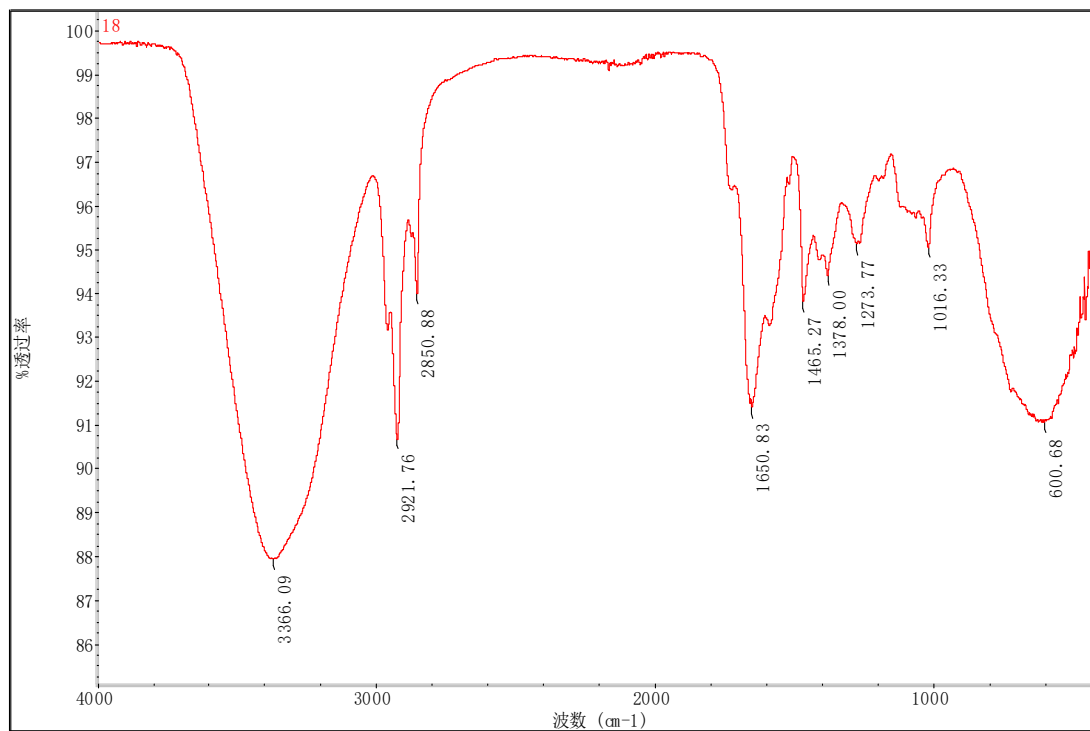

**S104**  $^1\text{H}$  NMR (600 MHz, Acetone- $d_6$ ) spectrum of aspergorakhins L (**12**).

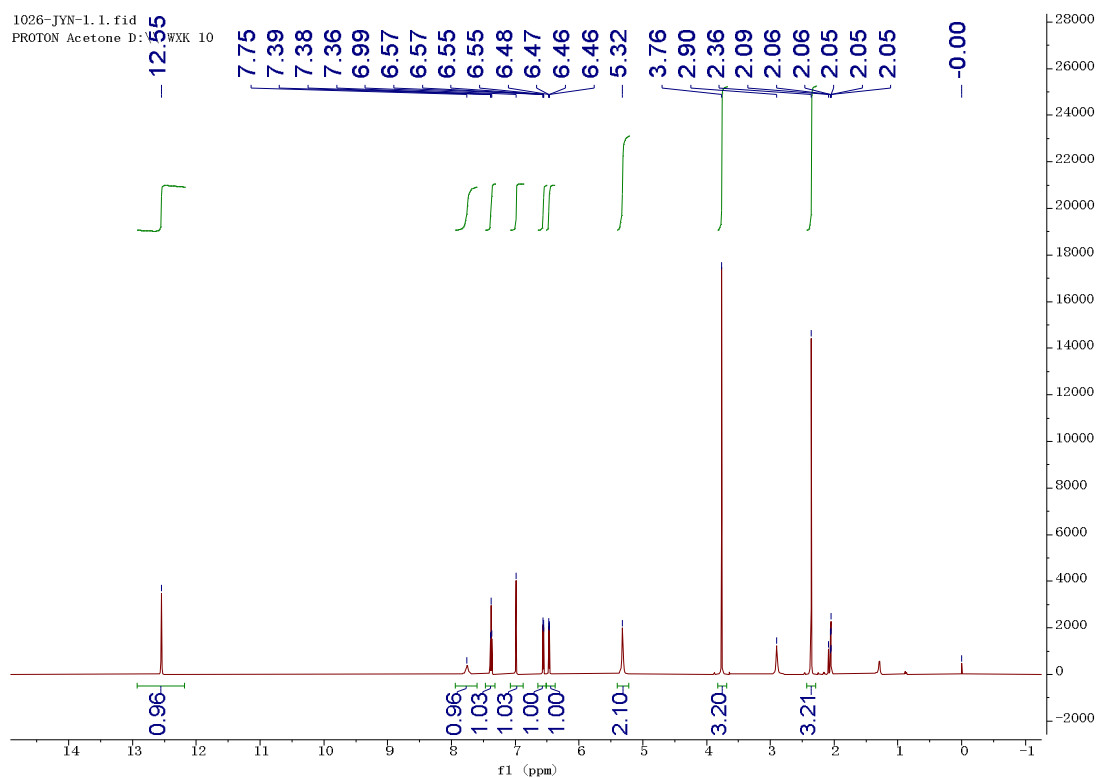

**S105**  $^{13}\text{C}$  NMR (150 MHz, Acetone- $d_6$ ) spectrum of aspergorakhins L (**12**).

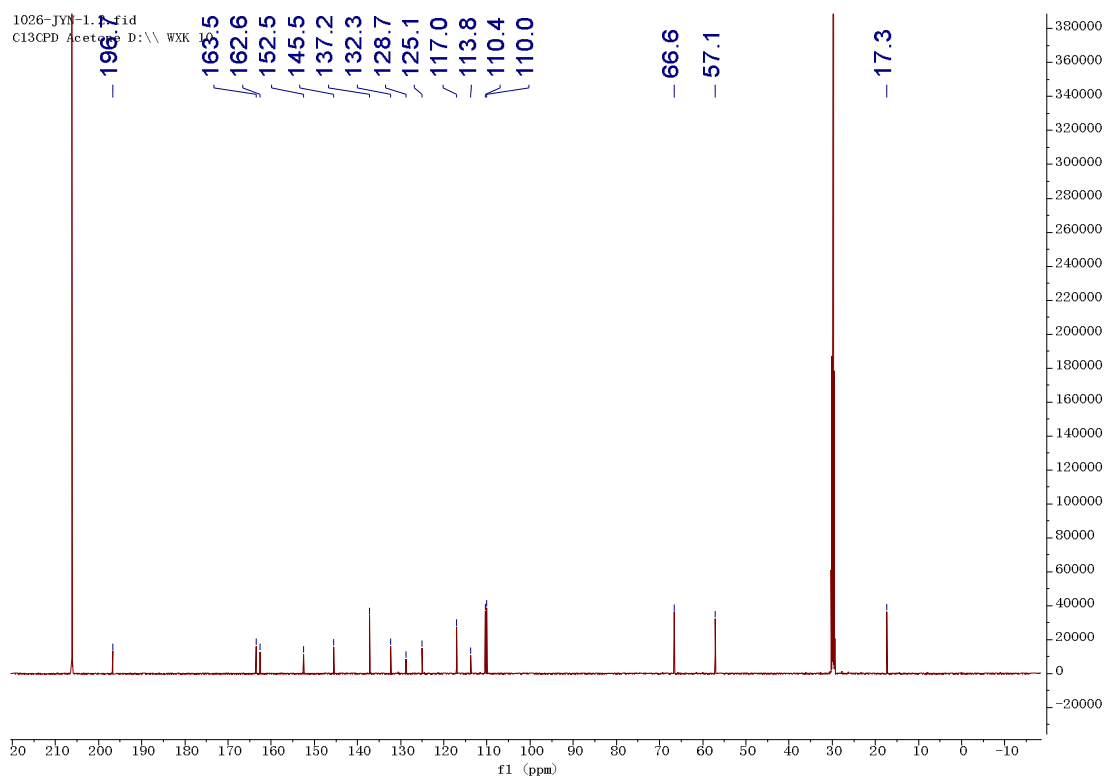

**S106 HSQC spectrum of aspergorakhins L (12).**

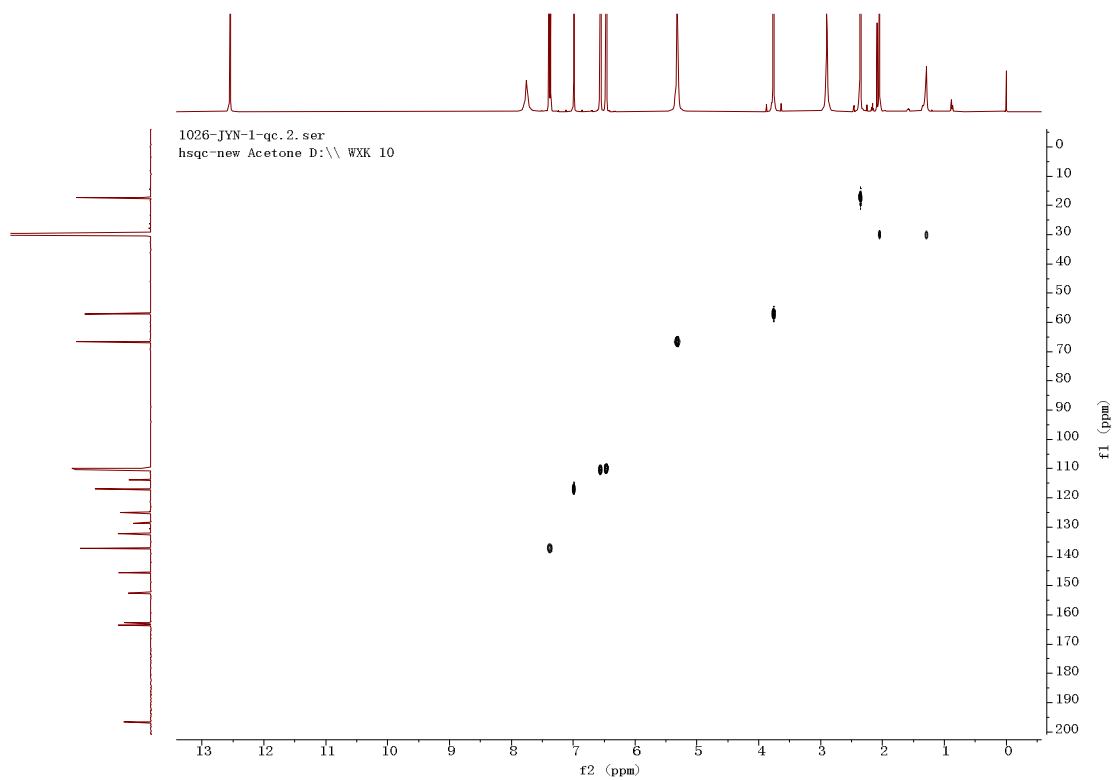

**S107 COSY spectrum of aspergorakhins L (12).**

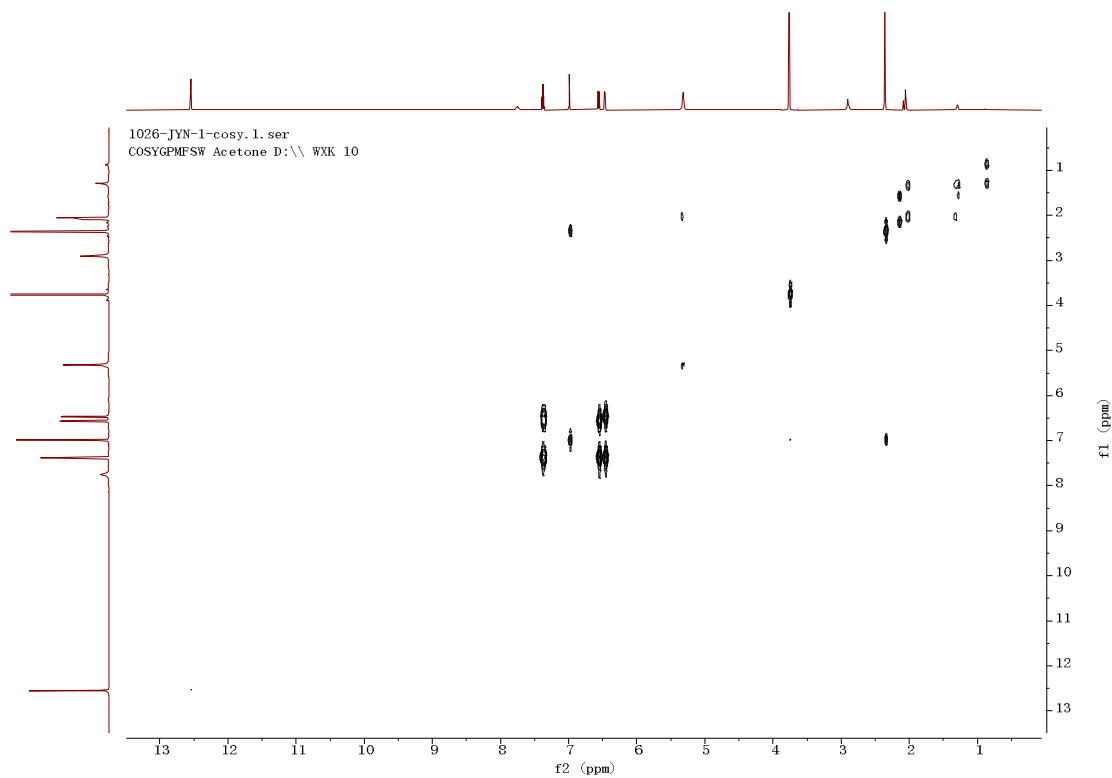

S108 HMBC spectrum of aspergorakhins L (12).

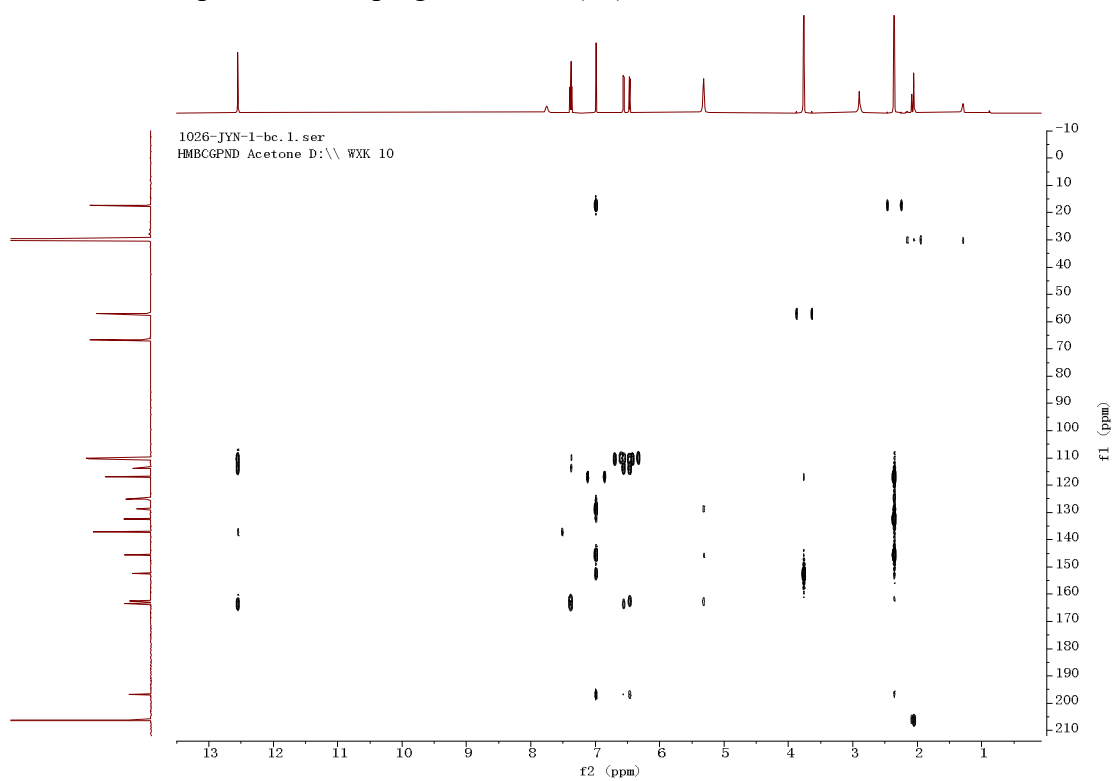

S109 NOESY spectrum of aspergorakhins L (12).

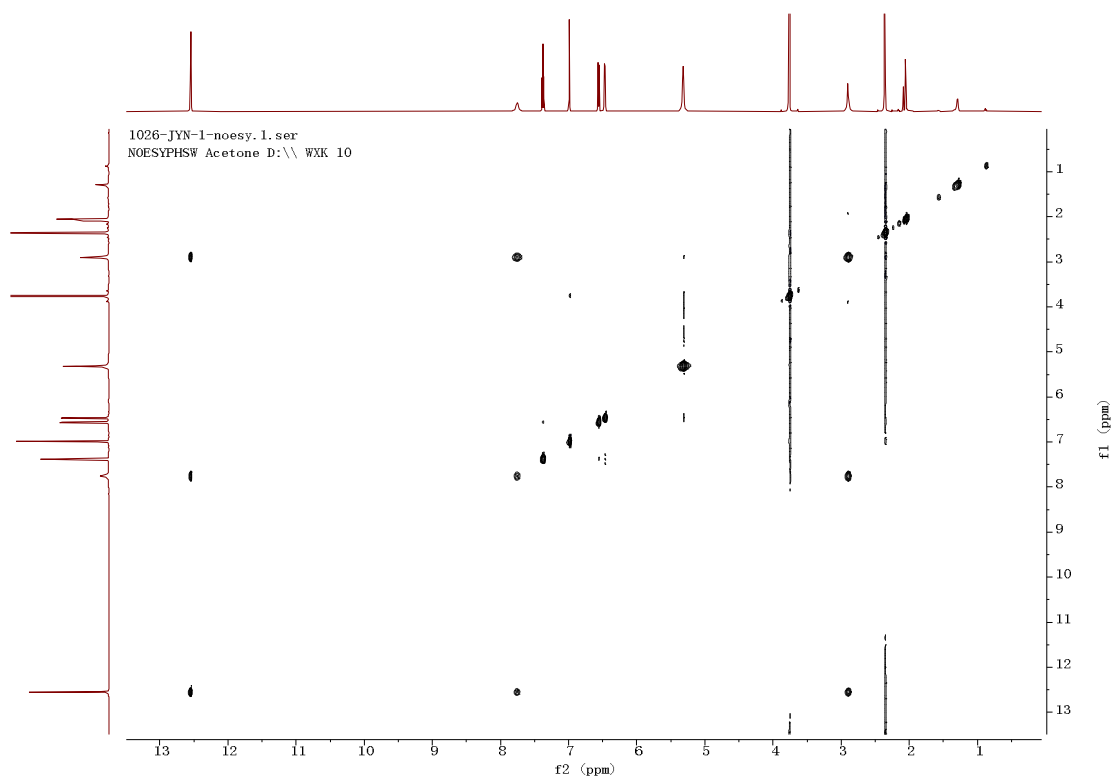

**S110 (+)-HRESIMS spectrum of aspergorakhins L (12).**

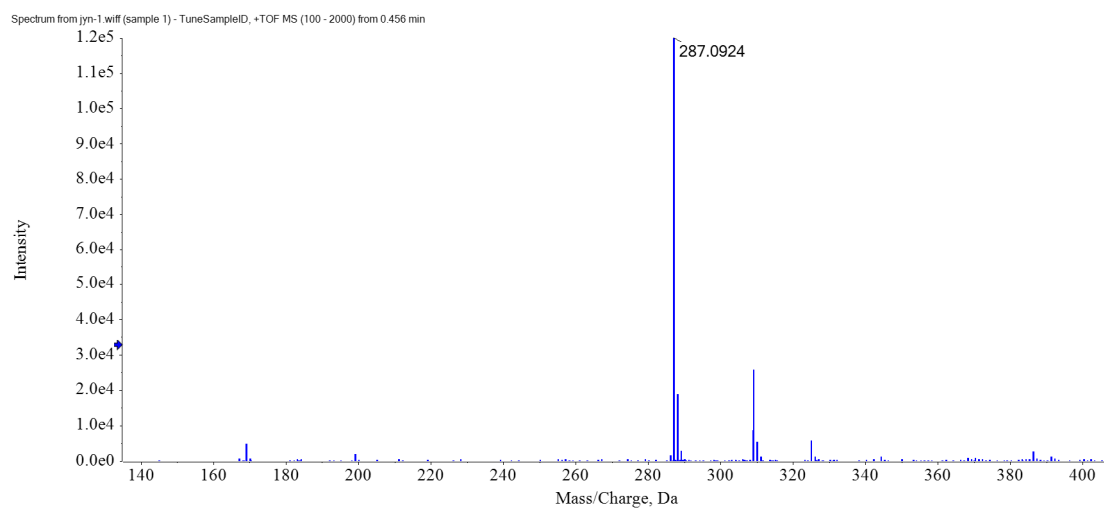

**S111 UV spectrum of aspergorakhins L (12).**

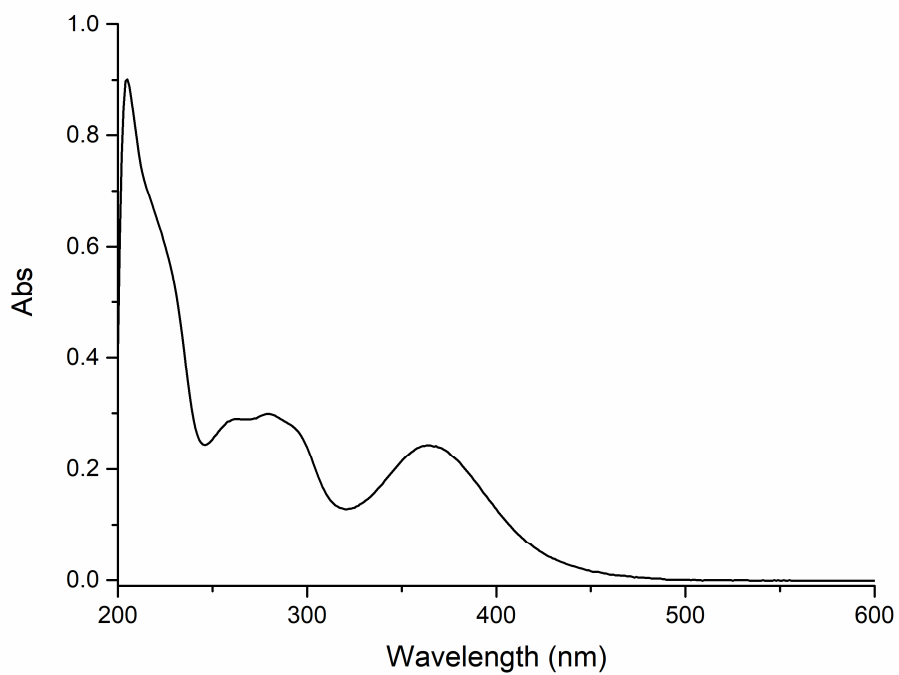

S112 IR spectrum of aspergorakhins L (12).

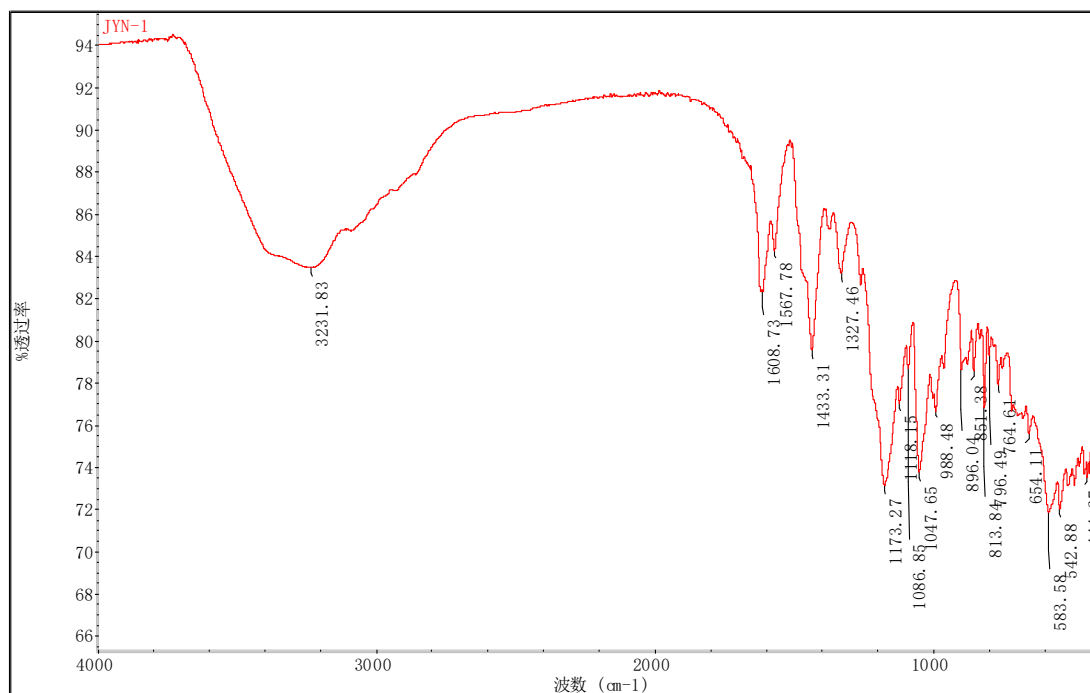

S113. Experimental ECD spectra of 5, 8-11.

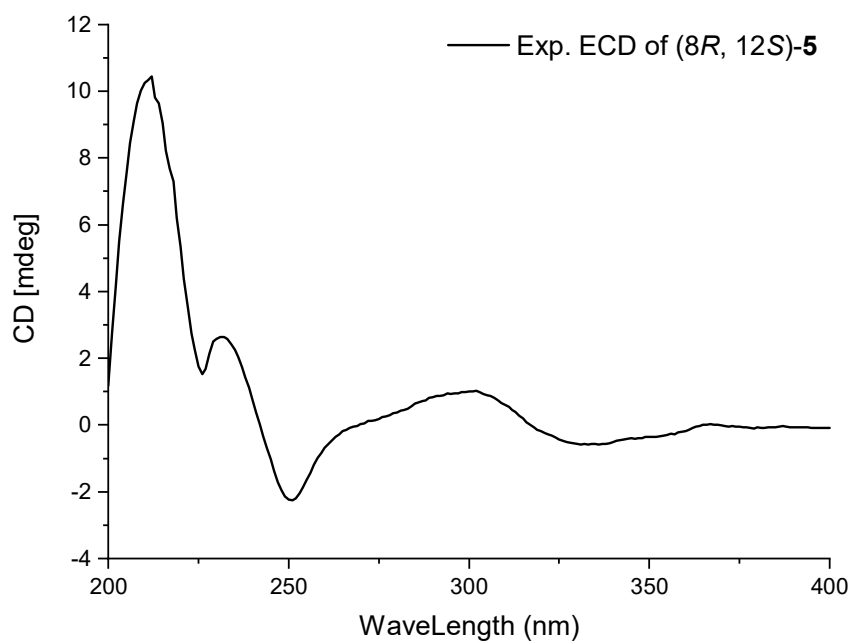

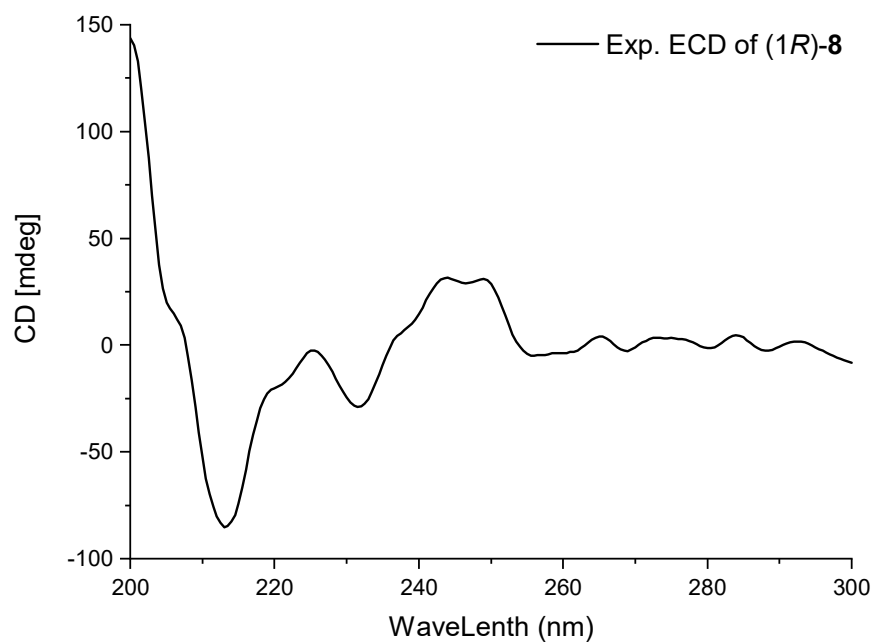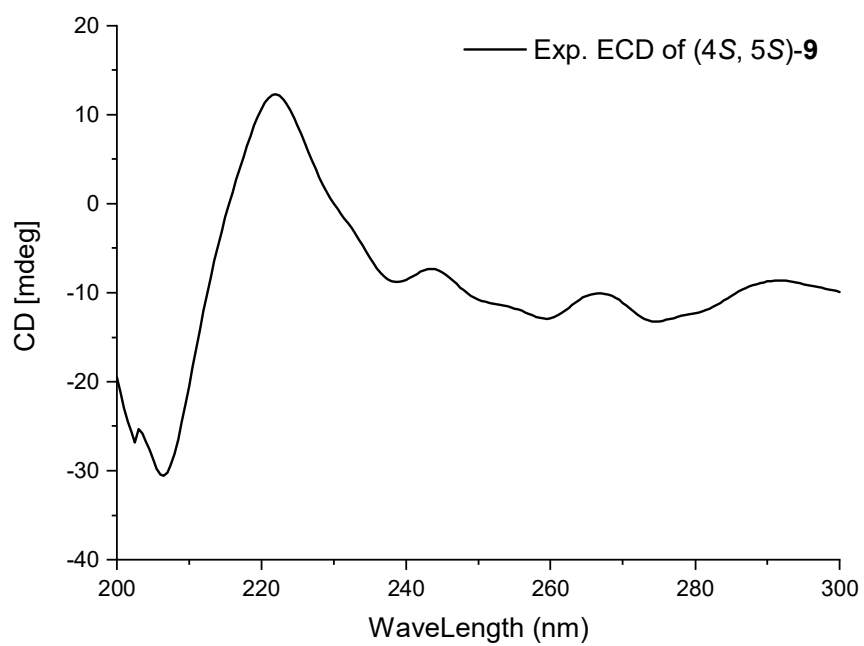

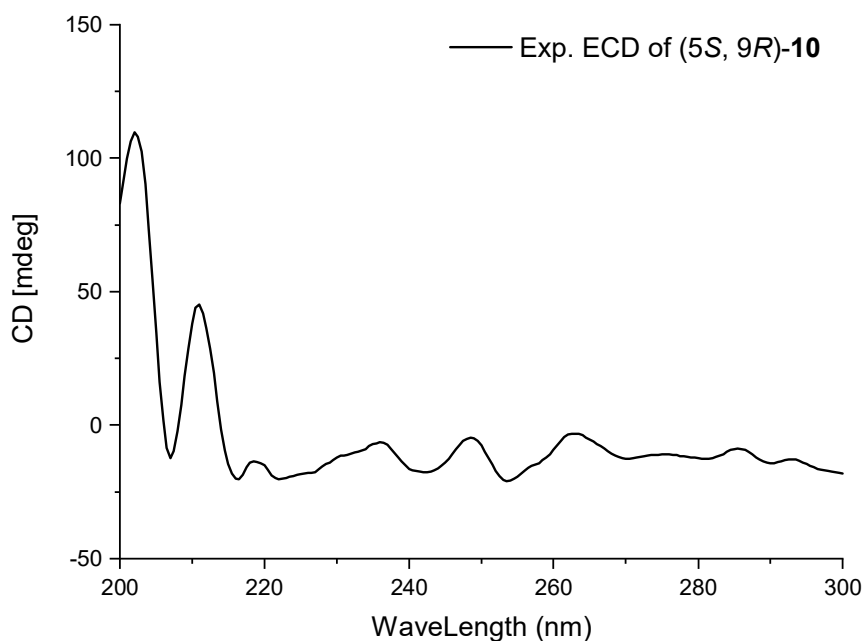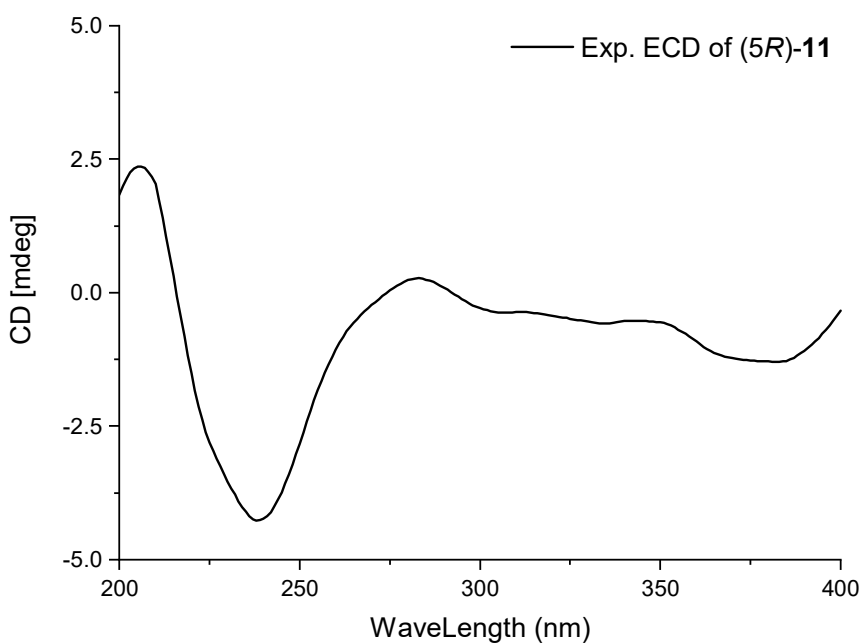

**S114.** Quantum chemical CD and OR calculation of models **5**, **8-11**.

### **ECD and OR calculation details**

#### 1. Methods

Monte Carlo conformational searches were performed by means of the BARISTA software (CONFLEX Corporation) using Merck Molecular Force Field (MMFF94S). The conformers with energy from 0-5 kcal/mol were used for optimization at the B3LYP/6-31G(d) level in the gas phase using the Gaussian 09 package. These



conformations with 0-2.5 kcal/mol were further optimized at the B3LYP/6-311+G(d) level in the gas phase. Calculation of ECD and OR were performed at the B3LYP/6-311++G(2d,p) level. Compounds **5**, **8-11** was selected for the calculations. The Boltzmann sums were performed to simulate the ECD curves and OR values for the selected chiral compounds. ECD spectra were generated using the program SpecDis 1.6 (University of Würzburg, Würzburg, Germany) and GraphPad Prism 5 (University of California San Diego, San Diego, CA, USA) from dipole-length rotational strengths by applying Gaussian band shapes with  $\sigma = 0.3$  eV.

## 2. Results

**Table S114.2.1.** Gibbs Free Energies<sup>a</sup> and Equilibrium Populations<sup>b</sup> of Low-energy conformers of model (8*R*,12*S*)-**5** in MeOH (PCM).

| Conformers | $\Delta G^a$ | $P$ (%) <sup>b</sup> |
|------------|--------------|----------------------|
| <b>A</b>   | 0.33         | 26.21                |
| <b>B</b>   | 1.08         | 7.43                 |
| <b>C</b>   | 1.41         | 4.25                 |
| <b>D</b>   | 0.00         | 45.92                |
| <b>E</b>   | 0.62         | 16.20                |

<sup>a</sup>B3LYP/6-311++G(2d,p), in kcal/mol. <sup>b</sup>From  $G$  values at 298.15K.

**Table S114.2.2.** Cartesian Coordinates, Relative Thermal Free Energies (B3LYP/6-311++G(2d,p) PCM/MeOH), and Equilibrium Populations of Low-energy Conformers of model **5** in MeOH (PCM).

| Conformation A             |   |           |                   |           |
|----------------------------|---|-----------|-------------------|-----------|
| $\Delta G = 0.33$ kcal/mol |   |           | $P(\%) = 26.21\%$ |           |
| 1                          | C | -1.759502 | 1.396434          | 0.812176  |
| 2                          | C | -0.671861 | 2.021614          | 1.406137  |
| 3                          | C | 0.603876  | 1.772688          | 0.920270  |
| 4                          | C | 0.868066  | 0.913678          | -0.144630 |
| 5                          | C | -0.213030 | 0.268284          | -0.771657 |
| 6                          | C | -1.497331 | 0.535244          | -0.265314 |
| 7                          | C | 0.338739  | -3.183655         | -2.569438 |
| 8                          | C | 0.667003  | -2.017074         | -1.597534 |
| 9                          | C | -0.017807 | -0.671870         | -1.945125 |
| 10                         | C | -0.526677 | 2.986971          | 2.563468  |
| 11                         | O | 0.915147  | 3.233870          | 2.648059  |
| 12                         | C | 1.580734  | 2.523477          | 1.697720  |
| 13                         | O | 2.791729  | 2.539495          | 1.553731  |
| 14                         | C | -1.033231 | 2.468537          | 3.909589  |
| 15                         | C | -0.824013 | 3.459360          | 5.057220  |
| 16                         | O | 2.089098  | -1.907475         | -1.620544 |
| 17                         | O | 2.149058  | 0.714680          | -0.557775 |
| 18                         | O | 1.132530  | -4.299256         | -2.154738 |
| 19                         | C | -1.113139 | -3.645842         | -2.432411 |

|    |   |           |           |           |
|----|---|-----------|-----------|-----------|
| 20 | C | 0.679596  | -2.826514 | -4.025284 |
| 21 | H | -0.986115 | 3.958065  | 2.338764  |
| 22 | H | -2.778542 | 1.556526  | 1.148959  |
| 23 | H | -2.337510 | 0.041826  | -0.747160 |
| 24 | H | 0.333448  | -2.338820 | -0.597820 |
| 25 | H | 0.583210  | -0.185012 | -2.721722 |
| 26 | H | -1.001941 | -0.867524 | -2.380132 |
| 27 | H | -2.100195 | 2.240401  | 3.791753  |
| 28 | H | -0.530004 | 1.518430  | 4.122803  |
| 29 | H | -1.352476 | 4.400800  | 4.870310  |
| 30 | H | 0.237061  | 3.688184  | 5.184570  |
| 31 | H | -1.199806 | 3.046054  | 5.997539  |
| 32 | H | 2.351594  | -1.099995 | -1.152366 |
| 33 | H | 2.735778  | 1.256893  | 0.014362  |
| 34 | H | 2.014147  | -3.934648 | -1.979222 |
| 35 | H | -1.823236 | -2.896415 | -2.794721 |
| 36 | H | -1.345861 | -3.881011 | -1.389391 |
| 37 | H | -1.254168 | -4.556573 | -3.021074 |
| 38 | H | 0.032040  | -2.037000 | -4.422071 |
| 39 | H | 0.558729  | -3.714981 | -4.651020 |
| 40 | H | 1.716860  | -2.488843 | -4.097281 |

Conformation B

$\Delta G = 1.08$  kcal/mol

P(%) = 7.43%

|    |   |           |           |           |
|----|---|-----------|-----------|-----------|
| 1  | C | -0.102310 | 2.225025  | 1.270923  |
| 2  | C | -0.787580 | 2.648705  | 0.140497  |
| 3  | C | -1.359242 | 1.704478  | -0.700379 |
| 4  | C | -1.283017 | 0.330491  | -0.480877 |
| 5  | C | -0.598108 | -0.131297 | 0.657695  |
| 6  | C | -0.027986 | 0.841300  | 1.498062  |
| 7  | C | 1.062779  | -3.691895 | 0.629011  |
| 8  | C | 0.433008  | -2.411935 | 0.014287  |
| 9  | C | -0.474666 | -1.607951 | 0.978781  |
| 10 | C | -1.093619 | 4.011647  | -0.446302 |
| 11 | O | -1.847872 | 3.715559  | -1.666879 |
| 12 | C | -2.011534 | 2.373654  | -1.818240 |
| 13 | O | -2.608274 | 1.856969  | -2.748102 |
| 14 | C | 0.111937  | 4.891829  | -0.789806 |
| 15 | C | 1.120478  | 4.250286  | -1.745264 |
| 16 | O | -0.286125 | -2.868606 | -1.129897 |
| 17 | O | -1.863551 | -0.532161 | -1.358305 |
| 18 | O | 1.772400  | -4.347437 | -0.426167 |
| 19 | C | 2.120585  | -3.354992 | 1.681499  |

|    |   |           |           |           |
|----|---|-----------|-----------|-----------|
| 20 | C | -0.007884 | -4.640641 | 1.191957  |
| 21 | H | -1.778149 | 4.572183  | 0.202109  |
| 22 | H | 0.361447  | 2.918801  | 1.964629  |
| 23 | H | 0.500877  | 0.491608  | 2.380991  |
| 24 | H | 1.271819  | -1.771565 | -0.302713 |
| 25 | H | -1.464213 | -2.079256 | 0.971849  |
| 26 | H | -0.088013 | -1.694321 | 1.998129  |
| 27 | H | -0.270057 | 5.826109  | -1.215974 |
| 28 | H | 0.597353  | 5.157144  | 0.158188  |
| 29 | H | 0.646747  | 3.989311  | -2.695610 |
| 30 | H | 1.557107  | 3.341833  | -1.319550 |
| 31 | H | 1.936837  | 4.945965  | -1.958859 |
| 32 | H | -0.814838 | -2.136357 | -1.482663 |
| 33 | H | -2.279440 | 0.001040  | -2.071379 |
| 34 | H | 1.178585  | -4.313912 | -1.192547 |
| 35 | H | 1.684359  | -2.908859 | 2.580320  |
| 36 | H | 2.867468  | -2.668743 | 1.270884  |
| 37 | H | 2.635382  | -4.273542 | 1.976667  |
| 38 | H | 0.465424  | -5.580208 | 1.489720  |
| 39 | H | -0.759281 | -4.856453 | 0.427811  |
| 40 | H | -0.516835 | -4.220805 | 2.066501  |

Conformation C

$\Delta G = 1.41$  kcal/mol

P(%) = 4.25%

|    |   |           |           |           |
|----|---|-----------|-----------|-----------|
| 1  | C | 1.060077  | 2.080484  | -0.456305 |
| 2  | C | -0.046296 | 2.647062  | 0.164430  |
| 3  | C | -0.839184 | 1.852090  | 0.982089  |
| 4  | C | -0.601660 | 0.498201  | 1.211162  |
| 5  | C | 0.505595  | -0.105114 | 0.587999  |
| 6  | C | 1.302513  | 0.716322  | -0.227582 |
| 7  | C | 0.438304  | -3.949629 | -0.208059 |
| 8  | C | -0.162447 | -2.566084 | 0.163190  |
| 9  | C | 0.844535  | -1.568738 | 0.789833  |
| 10 | C | -0.649851 | 4.038829  | 0.183119  |
| 11 | O | -1.783797 | 3.926020  | 1.103435  |
| 12 | C | -1.912289 | 2.651407  | 1.556794  |
| 13 | O | -2.788400 | 2.280479  | 2.320528  |
| 14 | C | -1.181614 | 4.575555  | -1.150110 |
| 15 | C | -0.082451 | 4.946360  | -2.149554 |
| 16 | O | -1.238031 | -2.858688 | 1.053488  |
| 17 | O | -1.428320 | -0.208940 | 2.027720  |
| 18 | O | -0.647843 | -4.758203 | -0.669612 |
| 19 | C | 1.402001  | -3.850301 | -1.391885 |

|    |   |           |           |           |
|----|---|-----------|-----------|-----------|
| 20 | C | 1.101906  | -4.626849 | 1.001993  |
| 21 | H | 0.036902  | 4.768121  | 0.630863  |
| 22 | H | 1.732581  | 2.652739  | -1.085284 |
| 23 | H | 2.166630  | 0.260655  | -0.704253 |
| 24 | H | -0.557414 | -2.135353 | -0.770923 |
| 25 | H | 0.910506  | -1.796017 | 1.860095  |
| 26 | H | 1.838017  | -1.740538 | 0.366249  |
| 27 | H | -1.856131 | 3.827173  | -1.581102 |
| 28 | H | -1.789513 | 5.456880  | -0.919350 |
| 29 | H | 0.483366  | 4.069812  | -2.477737 |
| 30 | H | 0.623478  | 5.666992  | -1.721668 |
| 31 | H | -0.520995 | 5.404202  | -3.040550 |
| 32 | H | -1.582794 | -2.026897 | 1.413381  |
| 33 | H | -2.119193 | 0.406676  | 2.359732  |
| 34 | H | -1.370027 | -4.597618 | -0.042077 |
| 35 | H | 2.317794  | -3.308442 | -1.137475 |
| 36 | H | 0.919873  | -3.354858 | -2.240049 |
| 37 | H | 1.683068  | -4.858707 | -1.707931 |
| 38 | H | 1.391214  | -5.645477 | 0.729444  |
| 39 | H | 0.399388  | -4.676698 | 1.838074  |
| 40 | H | 1.998503  | -4.093908 | 1.336892  |

Conformation D

$\Delta G = 0.00$  kcal/mol

P(%) = 45.92%

|    |   |           |           |           |
|----|---|-----------|-----------|-----------|
| 1  | C | 1.121008  | 1.981383  | -0.879238 |
| 2  | C | 0.152998  | 2.591896  | -0.093039 |
| 3  | C | -0.466634 | 1.863217  | 0.912228  |
| 4  | C | -0.174908 | 0.528282  | 1.182237  |
| 5  | C | 0.802762  | -0.118282 | 0.406909  |
| 6  | C | 1.421629  | 0.637943  | -0.603960 |
| 7  | C | 0.725314  | -4.064948 | 0.138091  |
| 8  | C | 0.205136  | -2.598868 | 0.060329  |
| 9  | C | 1.186460  | -1.563847 | 0.650587  |
| 10 | C | -0.451302 | 3.980024  | -0.072786 |
| 11 | O | -1.428291 | 3.932182  | 1.017938  |
| 12 | C | -1.448976 | 2.697954  | 1.591122  |
| 13 | O | -2.181413 | 2.383740  | 2.513855  |
| 14 | C | -1.152375 | 4.400749  | -1.364623 |
| 15 | C | -1.788737 | 5.790354  | -1.283053 |
| 16 | O | -1.043502 | -2.608560 | 0.758916  |
| 17 | O | -0.830016 | -0.133676 | 2.174943  |
| 18 | O | 0.811230  | -4.426226 | 1.518272  |
| 19 | C | -0.270461 | -4.990660 | -0.584663 |

|    |   |           |           |           |
|----|---|-----------|-----------|-----------|
| 20 | C | 2.125940  | -4.243661 | -0.449256 |
| 21 | H | 0.287899  | 4.737826  | 0.217008  |
| 22 | H | 1.639845  | 2.506011  | -1.674946 |
| 23 | H | 2.184150  | 0.145721  | -1.202378 |
| 24 | H | 0.026053  | -2.346679 | -0.997516 |
| 25 | H | 1.283401  | -1.765539 | 1.722905  |
| 26 | H | 2.171950  | -1.726278 | 0.208141  |
| 27 | H | -0.405165 | 4.369364  | -2.167752 |
| 28 | H | -1.907158 | 3.643872  | -1.607194 |
| 29 | H | -1.036905 | 6.559947  | -1.075807 |
| 30 | H | -2.537947 | 5.828628  | -0.488259 |
| 31 | H | -2.278342 | 6.046987  | -2.226834 |
| 32 | H | -1.125863 | -1.811650 | 1.304742  |
| 33 | H | -1.472480 | 0.490085  | 2.578378  |
| 34 | H | -0.044053 | -4.152345 | 1.888333  |
| 35 | H | -0.291046 | -4.791631 | -1.662219 |
| 36 | H | -1.280823 | -4.850158 | -0.193564 |
| 37 | H | 0.025594  | -6.031945 | -0.429640 |
| 38 | H | 2.376645  | -5.307632 | -0.483994 |
| 39 | H | 2.881093  | -3.748932 | 0.166195  |
| 40 | H | 2.181287  | -3.848649 | -1.469410 |

Conformation E

$\Delta G = 0.62$  kcal/mol

P(%) = 16.20%

|    |   |           |           |           |
|----|---|-----------|-----------|-----------|
| 1  | C | -1.951804 | 1.430200  | 0.997992  |
| 2  | C | -0.914631 | 2.257098  | 1.408893  |
| 3  | C | 0.312827  | 2.178992  | 0.766485  |
| 4  | C | 0.574720  | 1.300832  | -0.282410 |
| 5  | C | -0.454491 | 0.451885  | -0.724043 |
| 6  | C | -1.691646 | 0.548271  | -0.063132 |
| 7  | C | 0.507406  | -2.884492 | -2.621187 |
| 8  | C | 0.488868  | -1.819076 | -1.485454 |
| 9  | C | -0.249504 | -0.519111 | -1.869090 |
| 10 | C | -0.789160 | 3.321129  | 2.480388  |
| 11 | O | 0.597548  | 3.779752  | 2.370544  |
| 12 | C | 1.245285  | 3.121539  | 1.370898  |
| 13 | O | 2.409917  | 3.314559  | 1.065836  |
| 14 | C | -1.068998 | 2.875409  | 3.918844  |
| 15 | C | -0.210422 | 1.705569  | 4.404329  |
| 16 | O | 1.864970  | -1.577739 | -1.176261 |
| 17 | O | 1.806242  | 1.265263  | -0.861163 |
| 18 | O | 1.280174  | -2.358861 | -3.702602 |
| 19 | C | 1.160230  | -4.173856 | -2.090183 |

|    |   |           |           |           |
|----|---|-----------|-----------|-----------|
| 20 | C | -0.880195 | -3.194417 | -3.184297 |
| 21 | H | -1.414132 | 4.190714  | 2.242753  |
| 22 | H | -2.932649 | 1.453484  | 1.461788  |
| 23 | H | -2.494301 | -0.100678 | -0.404518 |
| 24 | H | -0.008155 | -2.256157 | -0.604158 |
| 25 | H | 0.305841  | -0.044879 | -2.685563 |
| 26 | H | -1.233415 | -0.779990 | -2.265717 |
| 27 | H | -0.924696 | 3.744861  | 4.569759  |
| 28 | H | -2.134556 | 2.617981  | 3.974375  |
| 29 | H | 0.852842  | 1.957196  | 4.361824  |
| 30 | H | -0.373724 | 0.807935  | 3.800426  |
| 31 | H | -0.454392 | 1.460360  | 5.441835  |
| 32 | H | 2.015099  | -0.629233 | -1.043985 |
| 33 | H | 2.373757  | 1.920633  | -0.399579 |
| 34 | H | 2.090946  | -2.033159 | -3.278363 |
| 35 | H | 0.542744  | -4.645754 | -1.317371 |
| 36 | H | 2.140658  | -3.959939 | -1.658202 |
| 37 | H | 1.285373  | -4.881607 | -2.914433 |
| 38 | H | -1.580602 | -3.463909 | -2.386321 |
| 39 | H | -0.815402 | -4.037939 | -3.877343 |
| 40 | H | -1.282571 | -2.343866 | -3.739596 |

**Table S114.2.3.** Gibbs Free Energies<sup>a</sup> and Equilibrium Populations<sup>b</sup> of Low-energy conformers of model (1R)-**8** in MeOH (PCM).

| Conformers | $\Delta G^a$ | $P$ (%) <sup>b</sup> |
|------------|--------------|----------------------|
| <b>A</b>   | 0.16         | 23.52                |
| <b>B</b>   | 0.06         | 27.71                |
| <b>C</b>   | 0.92         | 6.53                 |
| <b>D</b>   | 1.09         | 4.91                 |
| <b>E</b>   | 0.00         | 30.74                |
| <b>F</b>   | 0.91         | 6.59                 |

<sup>a</sup> B3LYP/6-311++G(2d,p), in kcal/mol. <sup>b</sup>From  $G$  values at 298.15K.

**Table S114.2.4.** Cartesian Coordinates, Relative Thermal Free Energies (B3LYP/6-311++G(2d,p) PCM/MeOH), and Equilibrium Populations of Low-energy Conformers of model **8** in MeOH (PCM).

| Conformation A             |   |                   |          |           |
|----------------------------|---|-------------------|----------|-----------|
| $\Delta G = 0.16$ kcal/mol |   | $P(\%) = 23.52\%$ |          |           |
| 1                          | C | 3.085911          | 2.458186 | -0.066079 |
| 2                          | C | 1.814968          | 2.416949 | 0.534081  |
| 3                          | C | 1.104700          | 1.214602 | 0.667251  |
| 4                          | C | 1.713598          | 0.031534 | 0.207037  |

|    |   |           |           |           |
|----|---|-----------|-----------|-----------|
| 5  | C | 3.000332  | 0.054540  | -0.374560 |
| 6  | C | 3.659080  | 1.288730  | -0.511053 |
| 7  | O | 1.015446  | -1.109790 | 0.375850  |
| 8  | C | 1.399664  | -2.315586 | -0.390156 |
| 9  | C | 2.923043  | -2.458250 | -0.355518 |
| 10 | C | 3.649259  | -1.197740 | -0.758057 |
| 11 | O | 4.746831  | -1.242045 | -1.317657 |
| 12 | C | 0.860081  | -2.168427 | -1.812823 |
| 13 | C | 0.722266  | -3.464634 | 0.341321  |
| 14 | C | -1.911470 | 0.906738  | -0.739901 |
| 15 | C | -1.416949 | 0.628195  | 0.523545  |
| 16 | C | -2.037385 | -0.340512 | 1.306152  |
| 17 | C | -3.145231 | -1.061782 | 0.860513  |
| 18 | C | -3.651704 | -0.815484 | -0.411408 |
| 19 | C | -3.017740 | 0.169627  | -1.199027 |
| 20 | O | -3.501040 | 0.398439  | -2.446734 |
| 21 | O | -1.345536 | 1.811820  | -1.613092 |
| 22 | C | -1.661612 | 3.200686  | -1.358576 |
| 23 | C | -4.834889 | -1.562818 | -0.962782 |
| 24 | O | 1.228338  | 3.550843  | 0.993515  |
| 25 | C | -0.264960 | 1.219900  | 1.299171  |
| 26 | O | -0.266323 | 0.433911  | 2.542716  |
| 27 | C | -1.299153 | -0.455428 | 2.560645  |
| 28 | O | -1.481854 | -1.180548 | 3.520984  |
| 29 | H | 3.601257  | 3.408545  | -0.161017 |
| 30 | H | 4.646224  | 1.305097  | -0.959191 |
| 31 | H | 3.245720  | -2.691053 | 0.667980  |
| 32 | H | 3.241638  | -3.285099 | -0.992957 |
| 33 | H | 1.304865  | -1.321562 | -2.341698 |
| 34 | H | 1.081833  | -3.072791 | -2.385323 |
| 35 | H | -0.223504 | -2.031846 | -1.795207 |
| 36 | H | -0.363052 | -3.338930 | 0.338778  |
| 37 | H | 0.956882  | -4.409897 | -0.154333 |
| 38 | H | 1.065782  | -3.524476 | 1.376798  |
| 39 | H | -3.603410 | -1.814458 | 1.493807  |
| 40 | H | -2.939130 | 1.056605  | -2.889159 |
| 41 | H | -1.169168 | 3.768956  | -2.146327 |
| 42 | H | -1.280923 | 3.513072  | -0.384769 |
| 43 | H | -2.741933 | 3.359709  | -1.404971 |
| 44 | H | -4.576233 | -2.099939 | -1.880870 |
| 45 | H | -5.204783 | -2.289140 | -0.237103 |
| 46 | H | -5.656370 | -0.884173 | -1.213797 |
| 47 | H | 1.804091  | 4.318573  | 0.863431  |

|    |   |           |          |          |
|----|---|-----------|----------|----------|
| 48 | H | -0.507544 | 2.237597 | 1.602601 |
|----|---|-----------|----------|----------|

Conformation B

$\Delta G = 0.06$  kcal/mol

P(%) = 27.71%

|    |   |           |           |           |
|----|---|-----------|-----------|-----------|
| 1  | C | 2.809359  | 2.702624  | 0.212790  |
| 2  | C | 1.564719  | 2.438265  | 0.810996  |
| 3  | C | 0.967621  | 1.171630  | 0.736123  |
| 4  | C | 1.649552  | 0.159632  | 0.035494  |
| 5  | C | 2.891816  | 0.414600  | -0.586477 |
| 6  | C | 3.453921  | 1.698240  | -0.473144 |
| 7  | O | 1.049033  | -1.046877 | -0.017833 |
| 8  | C | 1.860078  | -2.237071 | -0.352571 |
| 9  | C | 2.743020  | -1.903148 | -1.556645 |
| 10 | C | 3.536002  | -0.630157 | -1.380526 |
| 11 | O | 4.630485  | -0.479219 | -1.927735 |
| 12 | C | 0.840537  | -3.312787 | -0.694888 |
| 13 | C | 2.674471  | -2.619515 | 0.883187  |
| 14 | C | -2.083074 | 0.939440  | -0.584716 |
| 15 | C | -1.504961 | 0.427961  | 0.564970  |
| 16 | C | -2.004056 | -0.743289 | 1.125337  |
| 17 | C | -3.074104 | -1.439448 | 0.562645  |
| 18 | C | -3.661674 | -0.959877 | -0.603436 |
| 19 | C | -3.147207 | 0.227792  | -1.167362 |
| 20 | O | -3.708443 | 0.682204  | -2.317243 |
| 21 | O | -1.635781 | 2.069867  | -1.235794 |
| 22 | C | -2.089275 | 3.323296  | -0.672388 |
| 23 | C | -4.810403 | -1.665256 | -1.271070 |
| 24 | O | 0.900405  | 3.410461  | 1.484402  |
| 25 | C | -0.359495 | 0.927239  | 1.411401  |
| 26 | O | -0.236664 | -0.110076 | 2.445166  |
| 27 | C | -1.193460 | -1.069402 | 2.295410  |
| 28 | O | -1.266687 | -2.002898 | 3.072897  |
| 29 | H | 3.238565  | 3.696260  | 0.293968  |
| 30 | H | 4.407542  | 1.893249  | -0.950902 |
| 31 | H | 3.422423  | -2.729907 | -1.772673 |
| 32 | H | 2.112313  | -1.759133 | -2.443964 |
| 33 | H | 0.214011  | -3.004826 | -1.535528 |
| 34 | H | 1.354746  | -4.236899 | -0.970291 |
| 35 | H | 0.197461  | -3.524147 | 0.163052  |
| 36 | H | 2.010856  | -2.798423 | 1.732268  |
| 37 | H | 3.234428  | -3.537216 | 0.685623  |
| 38 | H | 3.392025  | -1.844534 | 1.164344  |
| 39 | H | -3.440316 | -2.351496 | 1.022305  |



|    |   |           |           |           |
|----|---|-----------|-----------|-----------|
| 40 | H | -3.219092 | 1.461259  | -2.631201 |
| 41 | H | -1.655975 | 4.105569  | -1.293886 |
| 42 | H | -1.742077 | 3.433079  | 0.356198  |
| 43 | H | -3.180144 | 3.383309  | -0.705274 |
| 44 | H | -4.559209 | -1.957852 | -2.295515 |
| 45 | H | -5.085105 | -2.565148 | -0.717878 |
| 46 | H | -5.693748 | -1.021572 | -1.333222 |
| 47 | H | 1.406681  | 4.235535  | 1.487413  |
| 48 | H | -0.654471 | 1.830577  | 1.943487  |

Conformation C

$\Delta G = 0.92$  kcal/mol

P(%) = 6.53%

|    |   |           |           |           |
|----|---|-----------|-----------|-----------|
| 1  | C | 2.811706  | 2.642876  | 0.608851  |
| 2  | C | 1.551774  | 2.314139  | 1.139329  |
| 3  | C | 0.957356  | 1.067357  | 0.897772  |
| 4  | C | 1.650392  | 0.148585  | 0.088811  |
| 5  | C | 2.913161  | 0.466709  | -0.456963 |
| 6  | C | 3.475212  | 1.723535  | -0.172184 |
| 7  | O | 1.038637  | -1.030701 | -0.144536 |
| 8  | C | 1.848778  | -2.184681 | -0.590142 |
| 9  | C | 2.795629  | -1.720988 | -1.700086 |
| 10 | C | 3.584868  | -0.484540 | -1.340696 |
| 11 | O | 4.702428  | -0.280689 | -1.819511 |
| 12 | C | 0.831321  | -3.187541 | -1.112096 |
| 13 | C | 2.595981  | -2.736761 | 0.623912  |
| 14 | C | -2.193600 | 1.129798  | -0.335457 |
| 15 | C | -1.545911 | 0.394117  | 0.643704  |
| 16 | C | -2.041582 | -0.851782 | 1.013325  |
| 17 | C | -3.175889 | -1.406616 | 0.421278  |
| 18 | C | -3.859142 | -0.682654 | -0.549746 |
| 19 | C | -3.364735 | 0.592603  | -0.901886 |
| 20 | O | -4.071548 | 1.310148  | -1.813121 |
| 21 | O | -1.799673 | 2.398325  | -0.710156 |
| 22 | C | -0.914525 | 2.459659  | -1.856409 |
| 23 | C | -5.106754 | -1.204870 | -1.208636 |
| 24 | O | 0.869060  | 3.197933  | 1.909370  |
| 25 | C | -0.371096 | 0.734735  | 1.529992  |
| 26 | O | -0.241036 | -0.458444 | 2.378574  |
| 27 | C | -1.197292 | -1.381372 | 2.080645  |
| 28 | O | -1.251320 | -2.440540 | 2.677931  |
| 29 | H | 3.241597  | 3.616315  | 0.821359  |
| 30 | H | 4.444610  | 1.967563  | -0.592138 |
| 31 | H | 3.481982  | -2.524529 | -1.973996 |

|    |   |           |           |           |
|----|---|-----------|-----------|-----------|
| 32 | H | 2.213933  | -1.470562 | -2.597352 |
| 33 | H | 0.248076  | -2.761252 | -1.931890 |
| 34 | H | 1.344706  | -4.078480 | -1.481979 |
| 35 | H | 0.147743  | -3.493589 | -0.316298 |
| 36 | H | 1.888859  | -3.006799 | 1.411732  |
| 37 | H | 3.150891  | -3.634000 | 0.337958  |
| 38 | H | 3.310890  | -2.019295 | 1.034588  |
| 39 | H | -3.534464 | -2.384221 | 0.726514  |
| 40 | H | -3.708259 | 2.207674  | -1.883487 |
| 41 | H | -0.735675 | 3.518220  | -2.038997 |
| 42 | H | -1.386303 | 2.006954  | -2.731993 |
| 43 | H | 0.027026  | 1.953152  | -1.639659 |
| 44 | H | -4.989355 | -1.269697 | -2.294993 |
| 45 | H | -5.353489 | -2.199693 | -0.833968 |
| 46 | H | -5.962392 | -0.548235 | -1.021442 |
| 47 | H | 1.374731  | 4.014166  | 2.034209  |
| 48 | H | -0.651412 | 1.544208  | 2.203520  |

Conformation D

$\Delta G = 1.09$  kcal/mol

P(%) = 4.91%

|    |   |           |           |           |
|----|---|-----------|-----------|-----------|
| 1  | C | 2.963435  | 2.549866  | 0.316455  |
| 2  | C | 1.688020  | 2.372645  | 0.881445  |
| 3  | C | 1.044954  | 1.126986  | 0.863911  |
| 4  | C | 1.713245  | 0.043906  | 0.261980  |
| 5  | C | 3.006268  | 0.200672  | -0.283989 |
| 6  | C | 3.604152  | 1.472712  | -0.252464 |
| 7  | O | 1.062815  | -1.137252 | 0.259260  |
| 8  | C | 1.520620  | -2.218503 | -0.640027 |
| 9  | C | 3.048293  | -2.295015 | -0.585688 |
| 10 | C | 3.721469  | -0.961984 | -0.806247 |
| 11 | O | 4.830093  | -0.885041 | -1.339787 |
| 12 | C | 1.000974  | -1.920809 | -2.046629 |
| 13 | C | 0.885124  | -3.479728 | -0.073800 |
| 14 | C | -2.059347 | 1.123514  | -0.488383 |
| 15 | C | -1.484324 | 0.545754  | 0.631992  |
| 16 | C | -2.064516 | -0.583257 | 1.201081  |
| 17 | C | -3.210145 | -1.177719 | 0.672689  |
| 18 | C | -3.816510 | -0.613623 | -0.444324 |
| 19 | C | -3.236800 | 0.547392  | -1.001054 |
| 20 | O | -3.864775 | 1.118392  | -2.061317 |
| 21 | O | -1.591856 | 2.286869  | -1.065253 |
| 22 | C | -0.651779 | 2.110223  | -2.154002 |
| 23 | C | -5.069120 | -1.185616 | -1.050452 |

|    |   |           |           |           |
|----|---|-----------|-----------|-----------|
| 24 | O | 1.030552  | 3.414306  | 1.450672  |
| 25 | C | -0.319483 | 0.980757  | 1.490073  |
| 26 | O | -0.285689 | -0.042623 | 2.544142  |
| 27 | C | -1.289914 | -0.949107 | 2.383637  |
| 28 | O | -1.432033 | -1.869002 | 3.167612  |
| 29 | H | 3.428737  | 3.529862  | 0.345300  |
| 30 | H | 4.596166  | 1.591735  | -0.673685 |
| 31 | H | 3.362307  | -2.644323 | 0.406860  |
| 32 | H | 3.417917  | -3.017585 | -1.315613 |
| 33 | H | 1.423298  | -1.002805 | -2.462880 |
| 34 | H | 1.265848  | -2.742753 | -2.716780 |
| 35 | H | -0.087180 | -1.825725 | -2.036213 |
| 36 | H | -0.204852 | -3.405684 | -0.090387 |
| 37 | H | 1.176934  | -4.344670 | -0.674594 |
| 38 | H | 1.208721  | -3.650871 | 0.955613  |
| 39 | H | -3.636106 | -2.060611 | 1.137755  |
| 40 | H | -3.440370 | 1.963974  | -2.279497 |
| 41 | H | -0.430743 | 3.111095  | -2.521836 |
| 42 | H | -1.095691 | 1.511164  | -2.952863 |
| 43 | H | 0.261210  | 1.633335  | -1.795766 |
| 44 | H | -4.917082 | -1.462680 | -2.098463 |
| 45 | H | -5.388783 | -2.076282 | -0.506636 |
| 46 | H | -5.889661 | -0.461321 | -1.030274 |
| 47 | H | 1.562918  | 4.222359  | 1.414931  |
| 48 | H | -0.574126 | 1.912182  | 1.995178  |

Conformation E

$\Delta G = 0.00$  kcal/mol  $P(\%) = 30.74\%$

|    |   |           |           |           |
|----|---|-----------|-----------|-----------|
| 1  | C | -1.322099 | -1.744344 | 2.435068  |
| 2  | C | -0.350528 | -1.547215 | 1.439668  |
| 3  | C | -0.619893 | -0.792430 | 0.288107  |
| 4  | C | -1.903089 | -0.231133 | 0.149833  |
| 5  | C | -2.881510 | -0.397603 | 1.156043  |
| 6  | C | -2.564799 | -1.170095 | 2.286249  |
| 7  | O | -2.141621 | 0.488764  | -0.969499 |
| 8  | C | -3.540666 | 0.732083  | -1.381295 |
| 9  | C | -4.336081 | 1.186486  | -0.155795 |
| 10 | C | -4.177087 | 0.268658  | 1.032855  |
| 11 | O | -5.076384 | 0.145865  | 1.867246  |
| 12 | C | -4.091781 | -0.555630 | -1.993239 |
| 13 | C | -3.444855 | 1.837691  | -2.421782 |
| 14 | C | 2.107150  | 1.125631  | 0.267680  |
| 15 | C | 1.757099  | -0.036501 | -0.399523 |

|    |   |           |           |           |
|----|---|-----------|-----------|-----------|
| 16 | C | 2.752314  | -0.909038 | -0.829153 |
| 17 | C | 4.106826  | -0.662742 | -0.604251 |
| 18 | C | 4.486109  | 0.488026  | 0.078998  |
| 19 | C | 3.471188  | 1.368462  | 0.511794  |
| 20 | O | 3.841230  | 2.482923  | 1.192949  |
| 21 | O | 1.201771  | 2.032641  | 0.776033  |
| 22 | C | 0.621747  | 2.936668  | -0.193116 |
| 23 | C | 5.926631  | 0.812308  | 0.366239  |
| 24 | O | 0.882913  | -2.093078 | 1.550174  |
| 25 | C | 0.411415  | -0.595146 | -0.794376 |
| 26 | O | 0.759425  | -1.882762 | -1.416226 |
| 27 | C | 2.110388  | -2.060089 | -1.457579 |
| 28 | O | 2.593404  | -3.058386 | -1.959117 |
| 29 | H | -1.077618 | -2.340749 | 3.308442  |
| 30 | H | -3.318165 | -1.301021 | 3.054955  |
| 31 | H | -3.983922 | 2.176346  | 0.163851  |
| 32 | H | -5.395044 | 1.283659  | -0.402577 |
| 33 | H | -4.133817 | -1.375863 | -1.272339 |
| 34 | H | -5.106295 | -0.382951 | -2.361611 |
| 35 | H | -3.471120 | -0.869803 | -2.835747 |
| 36 | H | -2.845188 | 1.513454  | -3.276203 |
| 37 | H | -4.443032 | 2.094209  | -2.784903 |
| 38 | H | -2.992711 | 2.737106  | -1.996832 |
| 39 | H | 4.858706  | -1.365113 | -0.948893 |
| 40 | H | 3.046359  | 2.970112  | 1.468930  |
| 41 | H | 0.035398  | 2.388055  | -0.931898 |
| 42 | H | 1.404829  | 3.513597  | -0.691523 |
| 43 | H | -0.028418 | 3.603650  | 0.371176  |
| 44 | H | 6.110236  | 0.898399  | 1.441961  |
| 45 | H | 6.583672  | 0.035990  | -0.029503 |
| 46 | H | 6.219196  | 1.767097  | -0.082315 |
| 47 | H | 0.965541  | -2.601164 | 2.370481  |
| 48 | H | -0.025384 | 0.002968  | -1.592487 |

Conformation F

$\Delta G = 0.91$  kcal/mol

P(%) = 6.59%

|   |   |          |           |           |
|---|---|----------|-----------|-----------|
| 1 | C | 1.475630 | -2.063343 | -2.127928 |
| 2 | C | 0.446235 | -1.806404 | -1.207095 |
| 3 | C | 0.653948 | -0.997434 | -0.080272 |
| 4 | C | 1.934438 | -0.448085 | 0.114275  |
| 5 | C | 2.983496 | -0.708381 | -0.796100 |
| 6 | C | 2.721306 | -1.515193 | -1.916415 |
| 7 | O | 2.110819 | 0.319644  | 1.212567  |

|    |   |           |           |           |
|----|---|-----------|-----------|-----------|
| 8  | C | 3.252404  | 1.256356  | 1.259547  |
| 9  | C | 4.508235  | 0.519010  | 0.789106  |
| 10 | C | 4.324840  | -0.188769 | -0.532289 |
| 11 | O | 5.272449  | -0.357271 | -1.302447 |
| 12 | C | 3.357581  | 1.654114  | 2.723955  |
| 13 | C | 2.917036  | 2.461326  | 0.380726  |
| 14 | C | -1.963707 | 1.146409  | -0.188096 |
| 15 | C | -1.726375 | -0.074417 | 0.423095  |
| 16 | C | -2.797540 | -0.892159 | 0.769562  |
| 17 | C | -4.120589 | -0.536847 | 0.508573  |
| 18 | C | -4.390067 | 0.687142  | -0.093896 |
| 19 | C | -3.299910 | 1.523415  | -0.419660 |
| 20 | O | -3.578133 | 2.736173  | -0.963560 |
| 21 | O | -0.966492 | 2.050309  | -0.493141 |
| 22 | C | -0.428584 | 1.958517  | -1.835077 |
| 23 | C | -5.793202 | 1.146861  | -0.381212 |
| 24 | O | -0.792417 | -2.325935 | -1.376982 |
| 25 | C | -0.446850 | -0.713438 | 0.910500  |
| 26 | O | -0.914933 | -1.971691 | 1.511051  |
| 27 | C | -2.270287 | -2.082381 | 1.431013  |
| 28 | O | -2.844909 | -3.056474 | 1.880695  |
| 29 | H | 1.275559  | -2.693762 | -2.988468 |
| 30 | H | 3.526584  | -1.713805 | -2.614724 |
| 31 | H | 5.352523  | 1.207748  | 0.720658  |
| 32 | H | 4.775960  | -0.252636 | 1.523057  |
| 33 | H | 3.532051  | 0.779087  | 3.354791  |
| 34 | H | 4.189331  | 2.349130  | 2.862666  |
| 35 | H | 2.441378  | 2.148857  | 3.056440  |
| 36 | H | 1.988029  | 2.927078  | 0.716991  |
| 37 | H | 3.717893  | 3.201873  | 0.452081  |
| 38 | H | 2.806953  | 2.190542  | -0.672092 |
| 39 | H | -4.934145 | -1.198688 | 0.786851  |
| 40 | H | -2.765448 | 3.263159  | -1.028622 |
| 41 | H | -1.228144 | 2.037746  | -2.575977 |
| 42 | H | 0.106777  | 1.017946  | -1.969036 |
| 43 | H | 0.255161  | 2.798851  | -1.942073 |
| 44 | H | -5.942291 | 1.336544  | -1.448952 |
| 45 | H | -6.517574 | 0.394268  | -0.065348 |
| 46 | H | -6.022585 | 2.081122  | 0.141138  |
| 47 | H | -0.838889 | -2.863669 | -2.181272 |
| 48 | H | -0.038429 | -0.127216 | 1.732565  |

**Table S114.2.5.** Gibbs Free Energies<sup>a</sup> and Equilibrium Populations<sup>b</sup> of Low energy conformers of model (4*S*,5*S*)-**9** in MeOH (PCM).

| Conformers | $\Delta G^a$ | $P$ (%) <sup>b</sup> |
|------------|--------------|----------------------|
| <b>A</b>   | 0.88         | 6.85                 |
| <b>B</b>   | 0.00         | 30.34                |
| <b>C</b>   | 0.33         | 17.41                |
| <b>D</b>   | 0.04         | 28.20                |
| <b>E</b>   | 0.34         | 17.20                |

<sup>a</sup> B3LYP/6-311++G(2d,p), in kcal/mol. <sup>b</sup>From  $G$  values at 298.15K.

**Table S114.2.6.** Cartesian Coordinates, Relative Thermal Free Energies (B3LYP/6-311++G(2d,p) PCM/MeOH), and Equilibrium Populations of Low energy Conformers of model **9** in MeOH (PCM).

| Conformation A             |   |                  |           |           |
|----------------------------|---|------------------|-----------|-----------|
| $\Delta G = 0.88$ kcal/mol |   | $P(\%) = 6.85\%$ |           |           |
| 1                          | C | 3.061722         | -1.031467 | -1.488335 |
| 2                          | C | 4.254332         | -0.235561 | -0.917256 |
| 3                          | C | 4.074207         | 0.034717  | 0.585900  |
| 4                          | C | 2.730601         | 0.664078  | 0.812127  |
| 5                          | C | 1.589662         | 0.393343  | -0.028927 |
| 6                          | C | 1.696550         | -0.419982 | -1.241074 |
| 7                          | O | 0.757908         | -0.608625 | -2.012779 |
| 8                          | C | 2.310453         | 1.541865  | 1.751175  |
| 9                          | O | 0.978537         | 1.828106  | 1.562518  |
| 10                         | C | 0.537302         | 1.122697  | 0.475257  |
| 11                         | C | -0.861700        | 1.319047  | 0.092154  |
| 12                         | C | -1.747410        | 0.220735  | 0.008507  |
| 13                         | C | -3.089226        | 0.407154  | -0.382259 |
| 14                         | C | -3.543228        | 1.711653  | -0.649859 |
| 15                         | C | -2.705773        | 2.798938  | -0.550482 |
| 16                         | C | -1.365245        | 2.604840  | -0.181371 |
| 17                         | O | -1.241808        | -0.986358 | 0.322007  |
| 18                         | C | -2.167632        | -2.097283 | 0.636515  |
| 19                         | C | -3.299544        | -2.099377 | -0.393172 |
| 20                         | C | -3.964525        | -0.752750 | -0.547690 |
| 21                         | O | -5.155311        | -0.656555 | -0.849919 |
| 22                         | C | 5.583782         | -0.920646 | -1.236285 |
| 23                         | O | 4.178261         | -1.224272 | 1.287288  |
| 24                         | C | -2.674860        | -1.900778 | 2.065018  |
| 25                         | C | -1.310946        | -3.349018 | 0.523376  |
| 26                         | O | -0.599549        | 3.721461  | -0.124386 |
| 27                         | H | 3.175462         | -1.180275 | -2.565031 |
| 28                         | H | 3.037246         | -2.032875 | -1.037233 |

|    |   |           |           |           |
|----|---|-----------|-----------|-----------|
| 29 | H | 4.258058  | 0.751987  | -1.394426 |
| 30 | H | 4.868930  | 0.700231  | 0.937931  |
| 31 | H | 2.782455  | 2.047088  | 2.579071  |
| 32 | H | -4.576293 | 1.849257  | -0.948823 |
| 33 | H | -3.050123 | 3.804817  | -0.761059 |
| 34 | H | -2.896119 | -2.364868 | -1.379316 |
| 35 | H | -4.047953 | -2.850469 | -0.133997 |
| 36 | H | 5.628930  | -1.931056 | -0.821934 |
| 37 | H | 6.426159  | -0.351549 | -0.830491 |
| 38 | H | 5.725976  | -0.997562 | -2.318283 |
| 39 | H | 4.076404  | -1.061600 | 2.234652  |
| 40 | H | -3.256837 | -0.982724 | 2.178530  |
| 41 | H | -3.316789 | -2.739702 | 2.345897  |
| 42 | H | -1.834967 | -1.864134 | 2.762817  |
| 43 | H | -0.482836 | -3.314781 | 1.235831  |
| 44 | H | -1.913743 | -4.233377 | 0.743903  |
| 45 | H | -0.902313 | -3.453025 | -0.484448 |
| 46 | H | 0.302910  | 3.541337  | 0.178646  |

Conformation B

$\Delta G = 0.00$  kcal/mol

P(%) = 30.34%

|    |   |           |           |           |
|----|---|-----------|-----------|-----------|
| 1  | C | -3.944292 | 0.786662  | -1.158258 |
| 2  | C | -4.329033 | -0.691885 | -0.960676 |
| 3  | C | -3.974329 | -1.173510 | 0.456162  |
| 4  | C | -2.523135 | -0.890984 | 0.706694  |
| 5  | C | -1.845433 | 0.248603  | 0.135750  |
| 6  | C | -2.547896 | 1.177687  | -0.729215 |
| 7  | O | -2.070198 | 2.269950  | -1.071911 |
| 8  | C | -1.594167 | -1.561954 | 1.420839  |
| 9  | O | -0.382760 | -0.923710 | 1.329096  |
| 10 | C | -0.520169 | 0.176147  | 0.535414  |
| 11 | C | 0.714801  | 0.928583  | 0.292245  |
| 12 | C | 1.905785  | 0.228409  | -0.036341 |
| 13 | C | 3.144309  | 0.895405  | -0.098389 |
| 14 | C | 3.191008  | 2.272474  | 0.185144  |
| 15 | C | 2.044016  | 2.982138  | 0.455033  |
| 16 | C | 0.801958  | 2.326332  | 0.472875  |
| 17 | O | 1.780134  | -1.083358 | -0.319350 |
| 18 | C | 2.975553  | -1.952058 | -0.272143 |
| 19 | C | 4.121780  | -1.244944 | -0.998292 |
| 20 | C | 4.344485  | 0.168730  | -0.518610 |
| 21 | O | 5.463012  | 0.683844  | -0.539935 |
| 22 | C | -5.795794 | -0.935452 | -1.318533 |

|    |   |           |           |           |
|----|---|-----------|-----------|-----------|
| 23 | O | -4.813889 | -0.473205 | 1.399518  |
| 24 | C | 2.554409  | -3.218314 | -1.002020 |
| 25 | C | 3.299767  | -2.238776 | 1.194013  |
| 26 | O | -0.286238 | 3.089713  | 0.723540  |
| 27 | H | -4.063973 | 1.081919  | -2.204926 |
| 28 | H | -4.623772 | 1.433137  | -0.586931 |
| 29 | H | -3.709742 | -1.294433 | -1.635802 |
| 30 | H | -4.168210 | -2.247558 | 0.539274  |
| 31 | H | -1.604090 | -2.458531 | 2.020484  |
| 32 | H | 4.148884  | 2.778922  | 0.147939  |
| 33 | H | 2.065951  | 4.051035  | 0.633238  |
| 34 | H | 5.047036  | -1.815560 | -0.899231 |
| 35 | H | 3.890637  | -1.178730 | -2.069806 |
| 36 | H | -6.469213 | -0.337990 | -0.698464 |
| 37 | H | -6.061603 | -1.989035 | -1.187636 |
| 38 | H | -5.984887 | -0.672735 | -2.363592 |
| 39 | H | -4.607547 | -0.787734 | 2.289962  |
| 40 | H | 2.262005  | -2.996759 | -2.031353 |
| 41 | H | 3.386042  | -3.926723 | -1.025765 |
| 42 | H | 1.713466  | -3.696935 | -0.493733 |
| 43 | H | 2.443557  | -2.704154 | 1.687507  |
| 44 | H | 4.146244  | -2.927646 | 1.254751  |
| 45 | H | 3.566104  | -1.334401 | 1.747104  |
| 46 | H | -1.039115 | 2.818281  | 0.139154  |

Conformation C

$\Delta G = 0.33$  kcal/mol

P(%) = 17.41%

|    |   |           |           |           |
|----|---|-----------|-----------|-----------|
| 1  | C | 3.944175  | 0.787253  | -1.122911 |
| 2  | C | 4.713034  | 0.051859  | -0.000965 |
| 3  | C | 3.956167  | -1.205563 | 0.455385  |
| 4  | C | 2.520927  | -0.859126 | 0.736904  |
| 5  | C | 1.840932  | 0.264238  | 0.135163  |
| 6  | C | 2.553984  | 1.203924  | -0.713876 |
| 7  | O | 2.078015  | 2.295960  | -1.056002 |
| 8  | C | 1.597925  | -1.492917 | 1.493541  |
| 9  | O | 0.387772  | -0.856806 | 1.388289  |
| 10 | C | 0.521453  | 0.213013  | 0.553521  |
| 11 | C | -0.715838 | 0.960370  | 0.299522  |
| 12 | C | -1.899688 | 0.249598  | -0.029122 |
| 13 | C | -3.142128 | 0.907981  | -0.106167 |
| 14 | C | -3.198898 | 2.287492  | 0.163261  |
| 15 | C | -2.057956 | 3.006693  | 0.434232  |
| 16 | C | -0.812432 | 2.358102  | 0.467103  |



|    |   |           |           |           |
|----|---|-----------|-----------|-----------|
| 17 | O | -1.762681 | -1.064644 | -0.296078 |
| 18 | C | -2.952902 | -1.940491 | -0.251770 |
| 19 | C | -4.097981 | -1.247141 | -0.993041 |
| 20 | C | -4.334404 | 0.168903  | -0.527005 |
| 21 | O | -5.456636 | 0.675370  | -0.559701 |
| 22 | C | 6.154863  | -0.242820 | -0.415041 |
| 23 | O | 4.041482  | -2.192739 | -0.596750 |
| 24 | C | -3.287622 | -2.216819 | 1.213961  |
| 25 | C | -2.517471 | -3.209823 | -0.967889 |
| 26 | O | 0.270600  | 3.129702  | 0.718408  |
| 27 | H | 4.487555  | 1.676355  | -1.449394 |
| 28 | H | 3.847006  | 0.128320  | -1.995898 |
| 29 | H | 4.739197  | 0.714018  | 0.873061  |
| 30 | H | 4.431717  | -1.611896 | 1.353860  |
| 31 | H | 1.614362  | -2.358613 | 2.137069  |
| 32 | H | -4.159349 | 2.788042  | 0.114532  |
| 33 | H | -2.087530 | 4.077108  | 0.601993  |
| 34 | H | -3.858646 | -1.188105 | -2.063178 |
| 35 | H | -5.019988 | -1.823438 | -0.896694 |
| 36 | H | 6.201537  | -0.850278 | -1.322371 |
| 37 | H | 6.687889  | -0.777691 | 0.377285  |
| 38 | H | 6.694921  | 0.688459  | -0.608838 |
| 39 | H | 3.574348  | -2.989390 | -0.311237 |
| 40 | H | -3.565512 | -1.309432 | 1.756391  |
| 41 | H | -4.129474 | -2.911446 | 1.273637  |
| 42 | H | -2.432201 | -2.671280 | 1.718896  |
| 43 | H | -1.677605 | -3.678661 | -0.448811 |
| 44 | H | -3.344149 | -3.923995 | -0.992853 |
| 45 | H | -2.217887 | -2.994450 | -1.996452 |
| 46 | H | 1.028544  | 2.853272  | 0.144852  |

Conformation D

$\Delta G = 0.04$  kcal/mol

P(%) = 28.20%

|    |   |          |           |           |
|----|---|----------|-----------|-----------|
| 1  | C | 3.869988 | 0.652902  | 1.258876  |
| 2  | C | 4.275715 | -0.784970 | 0.885000  |
| 3  | C | 3.984365 | -1.076092 | -0.596825 |
| 4  | C | 2.543208 | -0.762910 | -0.871557 |
| 5  | C | 1.829355 | 0.282639  | -0.177796 |
| 6  | C | 2.483964 | 1.085763  | 0.837696  |
| 7  | O | 1.975697 | 2.111345  | 1.315905  |
| 8  | C | 1.653582 | -1.330827 | -1.713918 |
| 9  | O | 0.433116 | -0.716903 | -1.587995 |
| 10 | C | 0.523032 | 0.260887  | -0.642356 |

|    |   |           |           |           |
|----|---|-----------|-----------|-----------|
| 11 | C | -0.734603 | 0.953942  | -0.347680 |
| 12 | C | -1.924052 | 0.192082  | -0.180202 |
| 13 | C | -3.178881 | 0.823549  | -0.078656 |
| 14 | C | -3.239332 | 2.228649  | -0.100360 |
| 15 | C | -2.096826 | 2.987459  | -0.197244 |
| 16 | C | -0.844174 | 2.360049  | -0.300784 |
| 17 | O | -1.785596 | -1.147071 | -0.121135 |
| 18 | C | -2.881181 | -1.965553 | 0.443340  |
| 19 | C | -4.208367 | -1.475316 | -0.137291 |
| 20 | C | -4.398394 | 0.015642  | -0.003763 |
| 21 | O | -5.521018 | 0.511056  | 0.101651  |
| 22 | C | 5.728698  | -1.068681 | 1.268154  |
| 23 | O | 4.861107  | -0.259916 | -1.403023 |
| 24 | C | -2.828028 | -1.847340 | 1.966392  |
| 25 | C | -2.566890 | -3.383222 | -0.010278 |
| 26 | O | 0.234759  | 3.172727  | -0.394036 |
| 27 | H | 3.953488  | 0.811617  | 2.338073  |
| 28 | H | 4.560357  | 1.371738  | 0.797581  |
| 29 | H | 3.634474  | -1.473191 | 1.448533  |
| 30 | H | 4.186449  | -2.130179 | -0.811465 |
| 31 | H | 1.698697  | -2.135252 | -2.431303 |
| 32 | H | -4.208501 | 2.708778  | -0.026137 |
| 33 | H | -2.131520 | 4.070732  | -0.188309 |
| 34 | H | -4.246195 | -1.701803 | -1.211248 |
| 35 | H | -5.045230 | -1.994623 | 0.333414  |
| 36 | H | 6.421617  | -0.393661 | 0.759311  |
| 37 | H | 6.008587  | -2.095406 | 1.012524  |
| 38 | H | 5.873286  | -0.943841 | 2.345422  |
| 39 | H | 4.716321  | -0.476612 | -2.333850 |
| 40 | H | -3.015618 | -0.828205 | 2.313820  |
| 41 | H | -3.586713 | -2.496205 | 2.411397  |
| 42 | H | -1.849312 | -2.161563 | 2.336663  |
| 43 | H | -1.599483 | -3.708663 | 0.380659  |
| 44 | H | -3.332208 | -4.070193 | 0.359081  |
| 45 | H | -2.543841 | -3.448296 | -1.100758 |
| 46 | H | 0.973770  | 2.833012  | 0.171170  |

Conformation E

$\Delta G = 0.34$  kcal/mol

P(%) = 17.20%

|   |   |           |           |           |
|---|---|-----------|-----------|-----------|
| 1 | C | -3.885868 | 0.685404  | 1.198746  |
| 2 | C | -4.697764 | 0.084552  | 0.028126  |
| 3 | C | -3.969710 | -1.121860 | -0.584347 |
| 4 | C | -2.541591 | -0.756363 | -0.876679 |

|    |   |           |           |           |
|----|---|-----------|-----------|-----------|
| 5  | C | -1.827645 | 0.286330  | -0.177251 |
| 6  | C | -2.499460 | 1.125947  | 0.800690  |
| 7  | O | -1.993733 | 2.159304  | 1.262140  |
| 8  | C | -1.654473 | -1.307547 | -1.734000 |
| 9  | O | -0.434631 | -0.696076 | -1.603125 |
| 10 | C | -0.524141 | 0.273441  | -0.648583 |
| 11 | C | 0.733853  | 0.972009  | -0.362872 |
| 12 | C | 1.921255  | 0.210666  | -0.183822 |
| 13 | C | 3.177433  | 0.840985  | -0.091136 |
| 14 | C | 3.240739  | 2.245506  | -0.133744 |
| 15 | C | 2.099785  | 3.004821  | -0.243355 |
| 16 | C | 0.846344  | 2.377729  | -0.339172 |
| 17 | O | 1.779799  | -1.127505 | -0.106705 |
| 18 | C | 2.872686  | -1.938444 | 0.474218  |
| 19 | C | 4.201768  | -1.460914 | -0.112484 |
| 20 | C | 4.395149  | 0.031732  | -0.003680 |
| 21 | O | 5.518905  | 0.526153  | 0.093648  |
| 22 | C | -6.128871 | -0.242674 | 0.454257  |
| 23 | O | -4.029374 | -2.213938 | 0.360206  |
| 24 | C | 2.556725  | -3.363233 | 0.045078  |
| 25 | C | 2.816868  | -1.793501 | 1.994836  |
| 26 | O | -0.231331 | 3.190583  | -0.447624 |
| 27 | H | -4.404911 | 1.541524  | 1.634838  |
| 28 | H | -3.776064 | -0.063318 | 1.994635  |
| 29 | H | -4.742651 | 0.838180  | -0.767368 |
| 30 | H | -4.478936 | -1.427307 | -1.503959 |
| 31 | H | -1.704472 | -2.094979 | -2.469789 |
| 32 | H | 4.210752  | 2.724847  | -0.066096 |
| 33 | H | 2.136184  | 4.088065  | -0.251170 |
| 34 | H | 5.036772  | -1.973950 | 0.368296  |
| 35 | H | 4.241019  | -1.705521 | -1.182376 |
| 36 | H | -6.152252 | -0.951148 | 1.285953  |
| 37 | H | -6.694620 | -0.677247 | -0.375827 |
| 38 | H | -6.650300 | 0.664368  | 0.773257  |
| 39 | H | -3.583498 | -2.980072 | -0.024918 |
| 40 | H | 2.536724  | -3.447743 | -1.044116 |
| 41 | H | 3.319663  | -4.044884 | 0.428855  |
| 42 | H | 1.587678  | -3.679658 | 0.439220  |
| 43 | H | 1.837032  | -2.100081 | 2.368471  |
| 44 | H | 3.573881  | -2.435472 | 2.452457  |
| 45 | H | 3.004933  | -0.768803 | 2.325207  |
| 46 | H | -0.972514 | 2.857514  | 0.117153  |

**Table S114.2.7.** Gibbs Free Energies<sup>a</sup> and Equilibrium Populations<sup>b</sup> of Low energy conformers of model (5*R*,9*S*)-**10** in MeOH (PCM).

| Conformers | $\Delta G^a$ | $P$ (%) <sup>b</sup> |
|------------|--------------|----------------------|
| <b>A</b>   | 0.00         | 81.19                |
| <b>B</b>   | 2.67         | 0.90                 |
| <b>C</b>   | 2.37         | 1.47                 |
| <b>D</b>   | 0.95         | 16.43                |

<sup>a</sup>B3LYP/6-311++G(2d,p), in kcal/mol. <sup>b</sup>From  $G$  values at 298.15K.

**Table S114.2.8.** Cartesian Coordinates, Relative Thermal Free Energies (B3LYP/6-311++G(2d,p) PCM/MeOH), and Equilibrium Populations of Low energy Conformers of model **10** in MeOH (PCM).

| Conformation A             |   |           |                   |           |
|----------------------------|---|-----------|-------------------|-----------|
| $\Delta G = 0.00$ kcal/mol |   |           | $P(\%) = 81.19\%$ |           |
| 1                          | C | -1.796824 | 0.412465          | 0.195267  |
| 2                          | C | -2.270312 | 1.716078          | 0.327616  |
| 3                          | C | -3.585086 | 1.979125          | -0.061998 |
| 4                          | C | -4.405648 | 0.969761          | -0.571219 |
| 5                          | C | -3.914843 | -0.331789         | -0.696255 |
| 6                          | C | -2.605308 | -0.599987         | -0.305968 |
| 7                          | C | -0.431189 | -0.156979         | 0.530402  |
| 8                          | C | 0.043954  | 0.095654          | 1.964960  |
| 9                          | C | -0.937309 | -0.343480         | 3.051381  |
| 10                         | C | 0.624698  | 0.270201          | -0.534190 |
| 11                         | C | 2.033675  | -0.248419         | -0.379347 |
| 12                         | C | 2.905031  | 0.838266          | -0.346970 |
| 13                         | C | 4.288481  | 0.703030          | -0.277715 |
| 14                         | C | 4.793351  | -0.595071         | -0.246289 |
| 15                         | C | 3.937841  | -1.699631         | -0.270272 |
| 16                         | C | 2.547423  | -1.547345         | -0.329377 |
| 17                         | O | 0.790237  | 1.715125          | -0.518553 |
| 18                         | O | 1.772744  | -2.665028         | -0.340076 |
| 19                         | C | 2.102311  | 2.064966          | -0.420015 |
| 20                         | O | 2.442445  | 3.229774          | -0.406634 |
| 21                         | O | -0.607117 | -1.592281         | 0.328815  |
| 22                         | C | -1.861775 | -1.897306         | -0.332316 |
| 23                         | O | -4.659992 | -1.373808         | -1.183873 |
| 24                         | H | -1.645608 | 2.507729          | 0.724058  |
| 25                         | H | -3.983366 | 2.984274          | 0.032430  |
| 26                         | H | -5.427811 | 1.187175          | -0.867600 |
| 27                         | H | 0.256679  | 1.165056          | 2.063286  |
| 28                         | H | 0.997490  | -0.423597         | 2.102439  |
| 29                         | H | -0.503633 | -0.160652         | 4.038782  |

|    |   |           |           |           |
|----|---|-----------|-----------|-----------|
| 30 | H | -1.162865 | -1.411227 | 2.984977  |
| 31 | H | -1.881376 | 0.205288  | 3.000447  |
| 32 | H | 0.222896  | 0.013008  | -1.518466 |
| 33 | H | 4.938859  | 1.569995  | -0.257054 |
| 34 | H | 5.864430  | -0.760188 | -0.198180 |
| 35 | H | 4.343523  | -2.705647 | -0.236657 |
| 36 | H | 0.832861  | -2.423093 | -0.167090 |
| 37 | H | -2.352054 | -2.698195 | 0.227397  |
| 38 | H | -1.661258 | -2.255469 | -1.348044 |
| 39 | H | -5.556117 | -1.081948 | -1.404311 |

Conformation B

$\Delta G = 2.67$  kcal/mol

P(%) = 0.90%

|    |   |           |           |           |
|----|---|-----------|-----------|-----------|
| 1  | C | -1.854599 | 0.359394  | 0.235742  |
| 2  | C | -2.312742 | 1.676706  | 0.195886  |
| 3  | C | -3.637211 | 1.904273  | -0.183440 |
| 4  | C | -4.487123 | 0.850148  | -0.522923 |
| 5  | C | -4.011505 | -0.461980 | -0.493626 |
| 6  | C | -2.692170 | -0.694952 | -0.114299 |
| 7  | C | -0.483135 | -0.190136 | 0.595358  |
| 8  | C | -0.016920 | 0.068150  | 2.040965  |
| 9  | C | 0.289343  | 1.502426  | 2.478359  |
| 10 | C | 0.552829  | 0.120654  | -0.526685 |
| 11 | C | 1.968339  | -0.373204 | -0.348649 |
| 12 | C | 2.834990  | 0.707741  | -0.500686 |
| 13 | C | 4.220688  | 0.585654  | -0.459348 |
| 14 | C | 4.734098  | -0.693744 | -0.258983 |
| 15 | C | 3.884880  | -1.792193 | -0.104147 |
| 16 | C | 2.492191  | -1.653544 | -0.143895 |
| 17 | O | 0.711419  | 1.554993  | -0.710095 |
| 18 | O | 1.730286  | -2.769739 | 0.008804  |
| 19 | C | 2.024638  | 1.911090  | -0.724141 |
| 20 | O | 2.360765  | 3.063757  | -0.901581 |
| 21 | O | -0.669982 | -1.640273 | 0.502934  |
| 22 | C | -1.965004 | -1.997571 | -0.036879 |
| 23 | O | -4.779014 | -1.548326 | -0.824626 |
| 24 | H | -1.668073 | 2.510887  | 0.438433  |
| 25 | H | -4.017287 | 2.920199  | -0.219075 |
| 26 | H | -5.515718 | 1.041790  | -0.814929 |
| 27 | H | 0.865771  | -0.557274 | 2.209654  |
| 28 | H | -0.804682 | -0.339223 | 2.682365  |
| 29 | H | 0.567109  | 1.494077  | 3.536632  |
| 30 | H | -0.573796 | 2.163592  | 2.378860  |

|    |   |           |           |           |
|----|---|-----------|-----------|-----------|
| 31 | H | 1.122469  | 1.947615  | 1.931938  |
| 32 | H | 0.128580  | -0.261337 | -1.459724 |
| 33 | H | 4.866044  | 1.447626  | -0.583727 |
| 34 | H | 5.807061  | -0.848846 | -0.220618 |
| 35 | H | 4.297620  | -2.783482 | 0.053480  |
| 36 | H | 0.784603  | -2.523781 | 0.133321  |
| 37 | H | -2.427423 | -2.722306 | 0.639077  |
| 38 | H | -1.834034 | -2.471856 | -1.015696 |
| 39 | H | -5.675565 | -1.274437 | -1.065136 |

Conformation C

$\Delta G = 2.37$  kcal/mol

P(%) = 1.47%

|    |   |           |           |           |
|----|---|-----------|-----------|-----------|
| 1  | C | -1.901344 | 0.434241  | 0.270204  |
| 2  | C | -2.386614 | 1.739215  | 0.331906  |
| 3  | C | -3.710441 | 1.965528  | -0.050699 |
| 4  | C | -4.529402 | 0.919888  | -0.482885 |
| 5  | C | -4.027413 | -0.382294 | -0.535630 |
| 6  | C | -2.708343 | -0.613589 | -0.153818 |
| 7  | C | -0.524524 | -0.103309 | 0.627398  |
| 8  | C | -0.146020 | 0.232861  | 2.079863  |
| 9  | C | 1.041196  | -0.512854 | 2.693680  |
| 10 | C | 0.507999  | 0.315563  | -0.463357 |
| 11 | C | 1.916335  | -0.227859 | -0.424770 |
| 12 | C | 2.804379  | 0.845218  | -0.440720 |
| 13 | C | 4.186650  | 0.688239  | -0.491557 |
| 14 | C | 4.670932  | -0.616985 | -0.539294 |
| 15 | C | 3.797942  | -1.708420 | -0.523110 |
| 16 | C | 2.411031  | -1.534283 | -0.457917 |
| 17 | O | 0.698129  | 1.756530  | -0.421527 |
| 18 | O | 1.617757  | -2.638874 | -0.429927 |
| 19 | C | 2.019310  | 2.084451  | -0.416864 |
| 20 | O | 2.378330  | 3.243630  | -0.399316 |
| 21 | O | -0.677768 | -1.546612 | 0.475138  |
| 22 | C | -1.955486 | -1.903393 | -0.114448 |
| 23 | O | -4.769424 | -1.459227 | -0.945176 |
| 24 | H | -1.764116 | 2.560410  | 0.666255  |
| 25 | H | -4.116548 | 2.971244  | -0.012376 |
| 26 | H | -5.558216 | 1.109573  | -0.775195 |
| 27 | H | -1.037351 | 0.029965  | 2.681780  |
| 28 | H | 0.019447  | 1.313295  | 2.138306  |
| 29 | H | 1.101669  | -0.272622 | 3.759506  |
| 30 | H | 1.996051  | -0.235157 | 2.245342  |
| 31 | H | 0.927258  | -1.596655 | 2.611121  |

|    |   |           |           |           |
|----|---|-----------|-----------|-----------|
| 32 | H | 0.053368  | 0.090213  | -1.432813 |
| 33 | H | 4.850676  | 1.545000  | -0.502522 |
| 34 | H | 5.739439  | -0.798421 | -0.585874 |
| 35 | H | 4.188312  | -2.720609 | -0.552291 |
| 36 | H | 0.703908  | -2.386088 | -0.159781 |
| 37 | H | -2.419896 | -2.664731 | 0.518092  |
| 38 | H | -1.786972 | -2.333214 | -1.107725 |
| 39 | H | -5.670341 | -1.189078 | -1.173236 |

Conformation D

$\Delta G = 0.95$  kcal/mol

P(%) = 16.43%

|    |   |           |           |           |
|----|---|-----------|-----------|-----------|
| 1  | C | -1.802666 | 0.405045  | 0.211102  |
| 2  | C | -2.276035 | 1.704108  | 0.363272  |
| 3  | C | -3.588190 | 1.975168  | -0.033760 |
| 4  | C | -4.399338 | 0.976620  | -0.571022 |
| 5  | C | -3.909830 | -0.323563 | -0.718790 |
| 6  | C | -2.604690 | -0.603825 | -0.317086 |
| 7  | C | -0.435803 | -0.161213 | 0.544710  |
| 8  | C | 0.045387  | 0.093050  | 1.976391  |
| 9  | C | -0.929817 | -0.345834 | 3.068308  |
| 10 | C | 0.615046  | 0.265447  | -0.525842 |
| 11 | C | 2.027067  | -0.246411 | -0.374911 |
| 12 | C | 2.893936  | 0.844281  | -0.357790 |
| 13 | C | 4.278443  | 0.715779  | -0.298484 |
| 14 | C | 4.789445  | -0.579737 | -0.260343 |
| 15 | C | 3.938670  | -1.688099 | -0.267598 |
| 16 | C | 2.547191  | -1.542465 | -0.316753 |
| 17 | O | 0.774100  | 1.710943  | -0.519173 |
| 18 | O | 1.778340  | -2.664452 | -0.309916 |
| 19 | C | 2.085478  | 2.067029  | -0.433817 |
| 20 | O | 2.420727  | 3.233251  | -0.431743 |
| 21 | O | -0.611780 | -1.596519 | 0.347179  |
| 22 | C | -1.843918 | -1.896062 | -0.351621 |
| 23 | O | -4.756415 | -1.262585 | -1.254633 |
| 24 | H | -1.653786 | 2.487168  | 0.780220  |
| 25 | H | -3.987515 | 2.978239  | 0.076673  |
| 26 | H | -5.417803 | 1.192402  | -0.877321 |
| 27 | H | 0.257470  | 1.162806  | 2.071882  |
| 28 | H | 1.000423  | -0.424500 | 2.109793  |
| 29 | H | -0.492385 | -0.158206 | 4.053138  |
| 30 | H | -1.152009 | -1.414532 | 3.006463  |
| 31 | H | -1.875923 | 0.199539  | 3.019572  |
| 32 | H | 0.210961  | 0.001510  | -1.507451 |

|    |   |           |           |           |
|----|---|-----------|-----------|-----------|
| 33 | H | 4.925003  | 1.585785  | -0.290077 |
| 34 | H | 5.861592  | -0.739774 | -0.219779 |
| 35 | H | 4.348995  | -2.692032 | -0.228219 |
| 36 | H | 0.838455  | -2.426536 | -0.133901 |
| 37 | H | -2.338026 | -2.714939 | 0.178793  |
| 38 | H | -1.614511 | -2.229719 | -1.370087 |
| 39 | H | -4.332967 | -2.128220 | -1.339198 |

**Table S114.2.9.** Gibbs Free Energies<sup>a</sup> and Equilibrium Populations<sup>b</sup> of Low energy conformers of model (5R)-**11** in MeOH (PCM).

| Conformers | $\Delta G^a$ | $P$ (%) <sup>b</sup> |
|------------|--------------|----------------------|
| <b>A</b>   | 1.39         | 4.02                 |
| <b>B</b>   | 0.74         | 12.03                |
| <b>C</b>   | 0.93         | 8.85                 |
| <b>D</b>   | 1.03         | 7.47                 |
| <b>E</b>   | 1.23         | 5.31                 |
| <b>F</b>   | 0.00         | 42.28                |
| <b>G</b>   | 0.44         | 20.02                |

<sup>a</sup>B3LYP/6-311++G(2d,p), in kcal/mol. <sup>b</sup>From  $G$  values at 298.15K.

**Table S114.2.10.** Cartesian Coordinates, Relative Thermal Free Energies (B3LYP/6-311++G(2d,p) PCM/MeOH), and Equilibrium Populations of Low energy Conformers of model **11** in MeOH (PCM).

| Conformation A             |   |                  |           |           |
|----------------------------|---|------------------|-----------|-----------|
| $\Delta G = 1.39$ kcal/mol |   | $P(\%) = 4.02\%$ |           |           |
| 1                          | C | -0.701081        | 0.193433  | 0.106836  |
| 2                          | C | 0.120129         | 1.235167  | -0.153481 |
| 3                          | C | -2.123018        | 0.302185  | 0.617783  |
| 4                          | C | -0.242223        | -1.199462 | -0.111732 |
| 5                          | O | -1.006484        | -2.142017 | 0.050822  |
| 6                          | C | 1.168365         | -1.442878 | -0.617494 |
| 7                          | C | 2.140056         | -0.33848  | -0.239111 |
| 8                          | O | 2.371313         | -0.469855 | 1.167229  |
| 9                          | C | 1.551306         | 1.027604  | -0.599662 |
| 10                         | C | -0.27399         | 2.682824  | -0.044658 |
| 11                         | O | -3.084596        | -0.226024 | -0.290163 |
| 12                         | H | -2.186977        | -0.220977 | 1.580703  |
| 13                         | H | -2.412462        | 1.336056  | 0.792691  |
| 14                         | H | 1.507703         | -2.411475 | -0.246636 |
| 15                         | H | 1.109781         | -1.518906 | -1.711069 |
| 16                         | H | 3.087627         | -0.477419 | -0.776758 |
| 17                         | H | 3.00745          | 0.196152  | 1.454578  |
| 18                         | H | 1.606998         | 1.166457  | -1.689515 |



|    |   |           |           |           |
|----|---|-----------|-----------|-----------|
| 19 | H | 2.178885  | 1.825716  | -0.181483 |
| 20 | H | -1.349414 | 2.844324  | -0.009959 |
| 21 | H | 0.16564   | 3.131687  | 0.854771  |
| 22 | H | 0.123684  | 3.246563  | -0.895125 |
| 23 | H | -2.918041 | -1.177366 | -0.346189 |

Conformation B

$\Delta G = 0.74$  kcal/mol

P(%) = 12.03%

|    |   |           |           |           |
|----|---|-----------|-----------|-----------|
| 1  | C | -0.708158 | 0.197992  | 0.091978  |
| 2  | C | 0.119106  | 1.242601  | -0.142582 |
| 3  | C | -2.13527  | 0.30233   | 0.590036  |
| 4  | C | -0.239523 | -1.189649 | -0.11511  |
| 5  | O | -0.977942 | -2.144986 | 0.093343  |
| 6  | C | 1.159486  | -1.413532 | -0.661186 |
| 7  | C | 2.141     | -0.321579 | -0.248669 |
| 8  | O | 2.398786  | -0.343561 | 1.159613  |
| 9  | C | 1.560688  | 1.051287  | -0.561463 |
| 10 | C | -0.276652 | 2.687949  | -0.017698 |
| 11 | O | -3.084353 | -0.267506 | -0.305841 |
| 12 | H | -2.199784 | -0.189837 | 1.569327  |
| 13 | H | -2.439815 | 1.337103  | 0.729238  |
| 14 | H | 1.493649  | -2.410076 | -0.357186 |
| 15 | H | 1.082248  | -1.436339 | -1.756984 |
| 16 | H | 3.087422  | -0.447469 | -0.791448 |
| 17 | H | 2.712711  | -1.21905  | 1.416929  |
| 18 | H | 1.64007   | 1.241403  | -1.641063 |
| 19 | H | 2.18189   | 1.813026  | -0.079151 |
| 20 | H | -1.352354 | 2.851986  | -0.015483 |
| 21 | H | 0.134745  | 3.112907  | 0.905958  |
| 22 | H | 0.15246   | 3.268837  | -0.840646 |
| 23 | H | -2.909232 | -1.218461 | -0.328242 |

Conformation C

$\Delta G = 0.93$  kcal/mol

P(%) = 8.85%

|   |   |           |           |           |
|---|---|-----------|-----------|-----------|
| 1 | C | -0.716962 | 0.244091  | -0.283862 |
| 2 | C | 0.17584   | 1.263465  | -0.251249 |
| 3 | C | -2.221588 | 0.382078  | -0.152947 |
| 4 | C | -0.258062 | -1.157847 | -0.463622 |
| 5 | O | -1.062453 | -2.081284 | -0.467629 |
| 6 | C | 1.222397  | -1.421677 | -0.664122 |
| 7 | C | 2.102531  | -0.389262 | 0.039264  |
| 8 | O | 2.102077  | -0.560803 | 1.457279  |
| 9 | C | 1.666686  | 1.020079  | -0.364895 |

|    |   |           |           |           |
|----|---|-----------|-----------|-----------|
| 10 | C | -0.185609 | 2.71707   | -0.122608 |
| 11 | O | -2.729848 | -0.309385 | 0.983764  |
| 12 | H | -2.524703 | 1.418462  | -0.0268   |
| 13 | H | -2.698351 | 0.006266  | -1.067324 |
| 14 | H | 1.447357  | -2.435844 | -0.329494 |
| 15 | H | 1.414578  | -1.386499 | -1.745552 |
| 16 | H | 3.146941  | -0.541922 | -0.240524 |
| 17 | H | 1.208593  | -0.439426 | 1.806056  |
| 18 | H | 1.973471  | 1.215247  | -1.402974 |
| 19 | H | 2.205863  | 1.750603  | 0.246702  |
| 20 | H | -1.251305 | 2.922793  | -0.187501 |
| 21 | H | 0.1782    | 3.109498  | 0.834148  |
| 22 | H | 0.320094  | 3.298445  | -0.901602 |
| 23 | H | -2.610352 | -1.25382  | 0.811796  |

Conformation D

$\Delta G = 1.03$  kcal/mol

P(%) = 7.47%

|    |   |           |           |           |
|----|---|-----------|-----------|-----------|
| 1  | C | -0.691603 | 0.183133  | 0.116675  |
| 2  | C | 0.127179  | 1.228724  | -0.155266 |
| 3  | C | -2.11482  | 0.290241  | 0.627517  |
| 4  | C | -0.239031 | -1.21093  | -0.120919 |
| 5  | O | -1.009927 | -2.149949 | 0.033093  |
| 6  | C | 1.178871  | -1.450893 | -0.607833 |
| 7  | C | 2.144835  | -0.333018 | -0.222028 |
| 8  | O | 2.488781  | -0.374992 | 1.165015  |
| 9  | C | 1.553425  | 1.021052  | -0.619367 |
| 10 | C | -0.272496 | 2.674488  | -0.052305 |
| 11 | O | -3.074623 | -0.199136 | -0.302476 |
| 12 | H | -2.191539 | -0.262188 | 1.573006  |
| 13 | H | -2.394084 | 1.321206  | 0.832959  |
| 14 | H | 1.517738  | -2.419871 | -0.235931 |
| 15 | H | 1.128324  | -1.529851 | -1.702676 |
| 16 | H | 3.10053   | -0.477102 | -0.730096 |
| 17 | H | 1.695529  | -0.250782 | 1.702822  |
| 18 | H | 1.582399  | 1.129142  | -1.713513 |
| 19 | H | 2.188475  | 1.820569  | -0.224128 |
| 20 | H | -1.346638 | 2.832873  | 0.016161  |
| 21 | H | 0.199012  | 3.139249  | 0.822154  |
| 22 | H | 0.095724  | 3.224607  | -0.924431 |
| 23 | H | -2.927476 | -1.152015 | -0.380239 |

Conformation E

$\Delta G = 1.23$  kcal/mol

P(%) = 5.31%

|    |   |           |           |           |
|----|---|-----------|-----------|-----------|
| 1  | C | -0.740965 | 0.206637  | -0.293995 |
| 2  | C | 0.094097  | 1.2693    | -0.225611 |
| 3  | C | -2.254185 | 0.260364  | -0.208148 |
| 4  | C | -0.196405 | -1.163015 | -0.433964 |
| 5  | O | -0.924402 | -2.144784 | -0.352638 |
| 6  | C | 1.283384  | -1.325063 | -0.726177 |
| 7  | C | 2.131819  | -0.274663 | -0.014003 |
| 8  | O | 2.091651  | -0.435723 | 1.40656   |
| 9  | C | 1.598981  | 1.122045  | -0.305526 |
| 10 | C | -0.34812  | 2.697755  | -0.069506 |
| 11 | O | -2.762979 | -0.390982 | 0.951058  |
| 12 | H | -2.620714 | 1.282666  | -0.156713 |
| 13 | H | -2.678347 | -0.1971   | -1.111878 |
| 14 | H | 1.581628  | -2.344902 | -0.466126 |
| 15 | H | 1.422895  | -1.225146 | -1.811347 |
| 16 | H | 3.172707  | -0.344675 | -0.357903 |
| 17 | H | 2.333314  | -1.340641 | 1.639108  |
| 18 | H | 1.924643  | 1.431841  | -1.308639 |
| 19 | H | 2.069761  | 1.825624  | 0.388577  |
| 20 | H | -1.418266 | 2.850491  | -0.186753 |
| 21 | H | -0.062402 | 3.064352  | 0.923333  |
| 22 | H | 0.168313  | 3.337341  | -0.793853 |
| 23 | H | -2.539334 | -1.3281   | 0.863939  |

Conformation F

$\Delta G = 0.00$  kcal/mol

P(%) = 42.28%

|    |   |           |           |           |
|----|---|-----------|-----------|-----------|
| 1  | C | 0.861764  | 0.176488  | -0.215067 |
| 2  | C | 0.049683  | 1.257155  | -0.130095 |
| 3  | C | 2.377177  | 0.209664  | -0.267816 |
| 4  | C | 0.289256  | -1.191191 | -0.267007 |
| 5  | O | 1.013823  | -2.178428 | -0.263016 |
| 6  | C | -1.219638 | -1.337017 | -0.352138 |
| 7  | C | -1.933191 | -0.23255  | 0.422107  |
| 8  | O | -3.348773 | -0.264765 | 0.243176  |
| 9  | C | -1.456349 | 1.126036  | -0.062972 |
| 10 | C | 0.521712  | 2.684307  | -0.101825 |
| 11 | O | 2.975978  | -0.452424 | 0.841302  |
| 12 | H | 2.712574  | -0.250679 | -1.206483 |
| 13 | H | 2.760812  | 1.2266    | -0.245977 |
| 14 | H | -1.512648 | -1.270845 | -1.408417 |
| 15 | H | -1.488462 | -2.336823 | -0.001101 |
| 16 | H | -1.695998 | -0.332386 | 1.491244  |
| 17 | H | -3.70383  | -1.073922 | 0.630907  |

|    |   |           |           |           |
|----|---|-----------|-----------|-----------|
| 18 | H | -1.86944  | 1.911762  | 0.577489  |
| 19 | H | -1.879569 | 1.306634  | -1.061301 |
| 20 | H | 1.582304  | 2.810922  | -0.305474 |
| 21 | H | -0.038241 | 3.279155  | -0.831782 |
| 22 | H | 0.311167  | 3.126823  | 0.878739  |
| 23 | H | 2.750634  | -1.389659 | 0.759332  |

Conformation G

$\Delta G = 0.44$  kcal/mol

P(%) = 20.02%

|    |   |           |           |           |
|----|---|-----------|-----------|-----------|
| 1  | C | 0.861212  | 0.182322  | -0.20964  |
| 2  | C | 0.048336  | 1.262251  | -0.137446 |
| 3  | C | 2.376761  | 0.217714  | -0.254407 |
| 4  | C | 0.290517  | -1.188732 | -0.265521 |
| 5  | O | 1.023337  | -2.169188 | -0.2861   |
| 6  | C | -1.216346 | -1.349937 | -0.324039 |
| 7  | C | -1.93159  | -0.238188 | 0.422535  |
| 8  | O | -3.332766 | -0.429231 | 0.230747  |
| 9  | C | -1.459184 | 1.119131  | -0.095221 |
| 10 | C | 0.515829  | 2.691009  | -0.107721 |
| 11 | O | 2.971213  | -0.452904 | 0.851513  |
| 12 | H | 2.716384  | -0.234    | -1.195666 |
| 13 | H | 2.759143  | 1.234906  | -0.222208 |
| 14 | H | -1.52337  | -1.319584 | -1.37834  |
| 15 | H | -1.484763 | -2.334593 | 0.061091  |
| 16 | H | -1.692849 | -0.314216 | 1.493241  |
| 17 | H | -3.823063 | 0.162693  | 0.814197  |
| 18 | H | -1.881339 | 1.927407  | 0.514904  |
| 19 | H | -1.864947 | 1.2659    | -1.106031 |
| 20 | H | 1.582739  | 2.817758  | -0.2751   |
| 21 | H | -0.018022 | 3.276963  | -0.864276 |
| 22 | H | 0.270567  | 3.144446  | 0.859785  |
| 23 | H | 2.752046  | -1.390512 | 0.757888  |

S115 Possible isomers, experimental and calculated ECD of compound **5**, **8-11**.

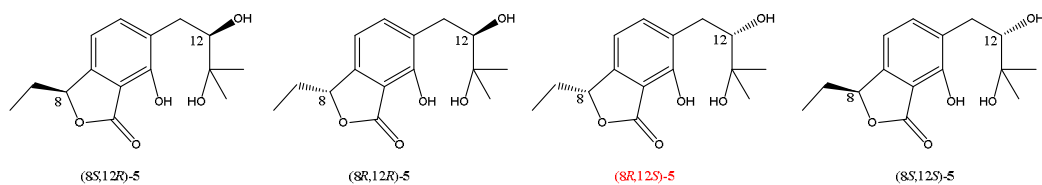

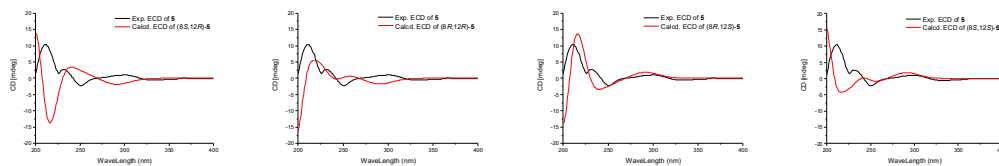

**Figure S115.1** Possible isomers, experimental and calculated ECD of **5**.

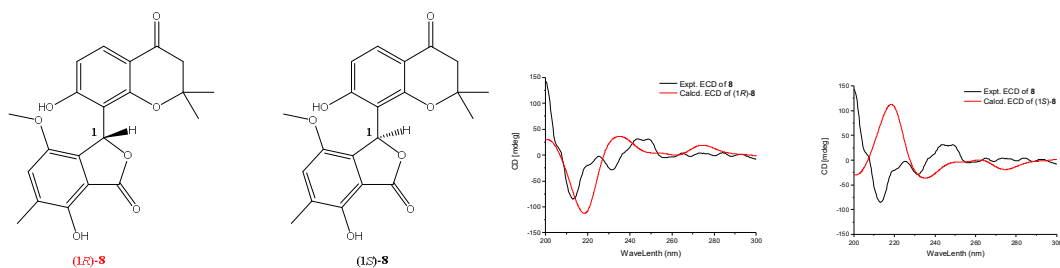

**Figure S115.2** Possible isomers, experimental and calculated ECD of **8**.

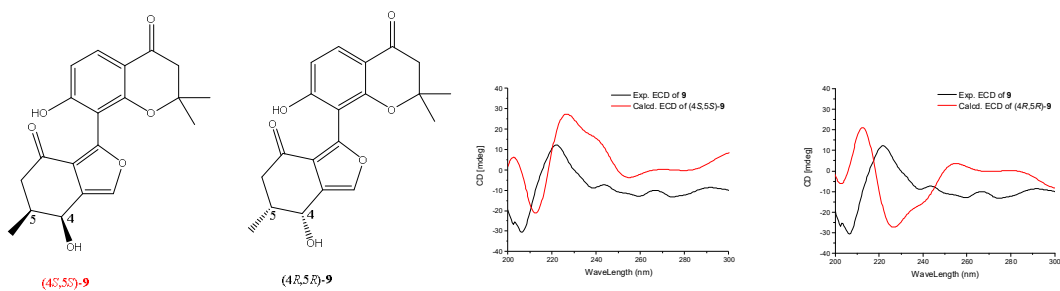

**Figure S115.3** Possible isomers, experimental and calculated ECD of **9**.

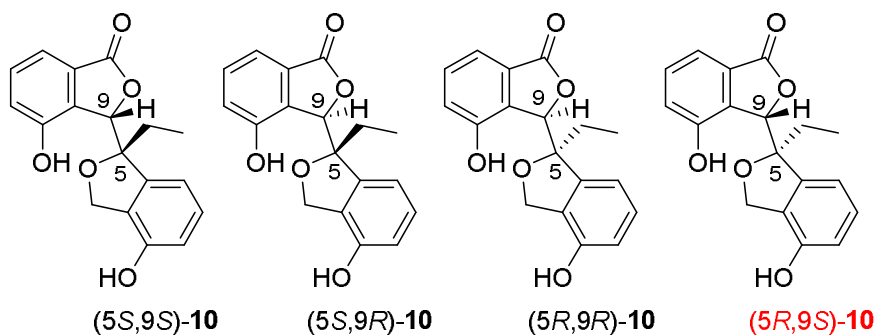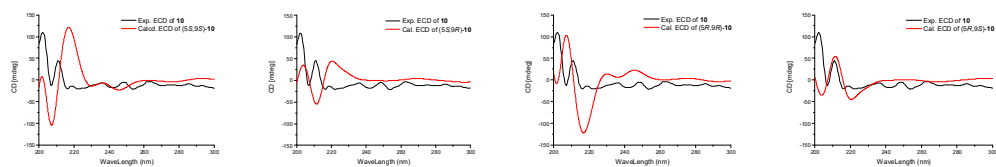

**Figure S115.4** Possible isomers, experimental and calculated ECD of **10**.

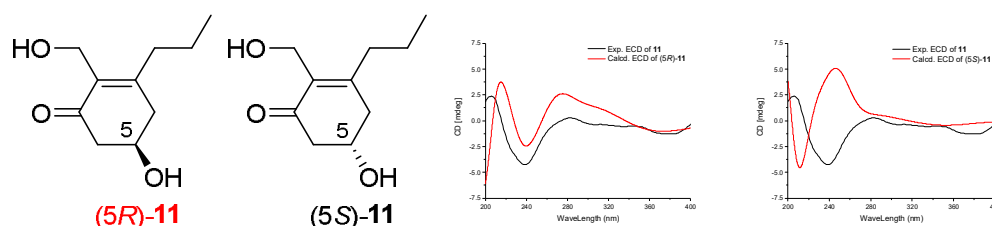

**Figure S115.5.** Possible isomers, experimental and calculated ECD of **11**.

**S116** Detailed procedure of inhibitory activity of enzymes assay.

Phosphatase Enzyme Inhibition Assays. Recombinant human phosphatase TCPTP, SHP1, PTP1B were expressed in *Escherichia coli* and purified. The enzyme inhibition assays were measured using *p*-nitrophenyl phosphate (pNPP) as a substrate in a 96-well plate with a final volume of 100  $\mu$ L. Human recombinant TCPTP, SHP1, PTP1B (0.05  $\mu$ g) in 50  $\mu$ L reaction buffer (pH 6.5) containing 50 mM HEPES, 100mM NaCl, 1 mM EDTA, and 1 mM dithiothreitol (DTT) and test compounds were added to each well of a 96-well plate. Na<sub>3</sub>VO<sub>4</sub> was used as the positive control and DMSO as the negative control to evaluate the high-throughput screening (HTS) system. After preincubation for 15 min at room temperature, 50  $\mu$ L of reaction buffer containing 50 mM pNPP was added and incubated at 37°C for 60 min. The phosphatase activity was determined by measuring the absorbance at 405 nm for the amount of produced *p*-nitrophenol. Each compound was assayed in triplicate.

The cathepsin B assays were carried out in triplicate according to a published method<sup>1</sup> with modification: 50  $\mu$ L of reaction buffer (100 mM AcONa, 1 mM EDTA, 4 mM dithiothreitol, pH 5.5) containing 0.0025 units of cathepsin B and 2  $\mu$ L of compounds dissolved in DMSO were added to each well of a 96 well plate. After preincubation for 15 min at r.t., 50  $\mu$ L of reaction buffer (100  $\mu$ M Z-Arg-Arg-7-amido-4-methylcoumarin) was added and incubated for 30 min at r.t. Fluorescence was measured using a microplate reader (Wallac 1420 Victor2, Perkin-Elmer Ex 355, Em 460 nm). The IC<sub>50</sub> value was defined as the concentration of sample necessary to inhibit the cathepsin B activity to 50% of the control. Leupeptin was used as a positive control substance.

**S117** ITS gene sequences of *Aspergillus gorakhpurensis* F07ZB1707.

GenBank accession No. MT994887

AGTGAAGGGCCCTCTGGGTCCGACCTCCCACCCTTGTCTATCGTACCT  
 TGTTGCTTCGGCGGGCCCGCCATTCGTGGCCGCCGGGGGGGCATCTGCCCCC  
 GGGCCCGCGCCCGCCGGAGACAAATACGAACACTGTCTGAAGTTGCAGTC  
 TGAGTTGATTTATTCAATCATTAATACTTTCAACAACGGATCTCTTGGTTCC  
 GGCATCGATGAAGAACGCAGCGAAATGCGATAACTAATGTGAATTGCAGAA  
 TTCAGTGAATCATCGAGTCTTTGAACGCACATTGCGCCCCTTGGTATTCCGG  
 GGGGCATGCCTGTCCGAGCGTCATTGCTGCCCTCAAGCACGGCTTGTGTGT  
 TGGGCCCTCGTCCCCTCCCCGGGGACGGGCCCGAAAGGCAGCGGCGGCA  
 CCGAGTCCGGTCCTCGAGCGTATGGGATAACACCCGCTTTCGTAGGCCCGG  
 CCGGCGCTTGCCGACCCCAACCTATTTTTTAACCAGGTTGACCTCGGATCA  
 GGTAGGGATAACCGCTGAACTTAAGCATATCAATAAGCGGAGGA

## References

- 1 W. Halangk, M.M. Lerch, B. Brandt-Nedelev, W. Roth, M. Ruthenbuerger, T. Reinheckel, W. Domschke, H. Lippert, C. Peters and J. Deussing, *J. Clin. Invest.*, 2000, **106**, 773-781.
